# Supplementary material for: Au(i)-catalyzed synthesis of 8-oxabicyclo[3.2.1]oct-2-enes and 9-oxabicyclo[3.3.1]nona-2,6-dienes from enynol via oxonium/Prins-type cyclization
Source: Royal Society of Chemistry journal article supplement (doi:10.1039/c5cc02847g), 2015-01-01

# **Supporting Information**

## **Au (I)-Catalyzed Synthesis of 8-Oxabicyclo[3.2.1]oct-2-enes and 9-Oxabicyclo[3.3.1]nona-2,6-dienes from En-yne-ol via Oxonium/Prins-type Cyclization**

Jaya Kishore Vandavasi,<sup>a</sup> Wan-Ping Hu,<sup>b</sup> Siva Senthil Kumar Boominathan,<sup>a</sup> Bing-Chun Guo,<sup>a</sup> Cheng-Tien Hsiao<sup>a</sup> and Jeh-Jeng Wang<sup>a</sup>

### **Table of Contents**

|                             |    |
|-----------------------------|----|
| I. General Information..... | S1 |
| II. Standard Protocol.....  | S2 |
| III. X-ray Structures.....  | S7 |
| IV. NMR.....                | S9 |

## I. General Information

Unless otherwise noted, all the reactions for the preparations of the substrates were performed in oven-dried glassware under nitrogen atmosphere with freshly distilled solvents. Solvents were dried under standard methods. All other commercial reagents were used without further purification.  $^1\text{H}$  NMR and  $^{13}\text{C}$  NMR spectra were recorded on 400 MHz Spectrometers using chloroform-d ( $\text{CDCl}_3$ ) as the internal standards. Multiplicities were denoted as (s = singlet, d = doublet, t = triplet, q = quartet, m = multiplet or overlap of nonequivalent resonances, integration). Aluminum-backed plates precoated with silica gel 60F254 were used for thin layer chromatography and were visualized with a UV lamp. Melting points are uncorrected. Mass spectra and high resolution mass spectra (HRMS) were obtained by electron impact at 70 eV in an ion trap. Flash column chromatography was carried out over silica gel 60 (230-400 mesh).

## II. Standard protocol

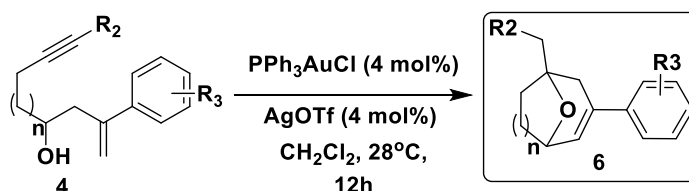

### Compound 6 Synthesis protocol:

To a solution of Compound 3 (50 mg, 0.18 mmol) in dichloromethane (6 mL) at 28 °C, PPh<sub>3</sub>AuCl (1.78 mg, 0.0072 mmol), and AgOTf (1.85 mg, 0.0072 mmol). The resulting solution was stirred for 12 h at 28 °C. The reaction mixture was directly purified by column chromatography technique (hexane/EtOAc: 10/1) to obtain compound 4 (41 mg, 82%).

**1-benzyl-3-(p-tolyl)-8-oxabicyclo[3.2.1]oct-2-ene (6a):** Yellow oil; IR (neat)<sub>vmax</sub>: 3026, 2953, 1514, 1496, 1454, 1330, 1022, 804 cm<sup>-1</sup>;  $^1\text{H}$  NMR (400 MHz,  $\text{CDCl}_3$ ):  $\delta$  7.34-7.20 (m, 7H), 7.09 (d,  $J$  = 8.4 Hz, 2H), 6.29 (dt,  $J$  = 3.2, 1.6 Hz, 1H), 4.68-4.66 (m, 1H), 3.12-3.03 (m, 2H), 2.76 (d,  $J$  = 16.8 Hz, 1H), 2.31 (s, 3H), 2.20 (dd,  $J$  = 16.4, 1.2 Hz, 1H), 1.99-1.86 (m, 3H), 1.81-1.73 (m, 1H).  $^{13}\text{C}$  NMR (100 MHz,  $\text{CDCl}_3$ )  $\delta$  137.5, 137.0, 136.9, 133.2, 130.3, 128.9, 128.0, 126.7, 126.3, 124.7, 81.1, 74.2, 46.2, 40.7, 35.4, 33.7, 21.0. HRMS calcd for C<sub>21</sub>H<sub>22</sub>NaO [M+H]: 313.1562 found 313.1563.

**1-(2-methoxybenzyl)-3-phenyl-8-oxabicyclo[3.2.1]oct-2-ene (6b):** Light Yellow oil; IR (neat)<sub>vmax</sub>: 3031, 2926, 2361, 1732, 1651, 1599, 1493, 1243, 1127 cm<sup>-1</sup>;  $^1\text{H}$  NMR (400 MHz,  $\text{CDCl}_3$ ):  $\delta$  7.38-7.20 (m, 7H), 6.94-6.88 (m, 2H), 6.33 (dt,  $J$  = 3.2, 1.6 Hz, 1H), 4.69-4.66 (m, 1H), 3.85 (s, 3H), 3.16 (s, 2H), 2.80 (d,  $J$  = 16.8 Hz, 1H), 2.27 (dd,  $J$  = 16.8, 1.2 Hz, 1H), 2.00-1.91 (m, 3H), 1.84-1.76 (m, 1H).  $^{13}\text{C}$  NMR (100 MHz,  $\text{CDCl}_3$ )  $\delta$  157.7, 139.9, 133.6, 132.2, 128.2, 127.5, 127.1, 126.0, 124.8, 120.3, 110.4, 81.7, 74.2, 55.2, 40.5, 38.6, 35.4, 33.6. HRMS calcd for C<sub>21</sub>H<sub>22</sub>NaO<sub>2</sub> [M+Na]: 329.1517 found 329.1518.

**1-(2-methoxybenzyl)-3-(p-tolyl)-8-oxabicyclo[3.2.1]oct-2-ene (6c)**: yellow oil; IR (neat) $\nu_{\text{max}}$ : 3026, 2954, 2359, 1601, 1587, 1493, 1244, 1117  $\text{cm}^{-1}$ ;  $^1\text{H}$  NMR (400 MHz,  $\text{CDCl}_3$ ): 7.44 (dd,  $J = 7.6, 1.6$  Hz, 1H), 7.30-7.25 (m, 3H), 7.16 (d,  $J = 8$  Hz, 2H), 7.00-6.92 (m, 2H), 6.34 (dt,  $J = 3.2, 1.6$  Hz, 1H), 4.73-4.72 (m, 1H), 3.89 (s, 3H), 3.22 (s, 2H), 2.85 (d,  $J = 17.2$  Hz, 1H), 2.37 (s, 3H), 2.32 (dd,  $J = 16.8, 1.2$  Hz, 1H), 2.03-1.97 (m, 3H), 1.89-1.80 (m, 1H).  $^{13}\text{C}$  NMR (100 MHz,  $\text{CDCl}_3$ )  $\delta$  157.6, 137.0, 136.8, 133.3, 132.1, 128.8, 127.4, 126.6, 125.9, 124.6, 120.2, 110.2, 81.6, 74.1, 55.1, 40.5, 38.5, 35.4, 33.5, 20.9. HRMS calcd for  $\text{C}_{22}\text{H}_{24}\text{NaO}_2$  [ $\text{M}+\text{Na}$ ]: 343.1668 found 343.1667.

**1-benzyl-3-phenyl-8-oxabicyclo[3.2.1]oct-2-ene (6d)**: White solid, m.p: 9-101  $^\circ\text{C}$ ; IR (neat) $\nu_{\text{max}}$ : 3028, 2954, 2362, 1600, 1494, 1454, 1362  $\text{cm}^{-1}$ ;  $^1\text{H}$  NMR (400 MHz,  $\text{CDCl}_3$ ):  $\delta$  7.34-7.20 (m, 10H), 6.33 (dt,  $J = 3.6, 1.6$  Hz, 1H), 4.68 (t,  $J = 4.0$  Hz, 1H), 3.13-3.03 (m, 2H), 2.78 (d,  $J = 16.8$  Hz, 1H), 2.21 (dt,  $J = 16.8, 1.6$  Hz, 1H), 2.01-1.87 (m, 3H), 1.82-1.74 (m, 1H).  $^{13}\text{C}$  NMR (100 MHz,  $\text{CDCl}_3$ )  $\delta$  139.8, 137.4, 133.4, 130.3, 129.6, 128.2, 128.0, 127.6, 127.2, 126.3, 124.8, 81.1, 74.2, 46.1, 43.1, 40.7, 39.6, 35.4, 33.7, 30.6. HRMS calcd for  $\text{C}_{20}\text{H}_{20}\text{NaO}$  [ $\text{M}+\text{Na}$ ]: 299.1406 found 299.1405.

**1-(2-methoxybenzyl)-3-(p-tolyl)-9-oxabicyclo[3.3.1]non-2-ene (6e)**: Colorless oil; IR (neat) $\nu_{\text{max}}$ : 2946, 2346, 1599, 1498, 1458, 1240  $\text{cm}^{-1}$ ;  $^1\text{H}$  NMR (400 MHz,  $\text{CDCl}_3$ ):  $\delta$  7.33 (dd,  $J = 7.2, 1.6$  Hz, 1H), 7.30-7.25 (m, 2H), 7.20 (td,  $J = 8.0, 2.0$  Hz, 1H), 7.12 (d,  $J = 7.6$  Hz, 2H), 6.91-6.85 (m, 2H), 6.07 (dt,  $J = 4.0, 2.0$  Hz, 1H), 4.64 (s, 1H), 3.81 (s, 3H), 3.0 (d,  $J = 13.6$  Hz, 1H), 2.88 (d,  $J = 13.2$  Hz, 1H), 2.74 (d,  $J = 17.6$  Hz, 1H), 2.33 (s, 3H), 2.25 (dd,  $J = 17.6, 1.2$  Hz, 1H), 1.85-1.72 (m, 2H), 1.65-1.58 (m, 3H), 1.49-1.41 (m, 1H).  $^{13}\text{C}$  NMR (100 MHz,  $\text{CDCl}_3$ )  $\delta$  137.4, 136.9, 136.3, 132.6, 128.9, 127.4, 125.8, 124.7, 123.8, 120.1, 110.4, 72.8, 69.7, 55.2, 42.9, 36.5, 35.9, 27.9, 21.0, 16.3. HRMS calcd for  $\text{C}_{23}\text{H}_{26}\text{NaO}_2$  [ $\text{M}+\text{Na}$ ]: 357.1830 found 357.1832.

**1-(2-methoxybenzyl)-3-phenyl-9-oxabicyclo[3.3.1]non-2-ene (6f)**: Yellow oil; IR (neat) $\nu_{\text{max}}$ : 2926, 2348, 1601, 1492, 1460, 1244  $\text{cm}^{-1}$ ;  $^1\text{H}$  NMR (400 MHz,  $\text{CDCl}_3$ ):  $\delta$  7.42-7.20 (m, 7H), 6.94-6.88 (m, 2H), 6.13 (dt,  $J = 4.0, 2.0$  Hz, 1H), 4.67 (t,  $J = 6.4$  Hz, 1H), 3.83 (s, 3H), 3.05-2.90 (m, 2H), 2.78 (d,  $J = 17.6$  Hz, 1H), 2.29 (dt,  $J = 18.0, 1.2$  Hz, 1H), 1.85-1.79 (m, 2H), 1.66-1.63 (m, 2H), 1.52-1.44 (m, 2H).  $^{13}\text{C}$  NMR (100 MHz,  $\text{CDCl}_3$ )  $\delta$  157.9, 140.2, 136.4, 132.6, 128.2, 127.4, 127.1, 125.7, 124.8, 124.7, 120.1, 110.3, 72.8, 69.7, 55.2, 42.9, 36.4, 35.8, 27.8, 16.3. HRMS calcd for  $\text{C}_{22}\text{H}_{24}\text{NaO}_2$  [ $\text{M}+\text{Na}$ ]: 343.1673 found 343.1674.

**5-methyl-3-phenyl-8-oxabicyclo[3.2.1]oct-2-ene (6g) (two isomers are inseparable)**: Colorless oil; IR (neat) $\nu_{\text{max}}$ : 3028, 2954, 2362, 1600, 1494, 1454, 1362  $\text{cm}^{-1}$ ;  $^1\text{H}$  NMR (400 MHz,  $\text{CDCl}_3$ ):  $\delta$  7.45 (d,  $J = 2.0$  Hz, 2H), 7.43 (d,  $J = 2.0$  Hz, 2H), 7.35 (t,  $J = 7.2$  Hz, 4H), 7.28 (d,  $J = 6.8$  Hz, 2H), 6.14 (t,  $J = 2.4$  Hz, 1H), 5.98 (s, 1H), 4.64 (s, 1H), 4.48 (t,  $J = 6.8$  Hz, 1H), 2.98-2.92 (m, 1H), 2.57 (d,  $J = 17.6$  Hz, 1H), 2.38 (d,  $J = 18.0$  Hz, 1H), 2.19 (d,  $J = 18.0$  Hz, 1H), 1.92-1.80 (m, 3H), 1.64-1.52 (m, 5H), 1.37 (s, 2H), 1.35 (s, 2H).  $^{13}\text{C}$  NMR (100 MHz,  $\text{CDCl}_3$ )  $\delta$  139.9, 139.7, 136.0, 135.4, 128.6, 128.1, 127.0, 124.6, 124.4, 69.7, 69.5, 67.9, 38.7, 37.5, 34.9, 31.6, 31.5, 30.5, 28.0, 27.5, 17.1, 16.3. HRMS calcd for  $\text{C}_{15}\text{H}_{18}\text{NaO}$  [ $\text{M}+\text{Na}$ ]: 237.1249 found 237.1251.

**5-methyl-3-phenyl-8-oxabicyclo[3.2.1]oct-2-ene (6h) (two isomers are inseparable):**

Colorless oil; IR (neat)<sub>vmax</sub>: 2926, 2348, 1601, 1492, 1460, 1244 cm<sup>-1</sup>; <sup>1</sup>H NMR (400 MHz, CDCl<sub>3</sub>): δ 7.31-7.27 (m, 4H), 7.23 (t, *J* = 7.6 Hz, 4H), 7.18-7.14 (m, 2H), 6.28 (dt, *J* = 3.2, 1.6 Hz, 1H), 6.14 (t, *J* = 2.0 Hz, 1H), 4.65 (t, 7.2 Hz, 1H), 4.59 (t, *J* = 5.6 Hz, 1H), 2.92-2.87 (m, 1H), 2.66 (d, *J* = 16.8 Hz, 1H), 2.26-2.15 (m, 2H), 2.08-2.00 (m, 3H), 1.94-1.88 (m, 1H), 1.86-1.78 (m, 1H), 1.72-1.62 (m, 3H), 1.43 (s, 3H), 1.41 (s, 3H). <sup>13</sup>C NMR (100 MHz, CDCl<sub>3</sub>) δ 139.7, 139.6, 133.3, 132.2, 131.0, 128.2, 127.4, 127.2, 124.7, 78.7, 78.0, 74.5, 73.9, 42.5, 41.5, 35.8, 35.6, 35.5, 31.1, 26.9, 23.2. HRMS calcd for C<sub>14</sub>H<sub>16</sub>NaO [M+Na]: 223.1098 found 223.1096.

**5-(4-methylbenzyl)-3-phenyl-9-oxabicyclo[3.3.1]non-2-ene (6i):**

Colorless oil; IR (neat)<sub>vmax</sub>: 3028, 2954, 2362, 1600, 1494, 1454, 1362 cm<sup>-1</sup>; <sup>1</sup>H NMR (400 MHz, CDCl<sub>3</sub>): δ 7.25-7.19 (m, 4H), 7.16-7.12 (m, 3H), 7.03 (d, *J* = 8.0 Hz, 2H), 6.25 (dt, *J* = 3.2, 1.6 Hz, 1H), 4.60 (t, *J* = 6.0 Hz, 1H), 3.00-2.92 (m, 2H), 2.69 (d, *J* = 17.2 Hz, 1H), 2.25 (s, 3H), 2.13 (dd, *J* = 16.4, 1.6 Hz, 1H), 1.91-1.81 (m, 3H), 1.72-1.65 (m, 1H). <sup>13</sup>C NMR (100 MHz, CDCl<sub>3</sub>) δ 139.8, 135.8, 134.3, 133.4, 130.1, 128.7, 128.2, 127.6, 127.2, 124.8, 81.2, 74.2, 45.7, 40.6, 35.4, 33.7, 21.0. HRMS calcd for C<sub>21</sub>H<sub>22</sub>NaO [M+Na]: 313.1568 found 313.1566.

**3-methoxy-9-phenyl-7-(p-tolyl)-5,6,9,10-tetrahydro-5,9-epoxybenzo[8]annulene (7a):**

Light yellow solid, m.p: 150-152 °C; IR (neat)<sub>vmax</sub>: 3028, 2923, 2346, 1614, 1504, 1251 cm<sup>-1</sup>; <sup>1</sup>H NMR (400 MHz, CDCl<sub>3</sub>): δ 7.67-7.64 (m, 2H), 7.44-7.39 (m, 2H), 7.31 (tt, *J* = 7.2, 1.2 Hz, 1H), 7.20-7.17 (m, 2H), 7.07-7.03 (m, 3H), 6.75 (dd, *J* = 8.4, 2.8 Hz, 1H), 6.67 (d, *J* = 2.4 Hz, 1H), 6.17 (d, *J* = 2.0 Hz, 1H), 5.48 (d, *J* = 6.0 Hz, 1H), 3.79 (s, 3H), 3.28-3.11 (m, 3H), 2.52 (d, *J* = 16.8 Hz, 1H), 2.28 (s, 3H). <sup>13</sup>C NMR (100 MHz, CDCl<sub>3</sub>) δ 157.7, 145.0, 138.8, 137.2, 136.9, 131.6, 129.6, 128.9, 128.4, 127.5, 127.2, 125.1, 124.9, 124.8, 112.7, 110.0, 74.0, 71.3, 55.2, 38.6, 33.7, 21.0. HRMS calcd for C<sub>26</sub>H<sub>25</sub>O<sub>2</sub> [M+H]: 369.1854 found 369.1855.

**3-methoxy-7,9-diphenyl-5,6,9,10-tetrahydro-5,9-epoxybenzo[8]annulene (7b):**

Light brown solid, m.p: 146-148 °C; IR (neat)<sub>vmax</sub>: 3028, 2924, 2346, 1615, 1504, 1252 cm<sup>-1</sup>; <sup>1</sup>H NMR (400 MHz, CDCl<sub>3</sub>): δ 7.67-7.63 (m, 2H), 7.43-7.39 (m, 2H), 7.32-7.16 (m, 6H), 7.04 (d, *J* = 8.0 Hz, 1H), 6.75 (dd, *J* = 8.0, 2.4 Hz, 1H), 6.67 (d, *J* = 2.4 Hz, 1H), 6.20 (d, *J* = 1.6 Hz, 1H), 5.48 (d, *J* = 5.6 Hz, 1H), 3.79 (s, 3H), 3.32-3.22 (m, 2H), 3.14 (d, *J* = 16.0 Hz, 1H), 2.53 (d, *J* = 16.4 Hz, 1H). <sup>13</sup>C NMR (100 MHz, CDCl<sub>3</sub>) δ 157.7, 144.9, 139.8, 138.8, 131.8, 128.4, 128.2, 127.7, 127.4, 127.2, 125.1, 124.9, 112.8, 110.1, 74.1, 71.3, 55.2, 38.6, 33.8. HRMS calcd for C<sub>25</sub>H<sub>23</sub>O<sub>2</sub> [M+H]: 355.1692 found 355.1690.

**7,9-diphenyl-5,6,9,10-tetrahydro-5,9-epoxybenzo[8]annulene (7c):**

Yellow solid, m.p: 110-112 °C; IR (neat)<sub>vmax</sub>: 3027, 2922, 2358, 1599, 1494, 1447, 1351 cm<sup>-1</sup>; <sup>1</sup>H NMR (400 MHz, CDCl<sub>3</sub>): δ 7.60 (dd, *J* = 8.4, 1.2 Hz, 2H), 7.37-7.31 (m, 2H), 7.26-7.04 (m, 10H), 6.15 (d, *J* = 2.0 Hz, 1H), 5.46 (d, *J* = 6.0 Hz, 1H), 3.32 (d, *J* = 16.0 Hz, 1H), 3.22-3.11 (m, 2H), 2.46 (d, *J* = 16.4 Hz, 1H). <sup>13</sup>C NMR (100 MHz, CDCl<sub>3</sub>) δ 144.9, 139.8, 137.7, 133.0, 131.9, 128.8, 128.6, 128.5, 128.4, 128.3, 128.2, 127.4, 127.2, 126.7, 126.0, 124.9, 73.9, 71.2, 39.3, 33.8, 31.6, 29.6. HRMS calcd for C<sub>24</sub>H<sub>21</sub>O [M+H]: 325.1586 found 325.1588.

**7,9-diphenyl-5,6,9,10-tetrahydro-5,9-epoxycycloocta[4,5]benzo[1,2-d][1,3]dioxole(7d):**

White solid, m.p: 179-181 °C; IR (neat)<sub>vmax</sub>: 3028, 2896, 2378, 1484, 1343, 1236 cm<sup>-1</sup>; <sup>1</sup>H NMR (400 MHz, CDCl<sub>3</sub>): δ 7.57 (dd, *J* = 7.2 Hz, 2H), 7.35 (t, *J* = 7.2 Hz, 2H), 7.26-7.11 (m, 6H), 6.53 (d, *J* = 9.2 Hz, 2H), 6.14 (d, *J* = 2.0 Hz, 1H), 5.82 (dd, *J* = 12.8, 1.2 Hz, 2H), 5.35 (d, *J* = 5.6 Hz, 1H), 3.22 (d, *J* = 16.0 Hz, 1H), 3.17-3.10 (m, 1H), 3.01 (d, *J* = 16.0 Hz, 1H), 2.41 (d, *J* = 16.4 Hz, 1H). <sup>13</sup>C NMR (100 MHz, CDCl<sub>3</sub>) δ 146.4, 145.9, 144.7, 139.8, 131.8, 130.6, 128.4, 128.3, 128.2, 127.4, 127.2, 126.0, 124.9, 108.5, 105.0, 100.7, 73.7, 71.2, 39.4, 33.6. HRMS calcd for C<sub>25</sub>H<sub>21</sub>O<sub>3</sub> [M+H]: 369.1486 found 369.1485.

**9-(cyclohex-1-en-1-yl)-7-phenyl-5,6,9,10-tetrahydro-5,9-epoxybenzo[8]annulene (7e):** Light yellow oil; IR (neat)<sub>vmax</sub>: 3023, 2925, 2364, 1730, 1600, 1493, 1446, 1349, 1264, 1073 cm<sup>-1</sup>; <sup>1</sup>H NMR (400 MHz, CDCl<sub>3</sub>): δ 7.32-7.06 (m, 9H), 6.02 (d, *J* = 2.4 Hz, 1H), 6.00-5.98 (m, 1H), 5.37 (d, *J* = 5.6 Hz, 1H), 3.25 (d, *J* = 16.0 Hz, 1H), 3.19-3.13 (m, 1H), 2.85 (d, *J* = 16.0 Hz, 1H), 2.44 (d, *J* = 16.4 Hz, 1H), 2.31-2.26 (m, 1H), 2.15-2.10 (m, 3H), 1.75-1.58 (m, 4H). <sup>13</sup>C NMR (100 MHz, CDCl<sub>3</sub>) δ 140.2, 140.1, 137.9, 133.4, 132.7, 128.8, 128.2, 127.9, 127.2, 126.5, 125.7, 124.8, 122.0, 70.9, 36.7, 33.8, 31.6, 29.6, 25.3, 24.1, 22.9, 22.4. HRMS calcd for C<sub>24</sub>H<sub>25</sub>O [M+H]: 329.1901 found 329.1899.

**9-cyclopropyl-7-phenyl-5,6,9,10-tetrahydro-5,9-epoxybenzo[8]annulene (7f):** Yellow solid, m.p: 90-92 °C; IR (neat)<sub>vmax</sub>: 3006, 2918, 1599, 1493, 1453, 1421, 1348, 1244, 1080 cm<sup>-1</sup>; <sup>1</sup>H NMR (400 MHz, CDCl<sub>3</sub>): δ 7.29-7.17 (m, 5H), 7.14-7.10 (m, 2H), 7.07-7.02 (m, 2H), 5.93 (d, *J* = 2.0 Hz, 1H), 5.30 (d, *J* = 5.6 Hz, 1H), 3.15-3.09 (m, 1H), 3.05 (d, *J* = 16.4 Hz, 1H), 2.65 (d, *J* = 16.0 Hz, 1H), 2.40 (16.4 Hz, 1H), 1.29-1.20 (m, 1H), 0.62-0.59 (m, 2H), 0.56-0.49 (m, 2H). <sup>13</sup>C NMR (100 MHz, CDCl<sub>3</sub>) δ 140.0, 137.9, 133.2, 132.9, 128.7, 128.2, 127.3, 126.9, 126.6, 125.7, 124.9, 124.8, 71.7, 70.8, 37.4, 33.9, 20.0, 0.32, 0.29. HRMS calcd for C<sub>21</sub>H<sub>21</sub>O [M+H]: 289.1584 found 289.1586.

**9-cyclopropyl-3-methoxy-7-phenyl-5,6,9,10-tetrahydro-5,9-epoxybenzo[8]annulene (7g):** Light yellow solid, m.p: 122-124 °C; IR (neat)<sub>vmax</sub>: 3005, 2915, 2348, 1613, 1504, 1426, 1268, 1152, 1080 cm<sup>-1</sup>; <sup>1</sup>H NMR (400 MHz, CDCl<sub>3</sub>): δ 7.30-7.17 (m, 5H), 6.95 (d, *J* = 8.4 Hz, 1H), 6.70 (dd, *J* = 8.4, 2.4 Hz, 1H), 6.59 (d, *J* = 2.8 Hz, 1H), 5.91 (d, *J* = 2.0 Hz, 1H), 5.26 (d, *J* = 6.0 Hz, 1H), 3.75 (s, 3H), 3.14-3.08 (m, 1H), 2.97 (d, *J* = 16.0 Hz, 1H), 2.59 (d, *J* = 15.6 Hz, 1H), 2.40 (d, *J* = 16.4 Hz, 1H), 1.29-1.19 (m, 1H), 0.62-0.60 (m, 2H), 0.57-0.48 (m, 2H). <sup>13</sup>C NMR (100 MHz, CDCl<sub>3</sub>) δ 157.5, 140.0, 139.0, 132.8, 129.5, 128.2, 127.3, 126.9, 125.2, 124.8, 112.7, 110.0, 72.0, 70.9, 55.2, 36.5, 33.9, 20.0, 0.32, 0.29. HRMS calcd for C<sub>22</sub>H<sub>22</sub>NaO<sub>2</sub> [M+Na]: 341.1510 found 341.1512.

**9-cyclopropyl-7-phenyl-5,6,9,10-tetrahydro-5,9-epoxycycloocta[4,5]benzo[1,2-d][1,3]dioxole (7h):** Light brown solid, m.p: 124-126 °C; IR (neat)<sub>vmax</sub>: 3006, 2914, 2361, 1504, 1483, 1379, 1235, 1085 cm<sup>-1</sup>; <sup>1</sup>H NMR (400 MHz, CDCl<sub>3</sub>): δ 7.31-7.18 (m, 5H), 6.51 (d, *J* = 9.2 Hz, 2H), 5.90 (d, *J* = 2.0 Hz, 1H), 5.87 (d, *J* = 1.2 Hz, 1H), 5.83 (d, *J* = 1.2 Hz, 1H), 5.19 (d, *J* = 6.0 Hz, 1H), 3.09-3.04 (m, 1H), 2.96 (d, *J* = 16.0 Hz, 1H), 2.53 (d, *J* = 16.0 Hz, 1H), 2.34 (d, *J* = 16.8 Hz, 1H), 1.24-1.17 (m, 1H), 0.58-0.56 (m, 2H), 0.053-0.48 (m, 2H). <sup>13</sup>C NMR (100 MHz, CDCl<sub>3</sub>)

$\delta$  146.2, 145.7, 140.0, 132.8, 130.8, 128.2, 127.3, 126.7, 126.2, 124.8, 108.4, 105.0, 100.6, 71.6, 70.8, 37.5, 33.7, 19.9, 0.30, 0.28. HRMS calcd for C<sub>22</sub>H<sub>21</sub>O<sub>3</sub> [M+H]: 333.1485 found 333.1485.

**9-cyclopropyl-7-(p-tolyl)-5,6,9,10-tetrahydro-5,9-epoxybenzo[8]annulene (7i)**: Light yellow solid, m.p: 138-140 °C; IR (neat)<sub>vmax</sub>: 3006, 2918, 2360, 1607, 1513, 1454, 1421, 1348, 1244, 1080 cm<sup>-1</sup>; <sup>1</sup>H NMR (400 MHz, CDCl<sub>3</sub>):  $\delta$  7.21 (d, *J* = 8.4 Hz, 2H), 7.15-7.05 (m, 6H), 5.91 (d, *J* = 2.4 Hz, 1H), 5.32 (d, *J* = 5.6 Hz, 1H), 3.16-3.11 (m, 1H), 3.08 (d, *J* = 16.8 Hz, 1H), 2.67 (d, *J* = 16.4 Hz, 1H), 2.41 (d, *J* = 16.8 Hz, 1H), 2.31 (s, 3H), 1.30-1.23 (m, 1H), 0.64-0.61 (m, 2H), 0.59-0.52 (m, 2H). <sup>13</sup>C NMR (100 MHz, CDCl<sub>3</sub>)  $\delta$  138.0, 137.1, 137.0, 133.2, 132.6, 128.9, 128.6, 126.5, 125.9, 125.6, 124.9, 124.6, 71.7, 70.8, 37.4, 33.9, 20.9, 20.0, 0.32, 0.29. HRMS calcd for C<sub>22</sub>H<sub>21</sub>O<sub>3</sub> [M+H]: 333.1485 found 333.1485.

**9-cyclopropyl-2-methyl-7-phenyl-5,6,9,10-tetrahydro-5,9-epoxybenzo[8]annulene (7j)**: Light yellow solid, m.p: 76-78 °C ; IR (neat)<sub>vmax</sub>: 3005, 2919, 2352, 1599, 1495, 1446, 1422, 1346, 1246, 1079 cm<sup>-1</sup>; <sup>1</sup>H NMR (400 MHz, CDCl<sub>3</sub>):  $\delta$  7.32-7.21 (m, 5H), 6.97 (s, 2H), 6.88 (s, 1H), 5.95 (d, *J* = 2.0 Hz, 1H), 5.31 (d, *J* = 5.6 Hz, 1H), 3.16-3.09 (m, 1H), 3.05 (d, *J* = 16.4 Hz, 1H), 2.64 (d, *J* = 16.4 Hz, 1H), 2.43-2.31 (m, 1H), 2.29 (s, 3H), 1.31-1.23 (m, 1H), 0.64-0.61 (m, 2H), 0.55-0.53 (m, 2H). <sup>13</sup>C NMR (100 MHz, CDCl<sub>3</sub>)  $\delta$  136.0, 135.0, 132.9, 129.1, 128.2, 127.2, 126.9, 126.5, 124.85, 124.80, 71.7, 70.7, 37.4, 34.0, 21.0, 20.0, 0.32, 0.28. HRMS calcd for C<sub>22</sub>H<sub>21</sub>O<sub>3</sub> [M+H]: 303.1749 found 303.1750.

**9-butyl-7-phenyl-5,6,9,10-tetrahydro-5,9-epoxybenzo[8]annulene (7k)**: Light yellow oil; IR (neat)<sub>vmax</sub>: 3025, 2926, 2956, 1493, 1456, 1378, 1075 cm<sup>-1</sup>; <sup>1</sup>H NMR (400 MHz, CDCl<sub>3</sub>):  $\delta$  7.33-7.04 (m, 9H), 6.03 (d, *J* = 2.0 Hz, 1H), 5.33 (d, *J* = 5.6 Hz, 1H), 3.17-3.11 (m, 1H), 3.05 (d, *J* = 16.4 Hz, 1H), 2.69 (d, *J* = 16.0 Hz, 1H), 2.43 (d, *J* = 16.8 Hz, 1H), 1.83-1.78 (m, 2H), 1.47-1.31 (m, 4H), 0.96 (t, *J* = 7.2 Hz, 3H). <sup>13</sup>C NMR (100 MHz, CDCl<sub>3</sub>)  $\delta$  140.0, 138.0, 133.2, 132.6, 128.7, 128.2, 128.1, 127.2, 126.5, 125.7, 124.9, 124.8, 72.8, 70.7, 40.7, 38.4, 33.8, 25.4, 23.2, 14.1. HRMS calcd for C<sub>22</sub>H<sub>25</sub>O [M+H]: 305.1899 found 305.1901.

**5-butyl-7-phenyl-4,5,8,9-tetrahydro-5,9-epoxycycloocta[b]thiophene (7l)**: Light yellow solid, m.p: 66-68 °C ; IR (neat)<sub>vmax</sub>: 3027, 2955, 2928, 2341, 1733, 1599, 1494, 1446, 1348, 1259, 1070 cm<sup>-1</sup>; <sup>1</sup>H NMR (400 MHz, CDCl<sub>3</sub>):  $\delta$  7.33-7.19 (m, 5H), 7.10 (d, *J* = 4.8 Hz, 1H), 6.73 (d, *J* = 4.8 Hz, 1H), 5.97 (d, *J* = 2.0 Hz, 1H), 5.44 (d, *J* = 5.6 Hz, 1H), 3.11-3.04 (m, 1H), 2.83 (d, *J* = 16.0 Hz, 1H), 2.59 (d, *J* = 16.0 Hz, 1H), 2.42 (d, *J* = 16.4 Hz, 1H), 1.79 (t, *J* = 13.6 Hz, 2H), 1.46-1.42 (m, 4H), 0.93 (t, *J* = 7.2 Hz, 3H). <sup>13</sup>C NMR (100 MHz, CDCl<sub>3</sub>)  $\delta$  140.1, 136.1, 132.8, 132.5, 128.3, 127.8, 127.3, 126.6, 124.9, 122.4, 72.8, 68.6, 40.4, 35.7, 33.6, 31.6, 29.6, 25.5, 23.2, 14.0. HRMS calcd for C<sub>20</sub>H<sub>22</sub>NaOS [M+Na]: 333.1283 found 333.1284.

**9-methyl-7-phenyl-6,9-dihydro-5H-5,9-epoxybenzo[7]annulene (7m) (two isomers are inseperable)**: Yellow solid, m.p: 118-120 °C; IR (neat)<sub>vmax</sub>: 3025, 2927, 2360, 1950, 1732, 1599, 1494, 1445, 1376, 1286, 1030 cm<sup>-1</sup>; <sup>1</sup>H NMR (400 MHz, CDCl<sub>3</sub>):  $\delta$  7.29-7.16 (m, 16H), 7.09-7.06 (m, 2H), 6.63-6.61 (m, 1H), 6.42-6.41 (m, 1H), 5.54 (d, *J* = 6.0 Hz, 1H), 5.41 (d, *J* = 4.8 Hz, 1H), 3.21-3.15 (m, 1H), 2.90 (dd, *J* = 17.2, 1.6 Hz, 1H), 2.39 (dd, *J* = 17.2, 1.6 Hz, 1H), 2.28 (dd, *J* = 17.6, 1.6 Hz, 1H), 1.78 (s, 3H), 1.76 (s, 3H). <sup>13</sup>C NMR (100 MHz, CDCl<sub>3</sub>)  $\delta$  150.7, 148.0,

145.1, 142.7, 139.5, 131.7, 131.2, 128.2, 127.4, 126.9, 126.8, 126.7, 126.5, 124.7, 120.8, 120.1, 118.1, 117.0, 81.8, 80.5, 38.3, 30.9, 29.6, 24.3, 20.5. HRMS calcd for C<sub>18</sub>H<sub>17</sub>O [M+H]: 249.1273 found 249.1274.

**2,9-dimethyl-7-phenyl-6,9-dihydro-5H-5,9-epoxybenzo[7]annulene (7n) (two isomers are inseperable):** Yellow solid, m.p: 68-70 °C; IR (neat)<sub>vmax</sub>: 3030, 2924, 1765, 1687, 1599, 1494, 1446, 1376, 1288, 1031 cm<sup>-1</sup>; <sup>1</sup>H NMR (400 MHz, CDCl<sub>3</sub>): δ 7.26-7.13 (m, 10H), 6.93 (m, 4H), 6.85 (s, 1H), 6.58 (dt, *J* = 4.8, 1.6 Hz, 2H), 6.37 (t, *J* = 1.6 Hz, 1H), 5.47 (d, *J* = 6.0 Hz, 1H), 5.34 (d, *J* = 4.8 Hz, 1H), 3.15-3.09 (m, 1H), 2.85 (dt, *J* = 17.2, 1.2 Hz, 1H), 2.32 (s, 3H), 2.30 (s, 3H), 1.73 (s, 3H), 1.71 (s, 3H). <sup>13</sup>C NMR (100 MHz, CDCl<sub>3</sub>) δ 151.0, 145.4, 139.9, 139.6, 136.4, 133.5, 131.8, 131.3, 128.2, 127.4, 127.3, 127.2, 127.0, 124.7, 124.6, 121.0, 120.5, 117.9, 117.8, 81.7, 80.4, 38.3, 31.4, 30.1, 29.6, 24.3, 21.4, 20.5. HRMS calcd for C<sub>19</sub>H<sub>18</sub>NaO [M+Na]: 285.1249 found 285.1249.

**7-phenyl-9-(p-tolyl)-5,6,9,10-tetrahydro-5,9-epoxybenzo[8]annulene (7o):** Light yellow oil; IR (neat)<sub>vmax</sub>: 3029, 2920, 2362, 1594, 1496, 1443, 1356 cm<sup>-1</sup>; <sup>1</sup>H NMR (400 MHz, CDCl<sub>3</sub>): δ 7.47 (d, *J* = 8.4 Hz, 2H), 7.19-7.14 (m, 7H), 7.11-7.05 (m, 4H), 6.13 (d, *J* = 1.6 Hz, 1H), 5.44 (d, *J* = 5.6 Hz, 1H), 3.32-3.14 (m, 2H), 3.10 (d, *J* = 16.8 Hz, 1H), 2.45 (d, *J* = 16.8 Hz, 1H), 2.29 (s, 3H). <sup>13</sup>C NMR (100 MHz, CDCl<sub>3</sub>) δ 141.9, 139.8, 137.8, 136.9, 133.1, 131.7, 129.1, 128.8, 128.6, 128.2, 127.3, 126.7, 125.9, 124.9, 124.9, 73.7, 71.2, 39.3, 33.8, 21.0. HRMS calcd for C<sub>25</sub>H<sub>22</sub>NaO [M+Na]: 361.1568 found 361.1569.

**9-(2-fluorophenyl)-7-phenyl-5,6,9,10-tetrahydro-5,9-epoxybenzo[8]annulene (7p):** Colorless oil; IR (neat)<sub>vmax</sub>: 3032, 2926, 2342, 1618, 1506, 1258 cm<sup>-1</sup>; <sup>1</sup>H NMR (400 MHz, CDCl<sub>3</sub>): δ 7.38 (td, *J* = 7.6, 1.6 Hz, 1H), 7.25 (d, *J* = 6.4 Hz, 1H), 7.16-7.06 (m, 9H), 6.98-6.93 (m, 2H), 6.49 (d, *J* = 4.8 Hz, 1H), 5.37 (d, *J* = 4.8 Hz, 1H), 3.51 (d, *J* = 14.4 Hz, 1H), 3.29 (d, *J* = 0.8 Hz, 1H), 2.83 (d, *J* = 17.6 Hz, 1H), 2.32 (dd, *J* = 16.8, 1.2 Hz, 1H). <sup>13</sup>C NMR (100 MHz, CDCl<sub>3</sub>) δ 162.5, 160.1, 148.1, 143.9, 133.7, 133.1 (d, *J<sub>F</sub>* = 3.8 Hz), 128.3, 128.3, 128.2, 127.4, 126.9 (d, *J<sub>F</sub>* = 9.5 Hz), 126.7, 124.7, 123.8 (d, *J<sub>F</sub>* = 3.8 Hz), 123.2, 123.0, 120.5, 118.1, 115.1, 114.9, 84.2, 76.2, 35.4, 35.2. HRMS calcd for C<sub>24</sub>H<sub>19</sub>NaO [M+Na]: 365.1317 found 365.1319.

## X-ray Structures

### 1. Compound 6d

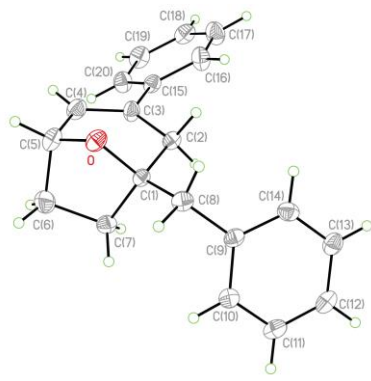

2. Compound 7i

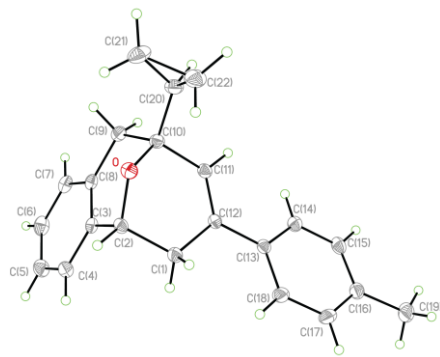

3. Compound 7d

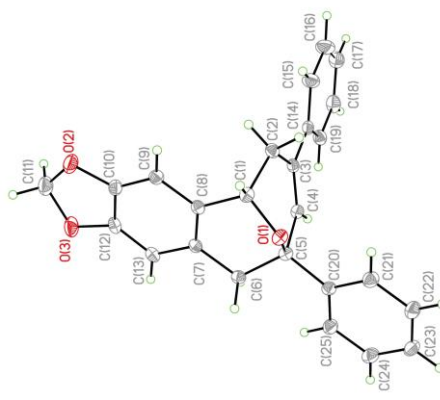

4. Compound 7m

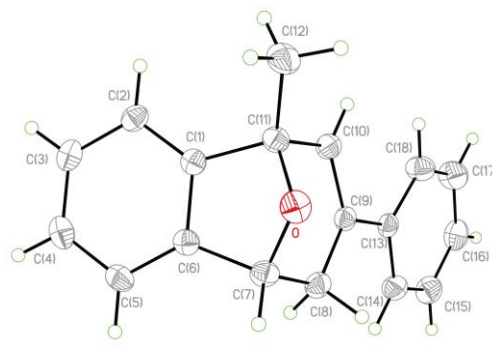



Jaya-BC2014-100

Pulse Sequence: s2pu1

Mercury-400BB "MercuryPlus400"

Date: Jun 9 2015

Solvent: CDCl<sub>3</sub>

Ambient temperature

Total 32 repetitions

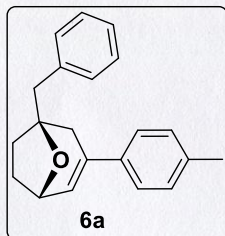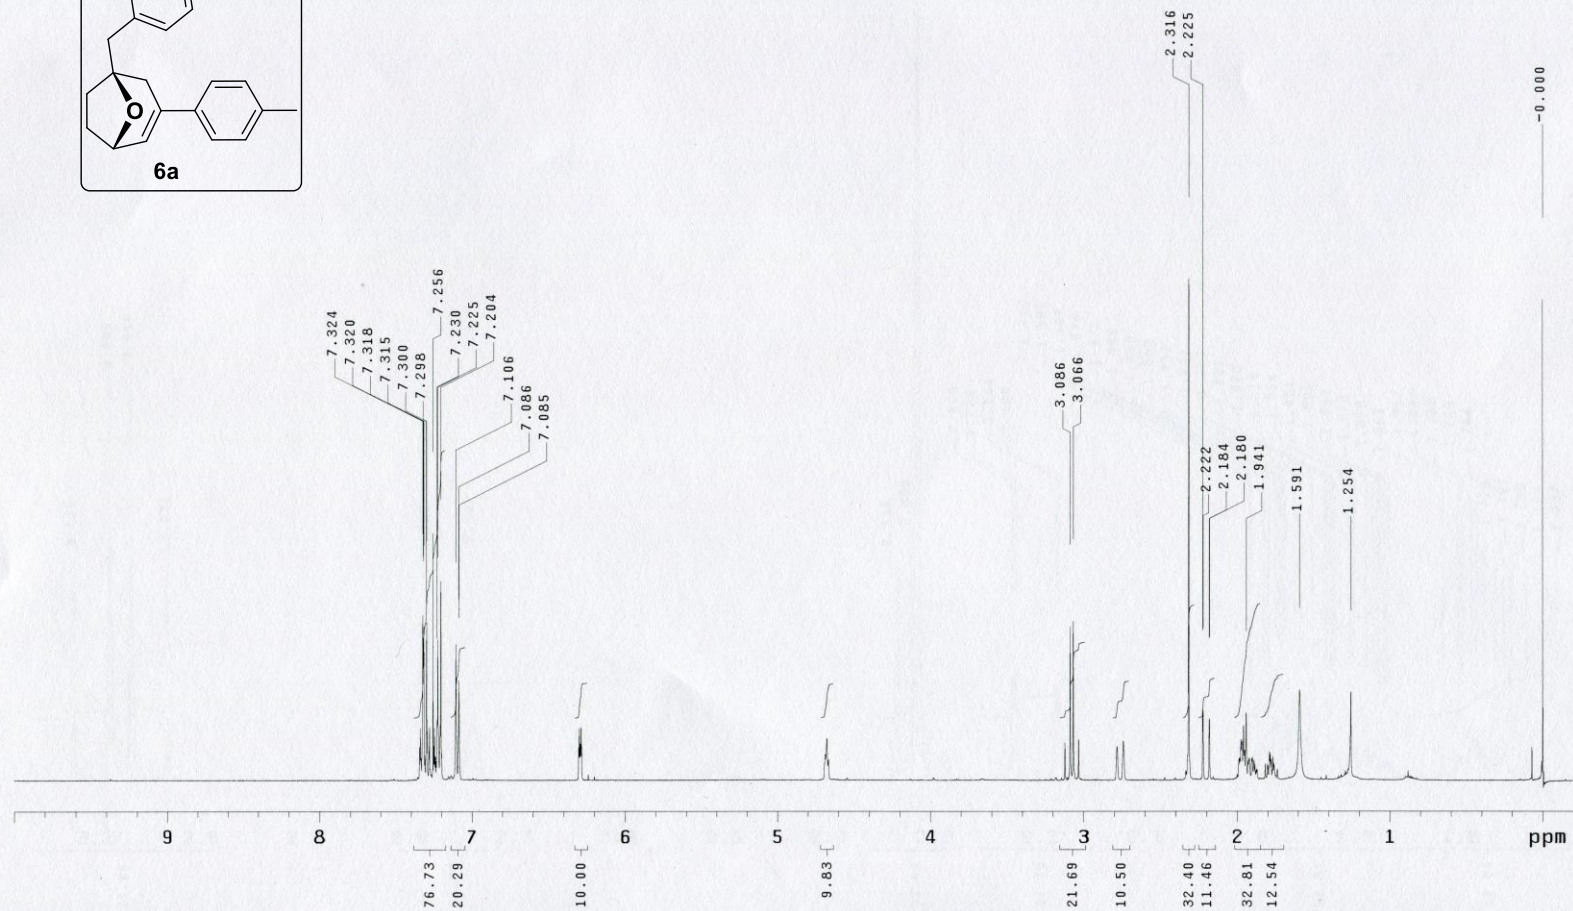

Jaya-BC2014-100

Pulse Sequence: s2pu1

Mercury-400BB "MercuryPlus400"

Date: Jun 8 2015

Solvent: CDCl<sub>3</sub>

Ambient temperature

Total 3360 repetitions

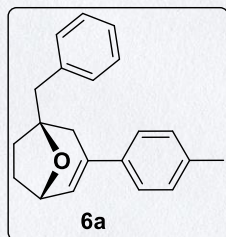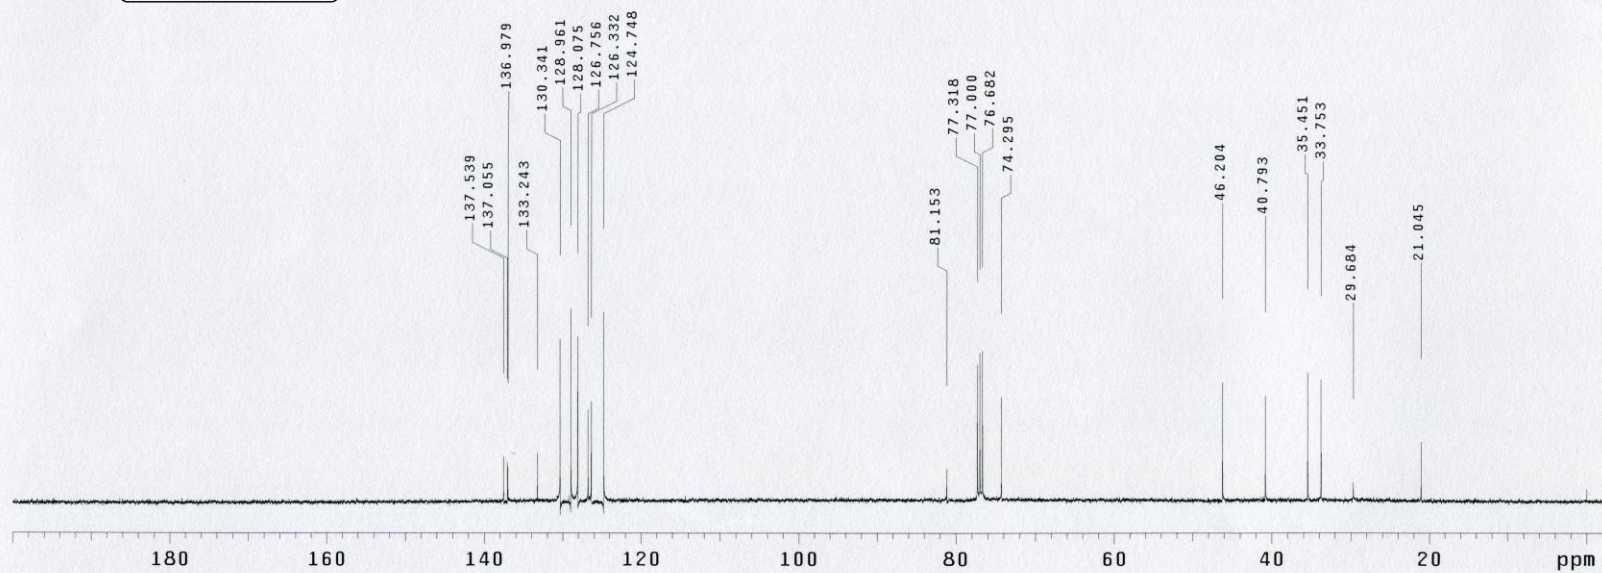

Jaya-BC2014-100

Pulse Sequence: DEPT

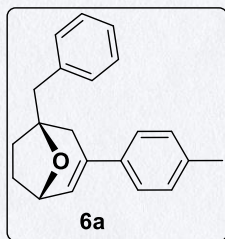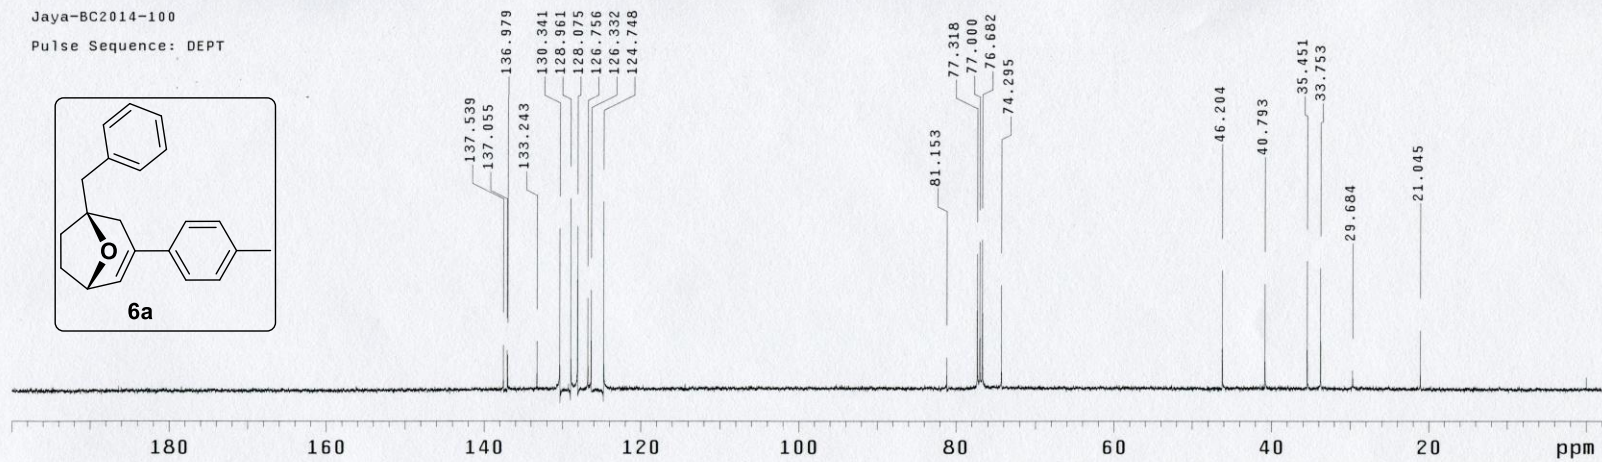

phph0008

Pulse Sequence: s2pu1

Mercury-400BB "MercuryPlus400"

Date: Sep 17 2014

Solvent: CDCl<sub>3</sub>

Ambient temperature

Total 32 repetitions

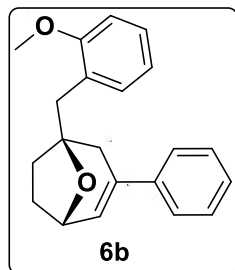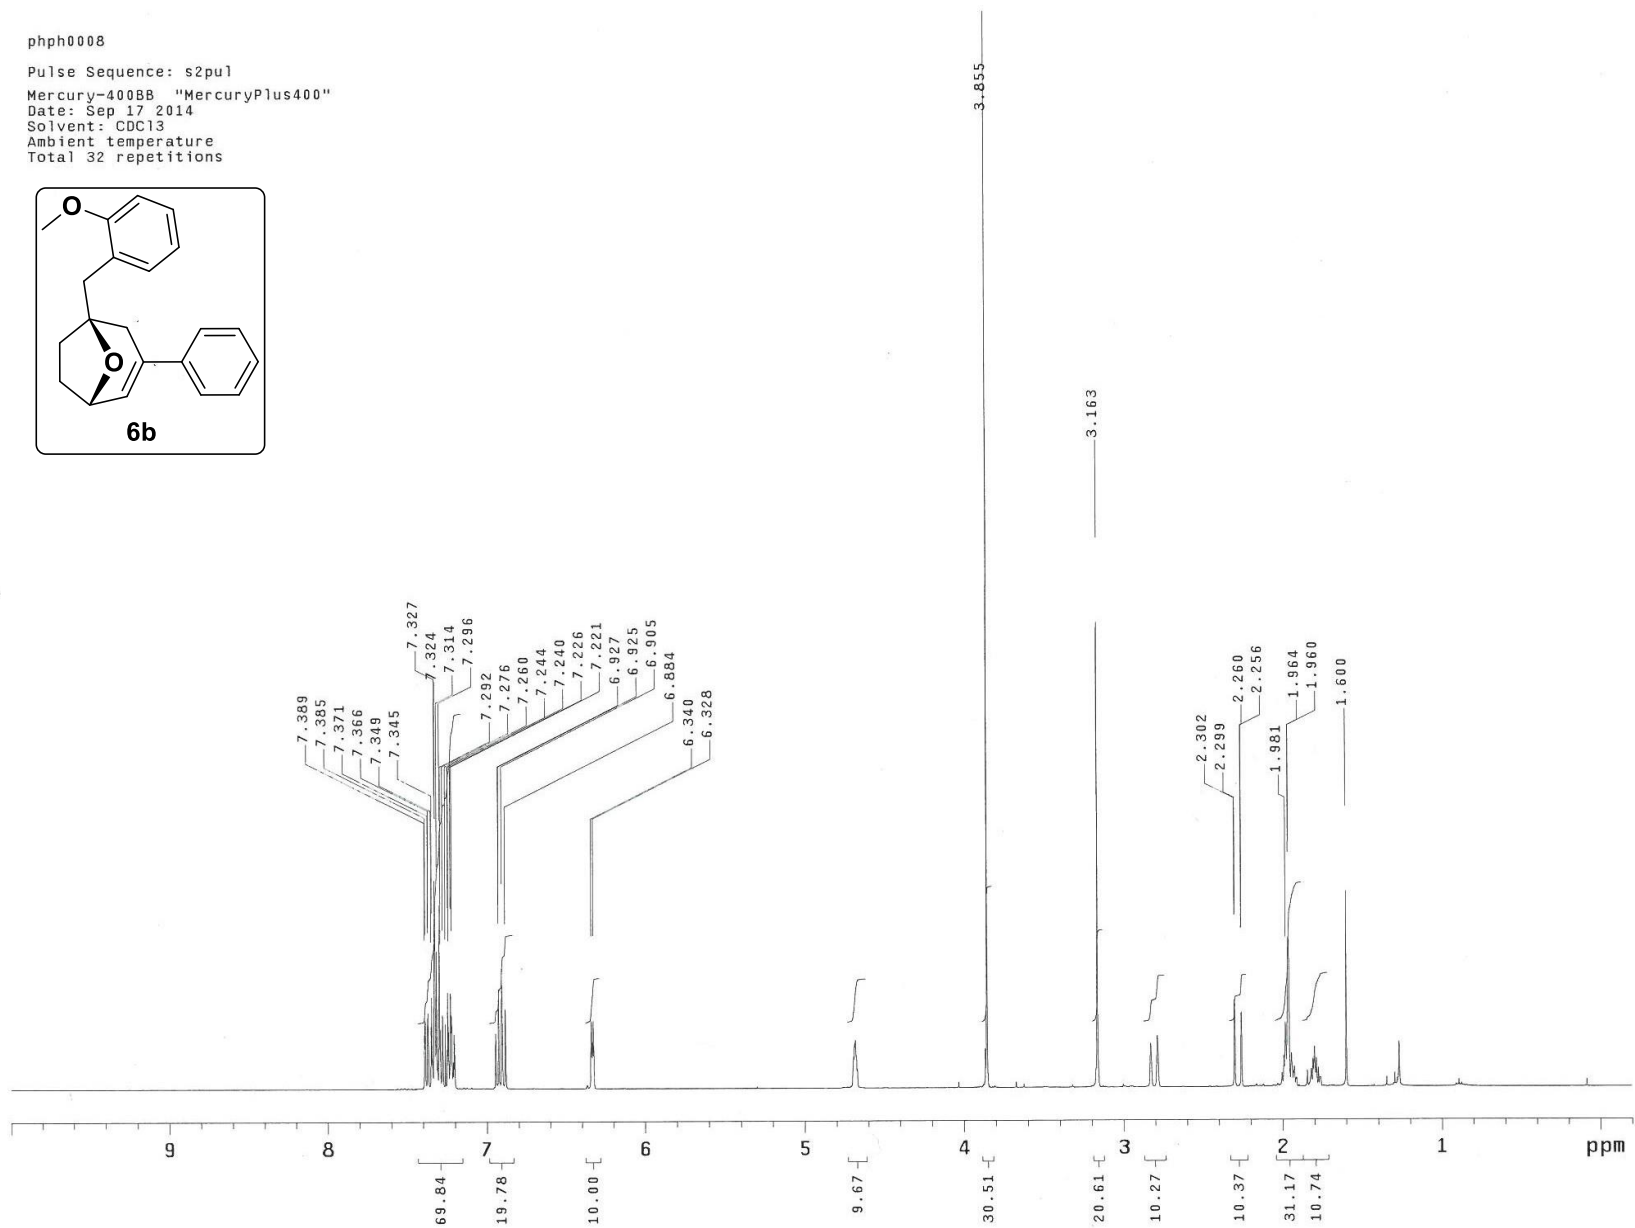

phph0008

Pulse Sequence: s2pu1

Mercury-400BB "MercuryPlus400"

Date: Sep 17 2014

Solvent: CDCl<sub>3</sub>

Ambient temperature

Total 1504 repetitions

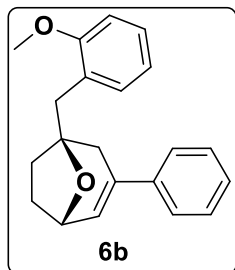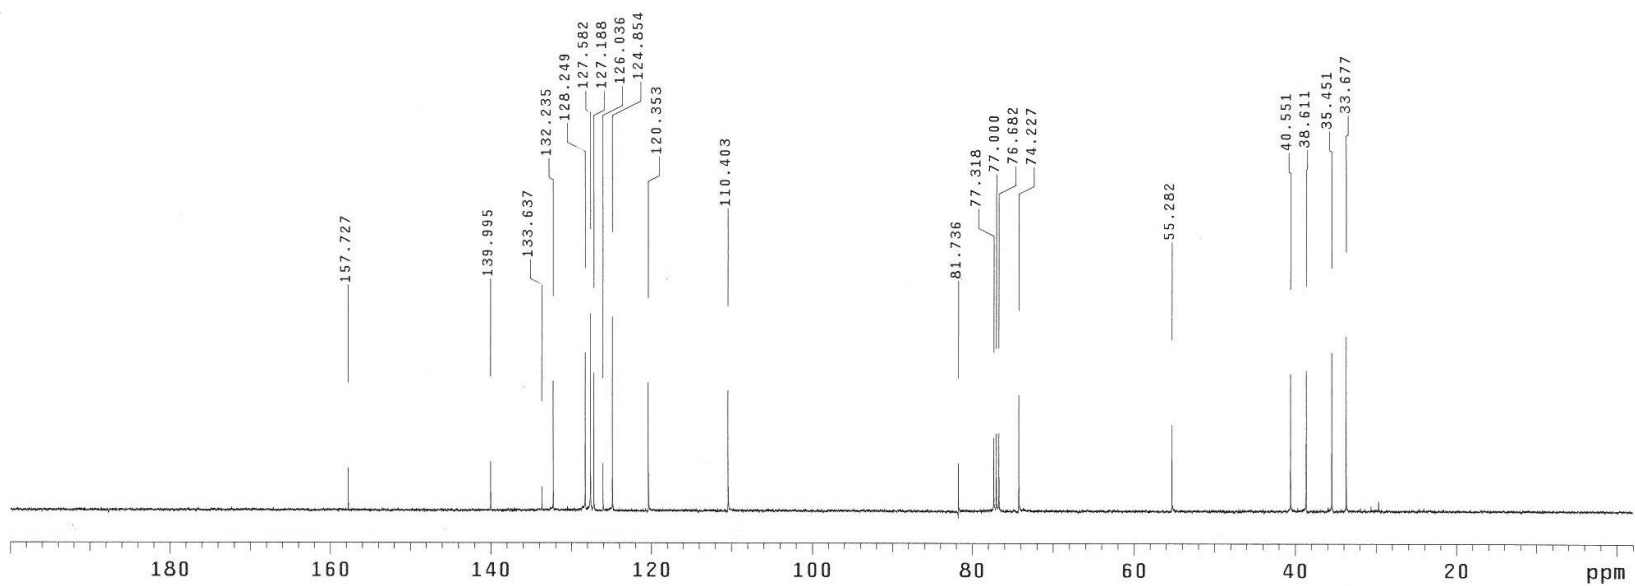

phph0008

Pulse Sequence: DEPT

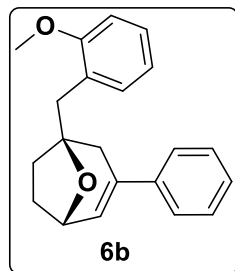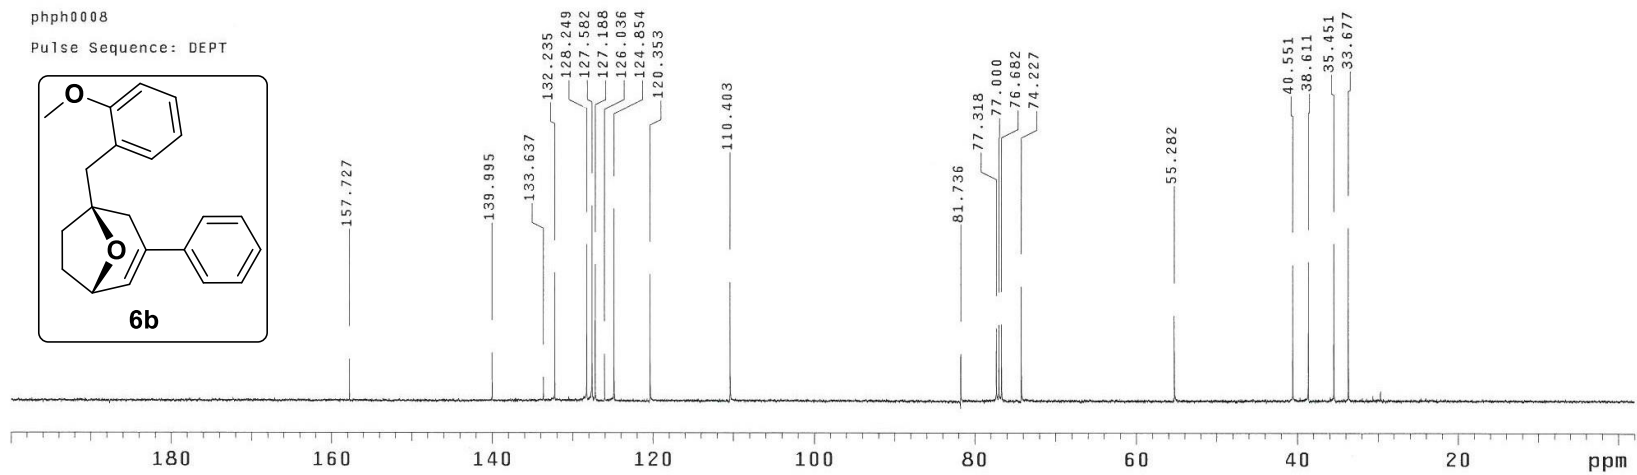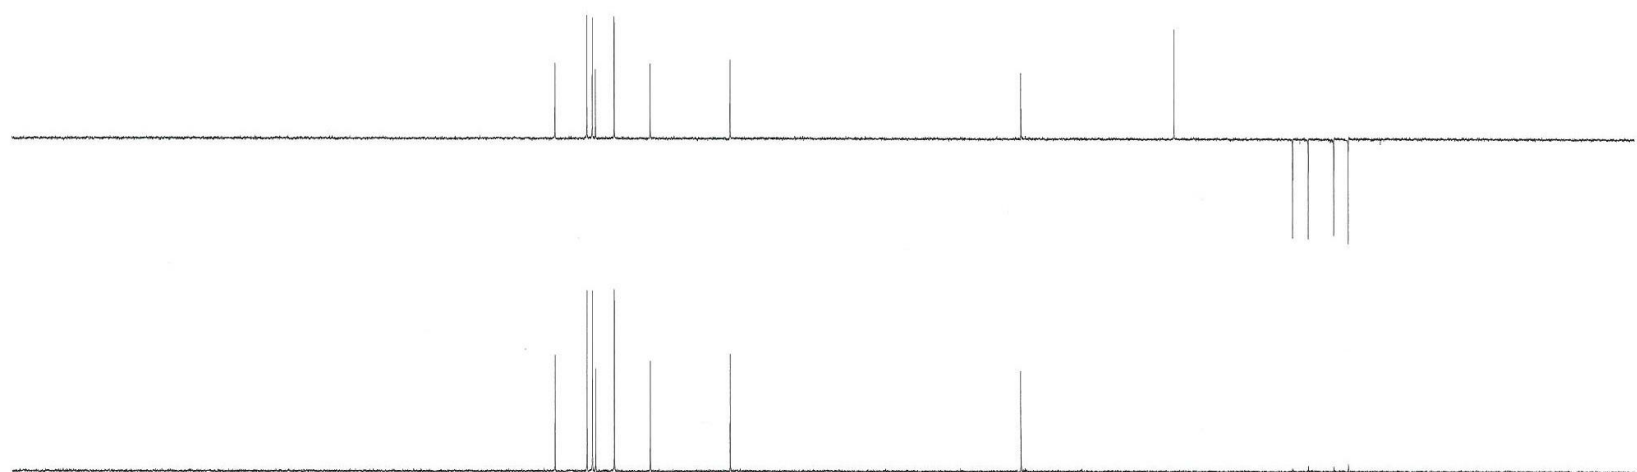

Jaya-BC2014-98-1

Pulse Sequence: s2pu1

Mercury-400BB "MercuryPlus400"

Date: Dec 25 2014

Solvent: CDCl3

Ambient temperature

Total 32 repetitions

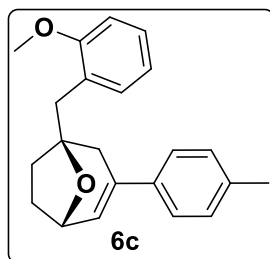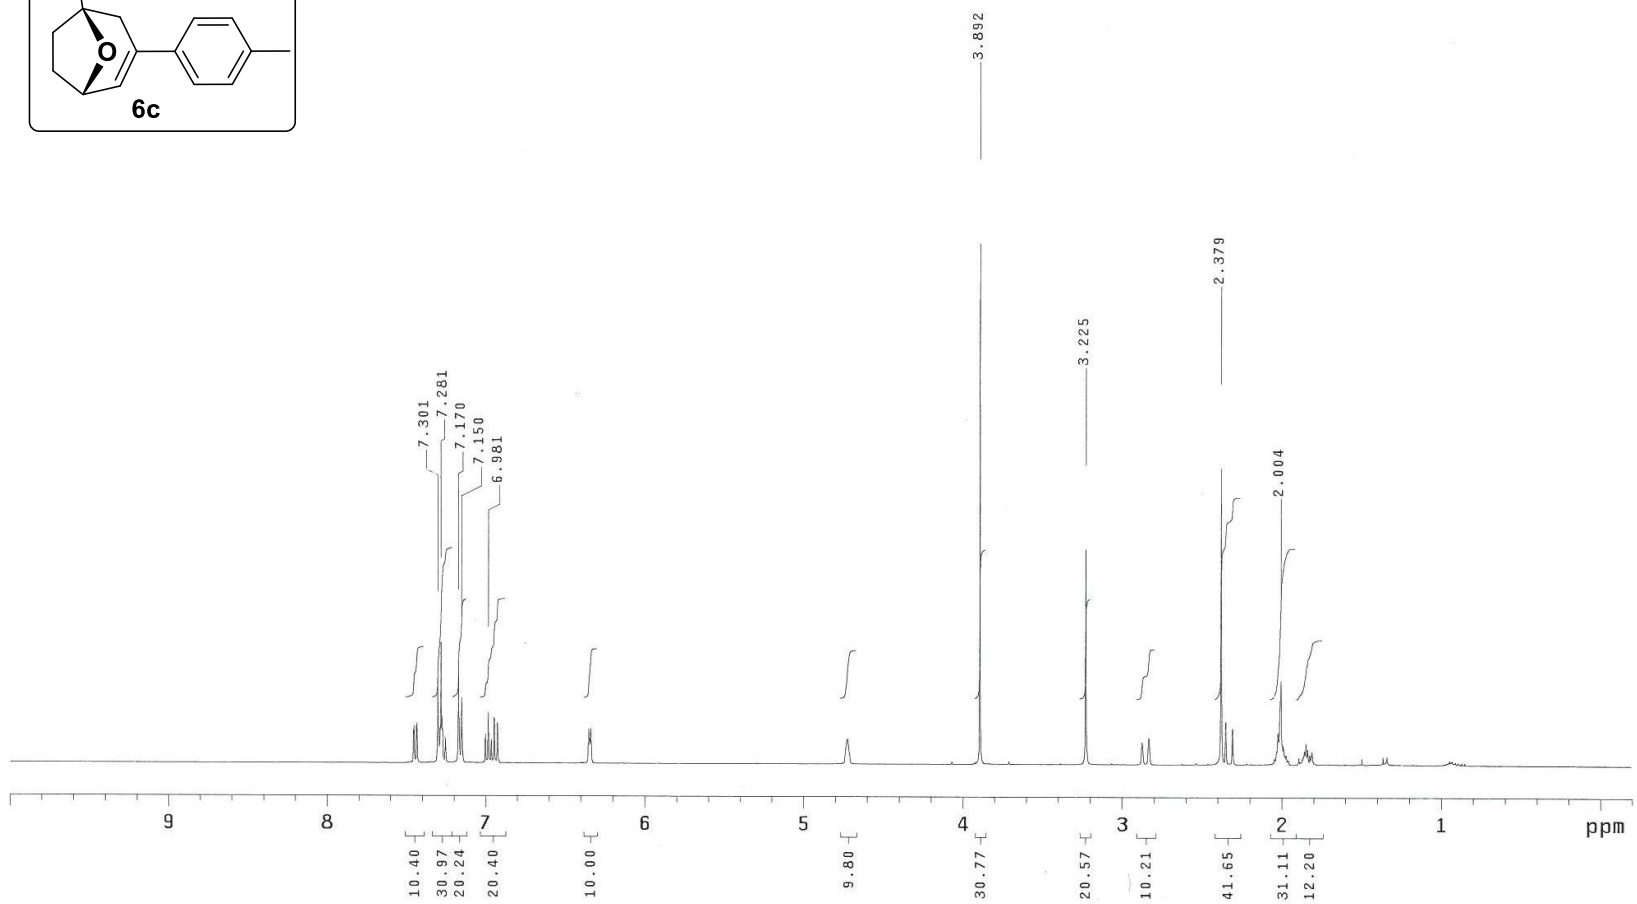

Jaya-BC2014-98-1

Pulse Sequence: s2pu1

Mercury-400BB "MercuryPlus400"

Date: Dec 25 2014

Solvent: CDCl3

Ambient temperature

Total 64000 repetitions

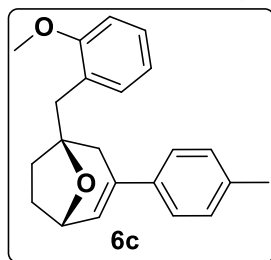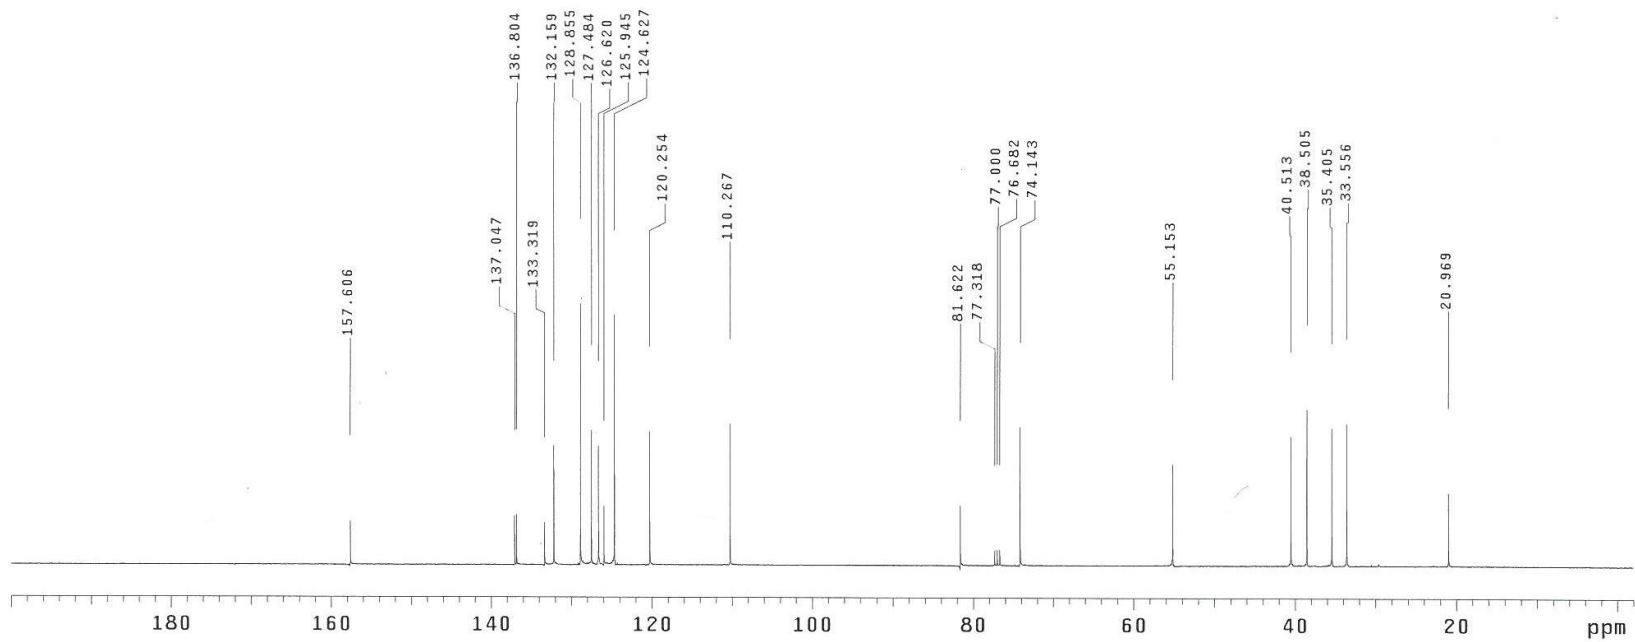



Jaya-BC2014-98-1

Pulse Sequence: DEPT

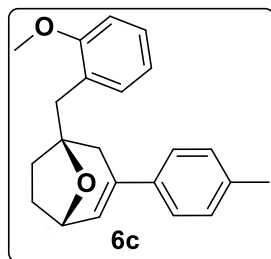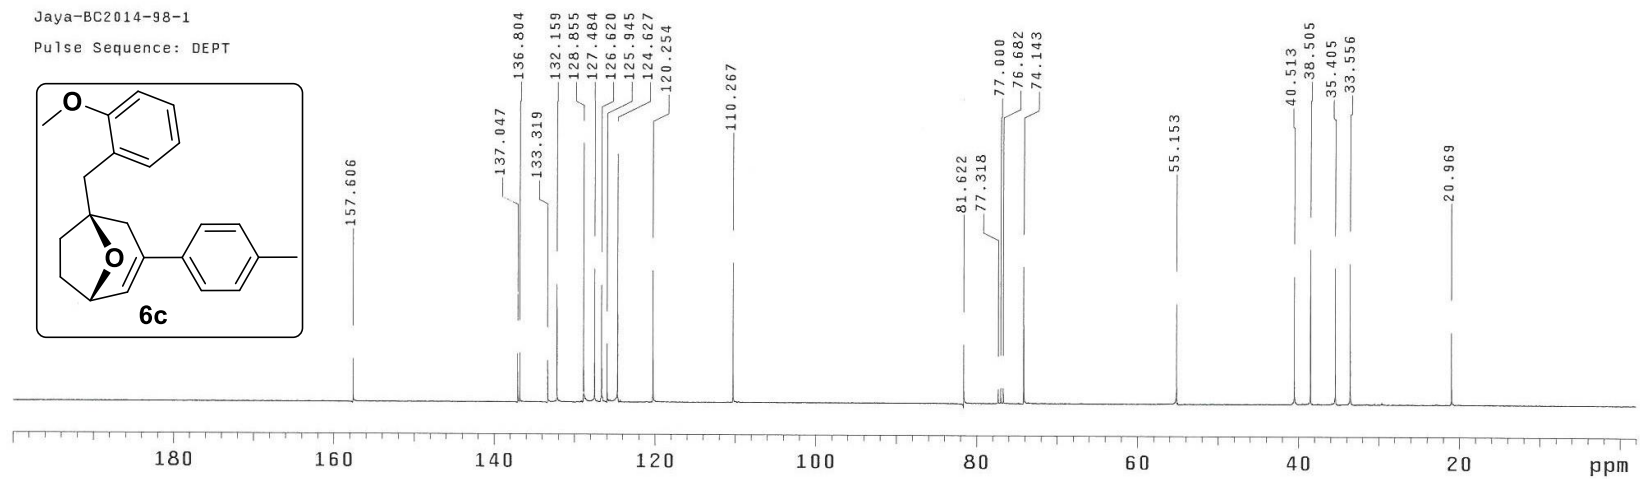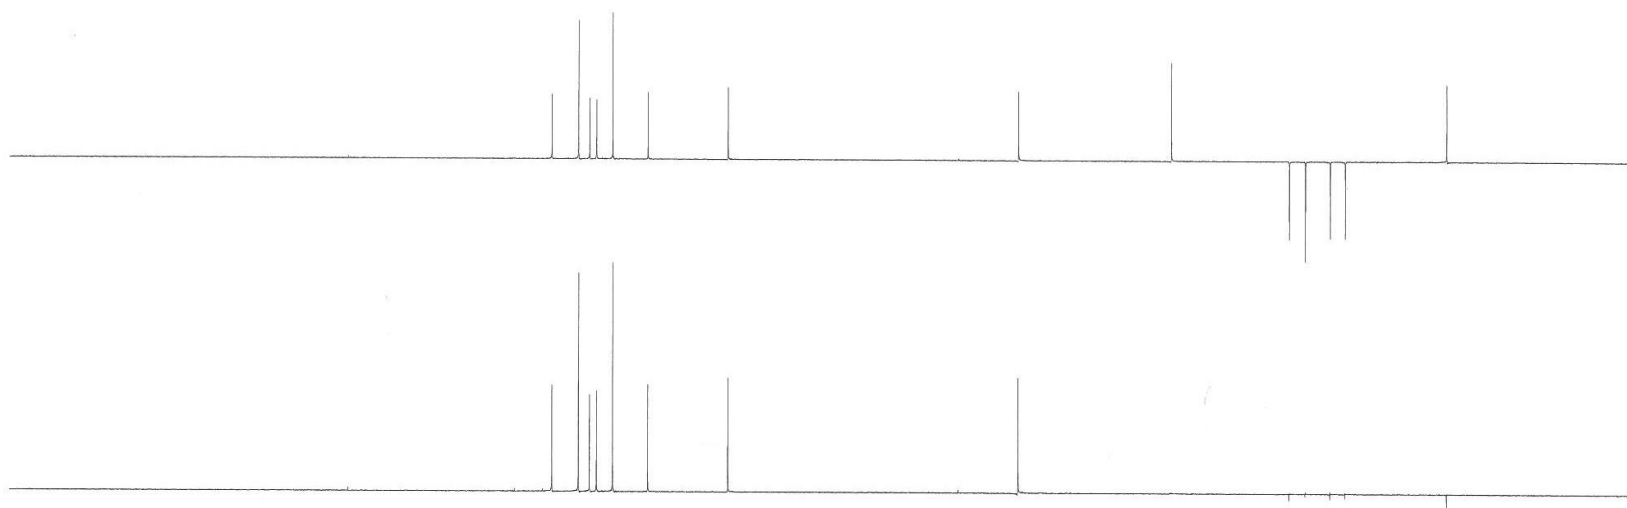

Milu-2014-P088A

Pulse Sequence: s2pu1

Mercury-400BB "MercuryPlus400"

Date: Jun 26 2014

Solvent: CDCl<sub>3</sub>

Ambient temperature

Total 32 repetitions

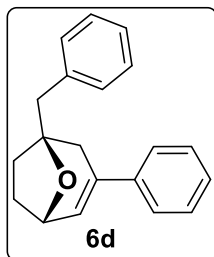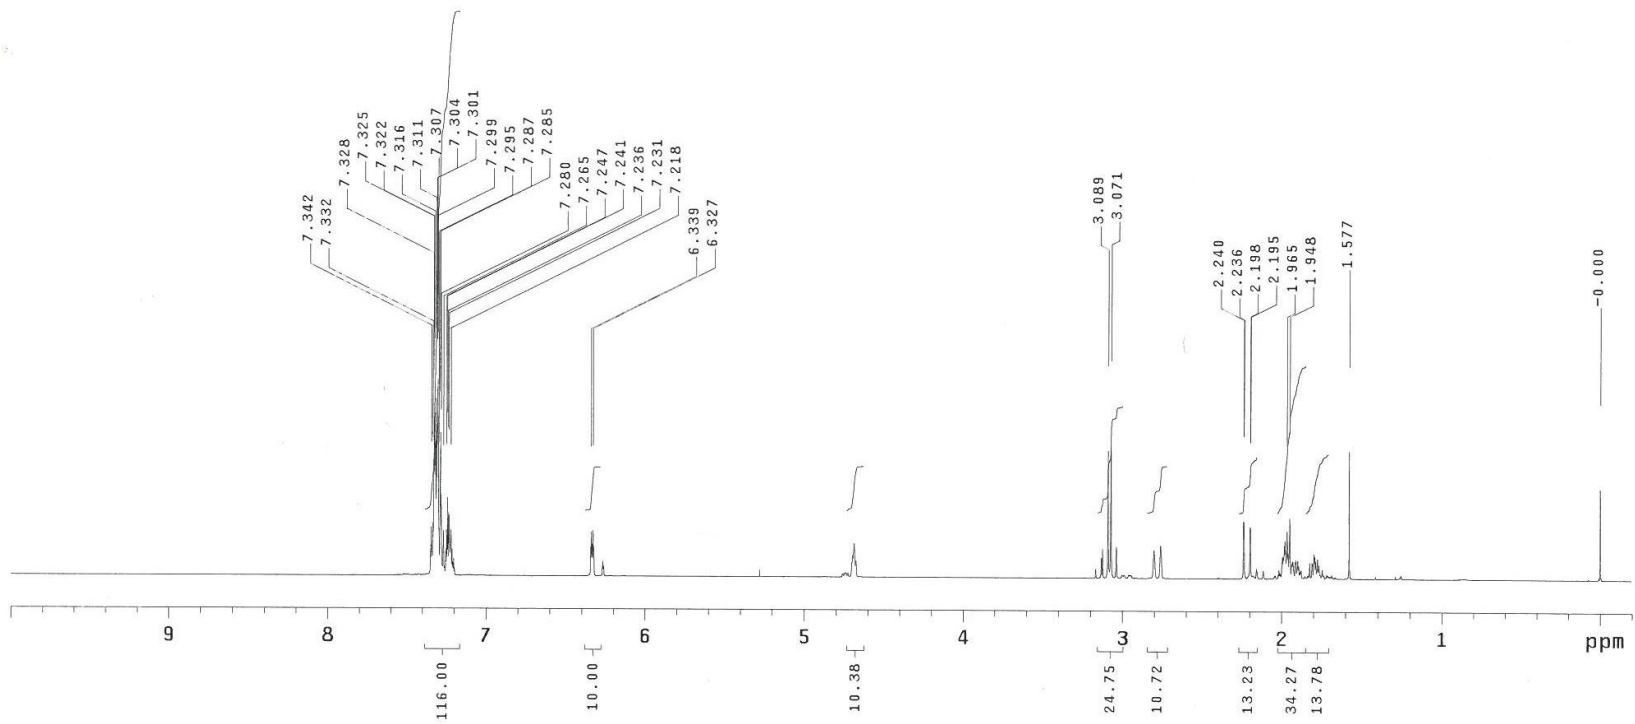

Milu-2014-P088A

Pulse Sequence: s2pu1

Mercury-400BB "MercuryPlus400"

Date: Jun 26 2014

Solvent: CDCl<sub>3</sub>

Ambient temperature

Total 1072 repetitions

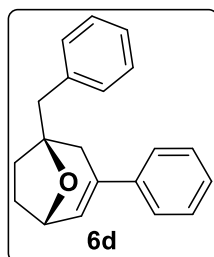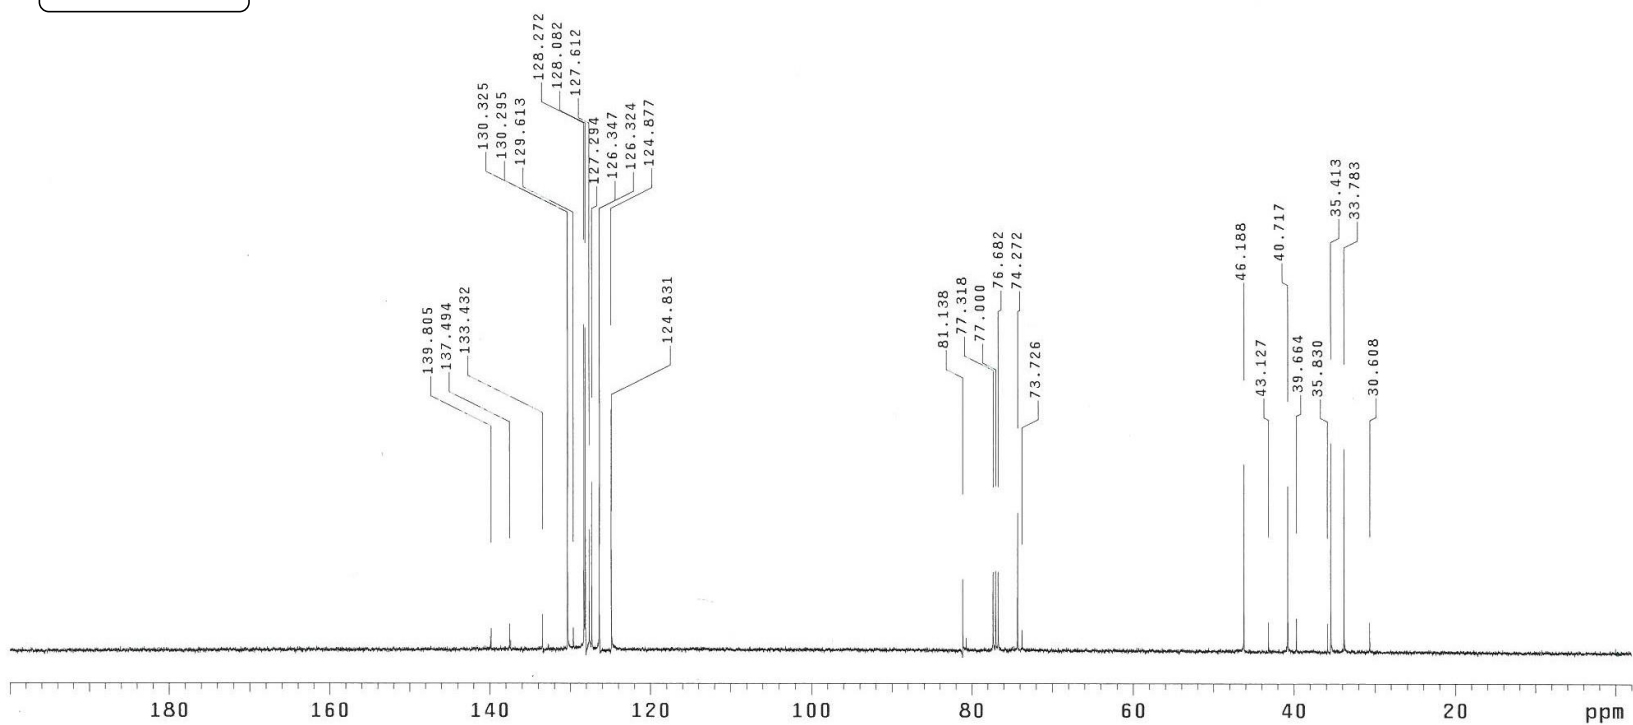

Milu-2014-P088A

Pulse Sequence: DEPT

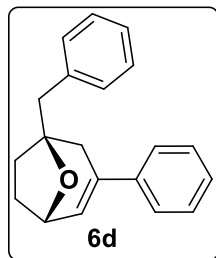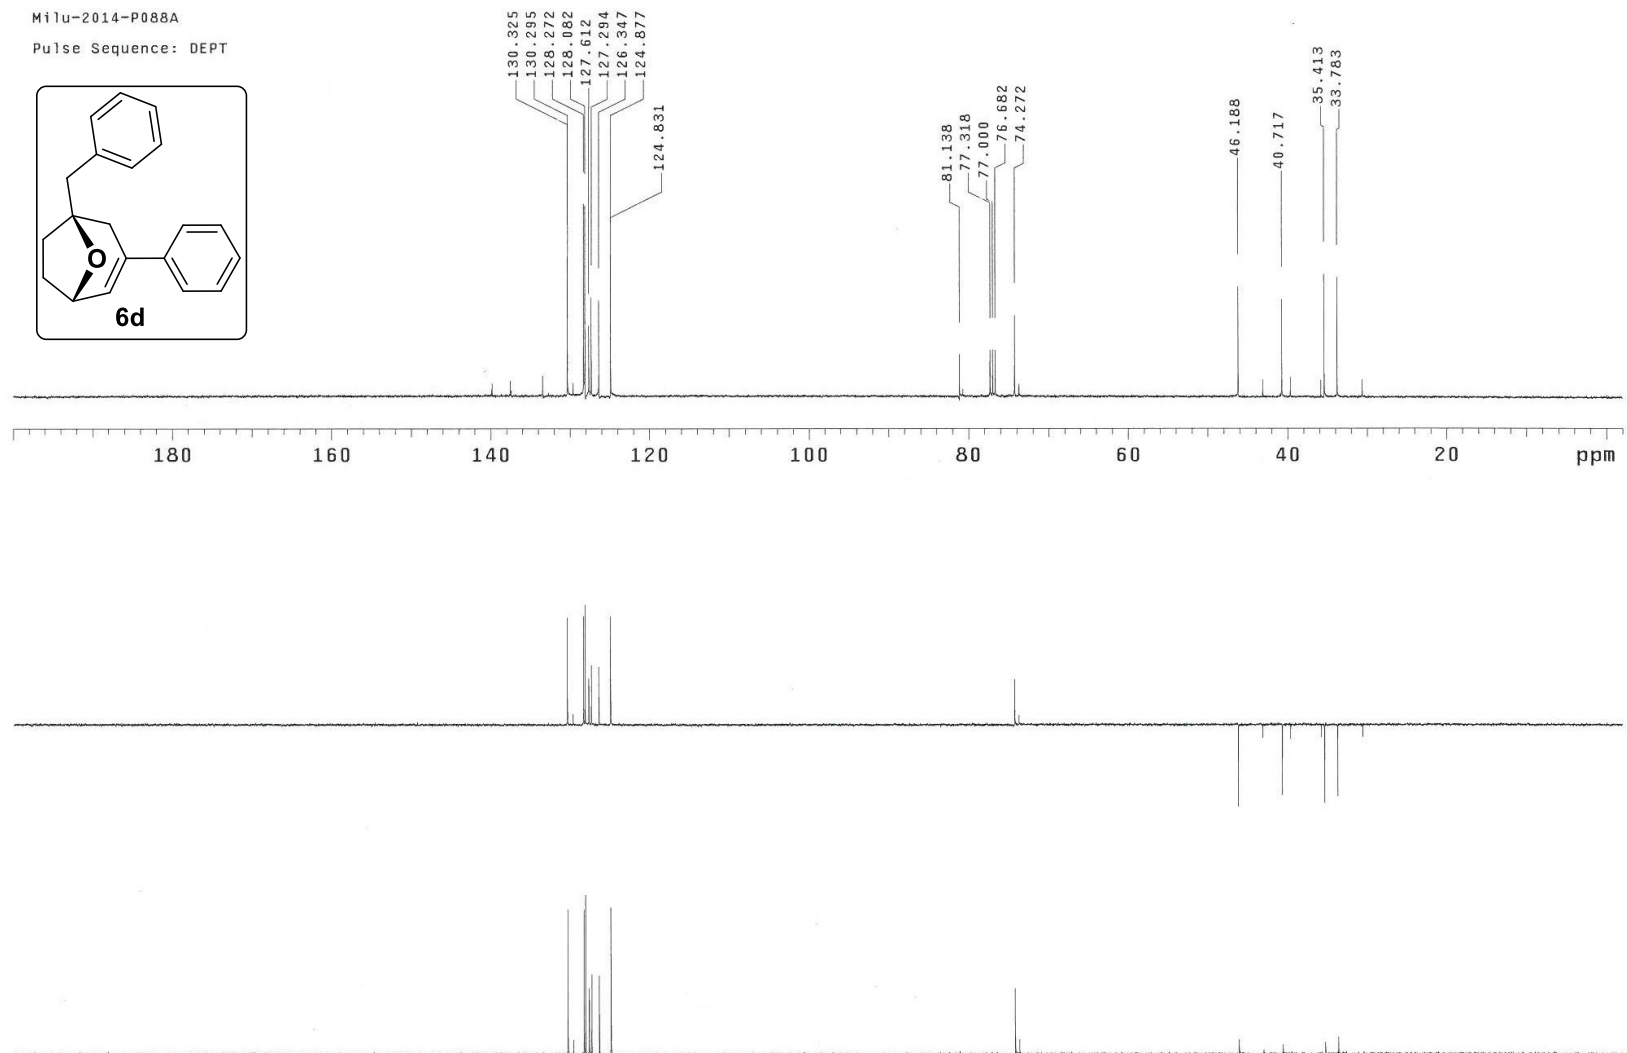

Jaya-20141225-1

Pulse Sequence: s2pu1

Mercury-400BB "MercuryPlus400"

Date: Jun 8 2015

Solvent: CDCl3

Ambient temperature

Total 48 repetitions

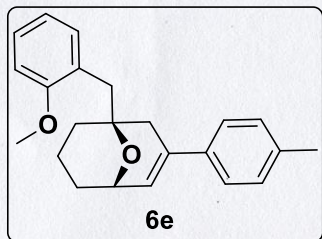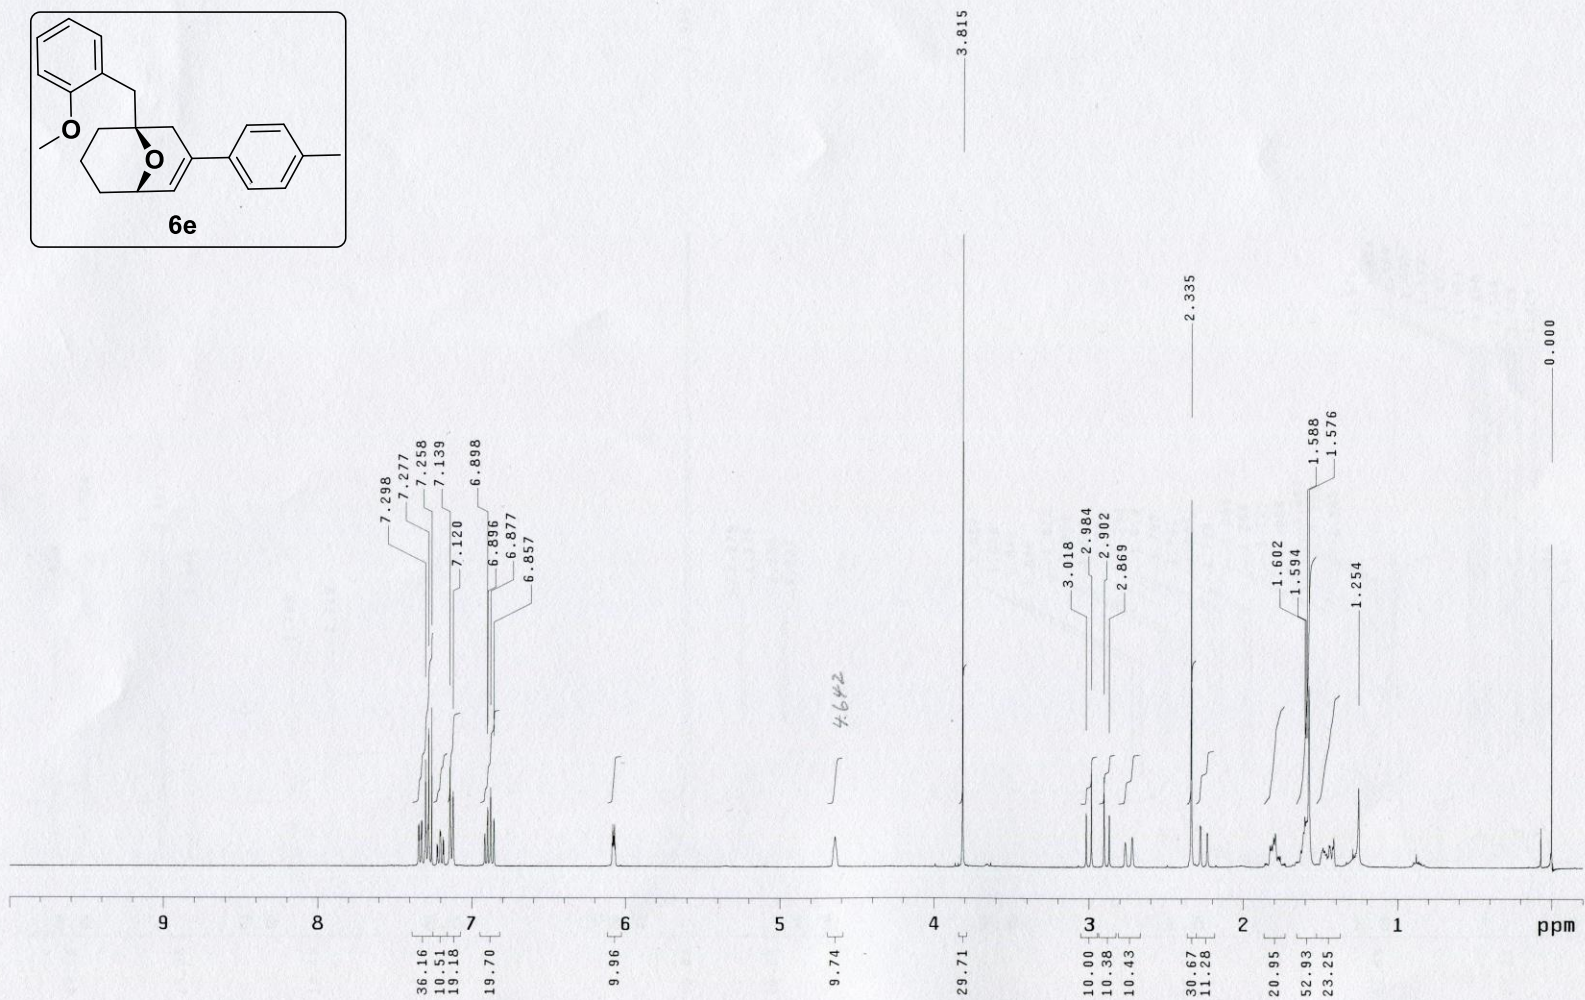

Jaya-20141225-1

Pulse Sequence: s2pu1

Mercury-400BB "MercuryPlus400"

Date: Jun 8 2015

Solvent: CDCl<sub>3</sub>

Ambient temperature

Total 3584 repetitions

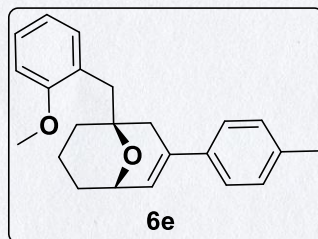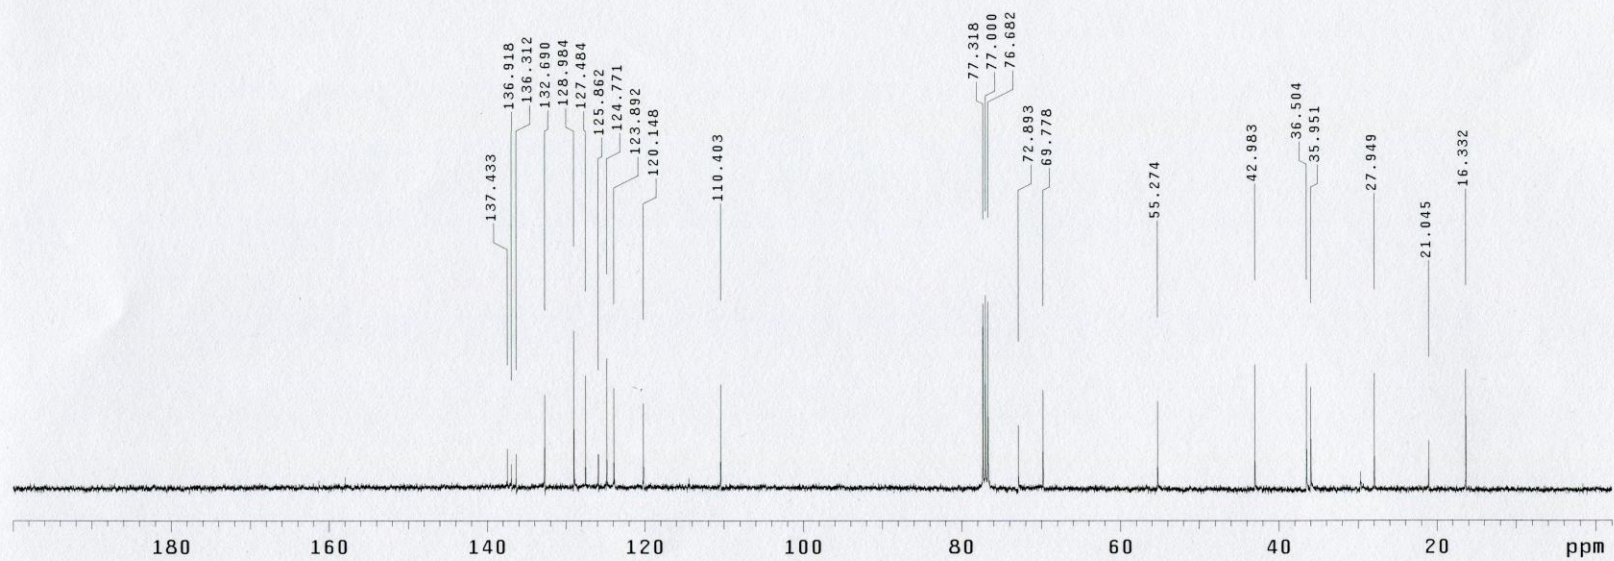

Jaya-20141225-1

Pulse Sequence: DEPT

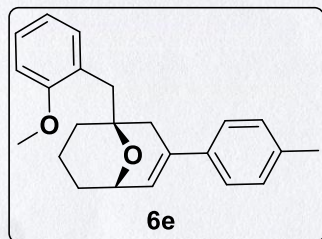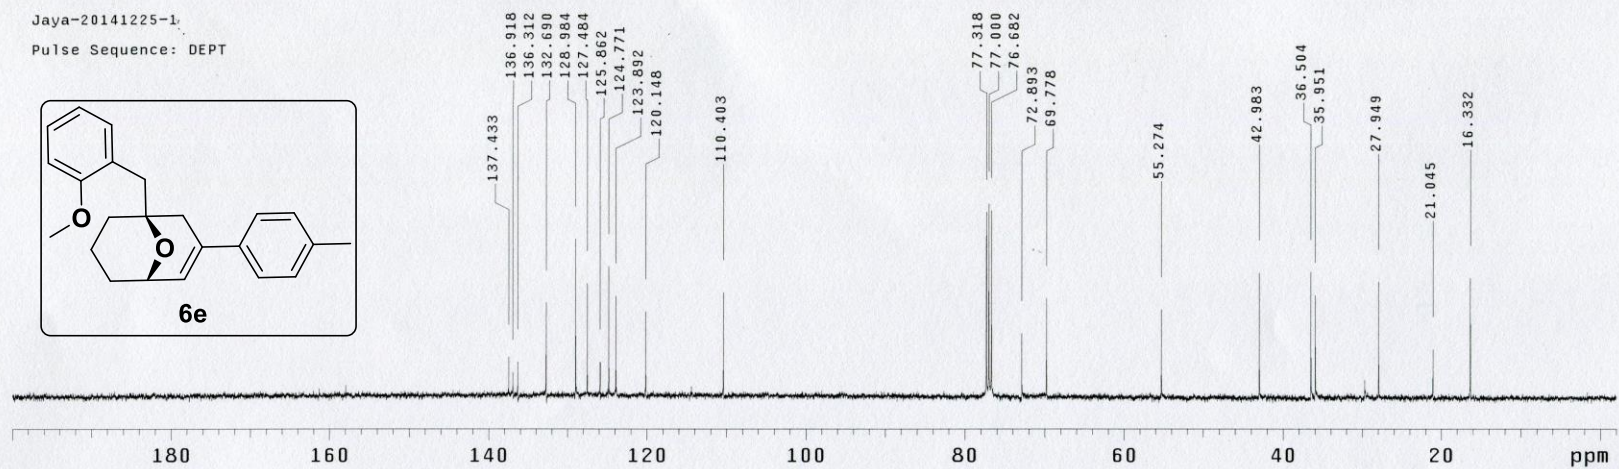

phph0009

Pulse Sequence: s2pu1

Mercury-400BB "MercuryPlus400"

Date: Sep 17 2014

Solvent: CDCl3

Ambient temperature

Total 32 repetitions

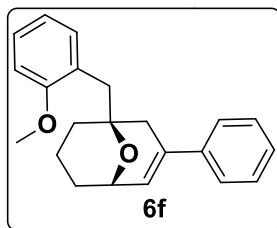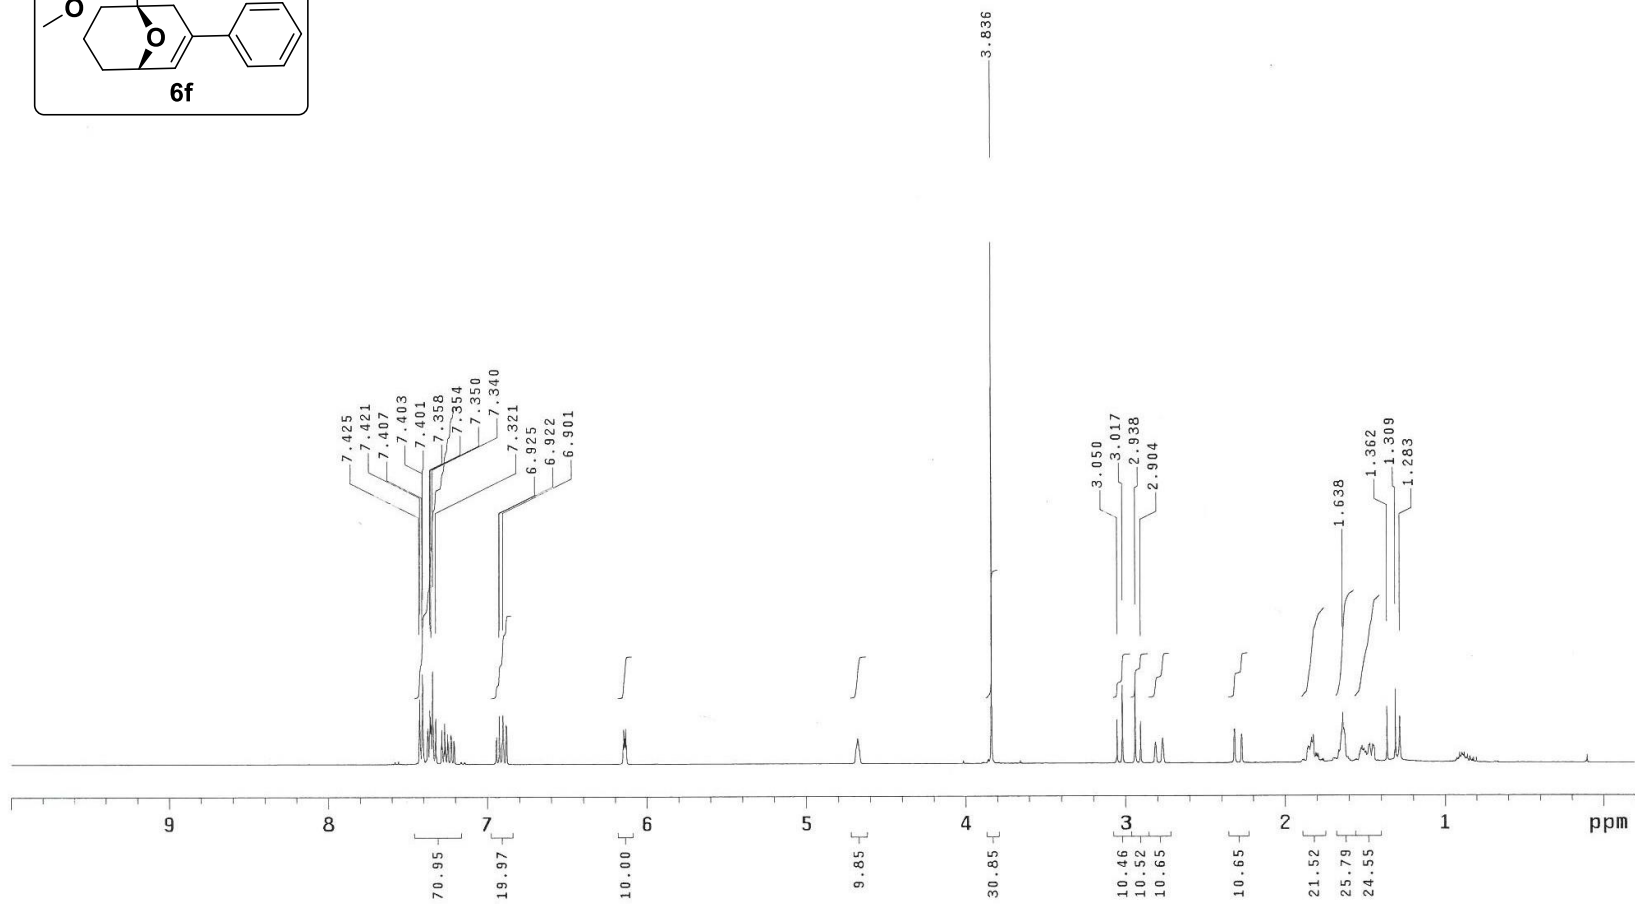



phph0009

Pulse Sequence: s2pu1

Mercury-400BB "MercuryPlus400"

Date: Sep 17 2014

Solvent: CDC13

Ambient temperature

Total 64000 repetitions

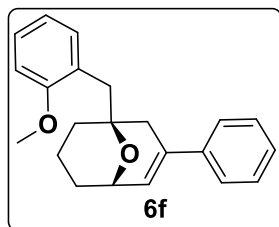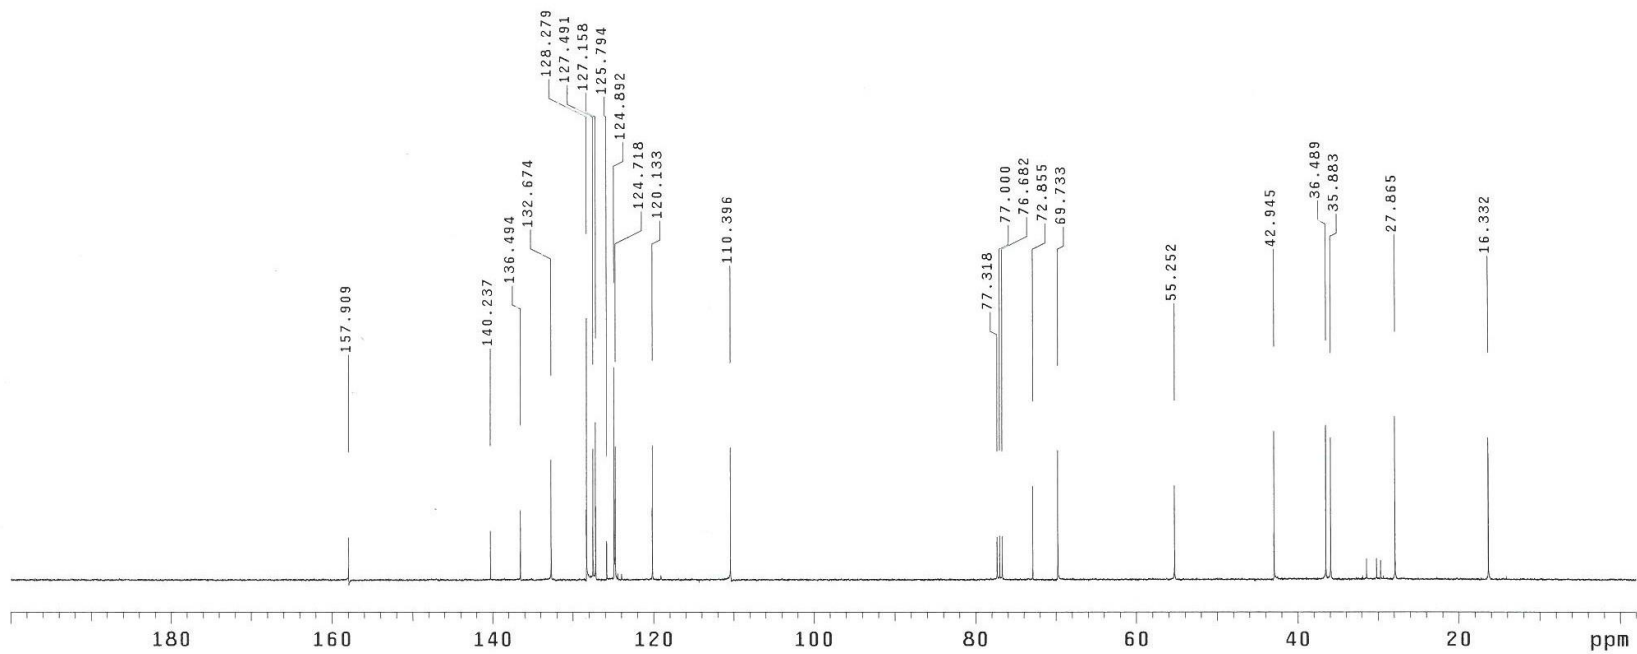

phph0009

Pulse Sequence: DEPT

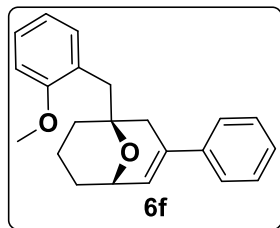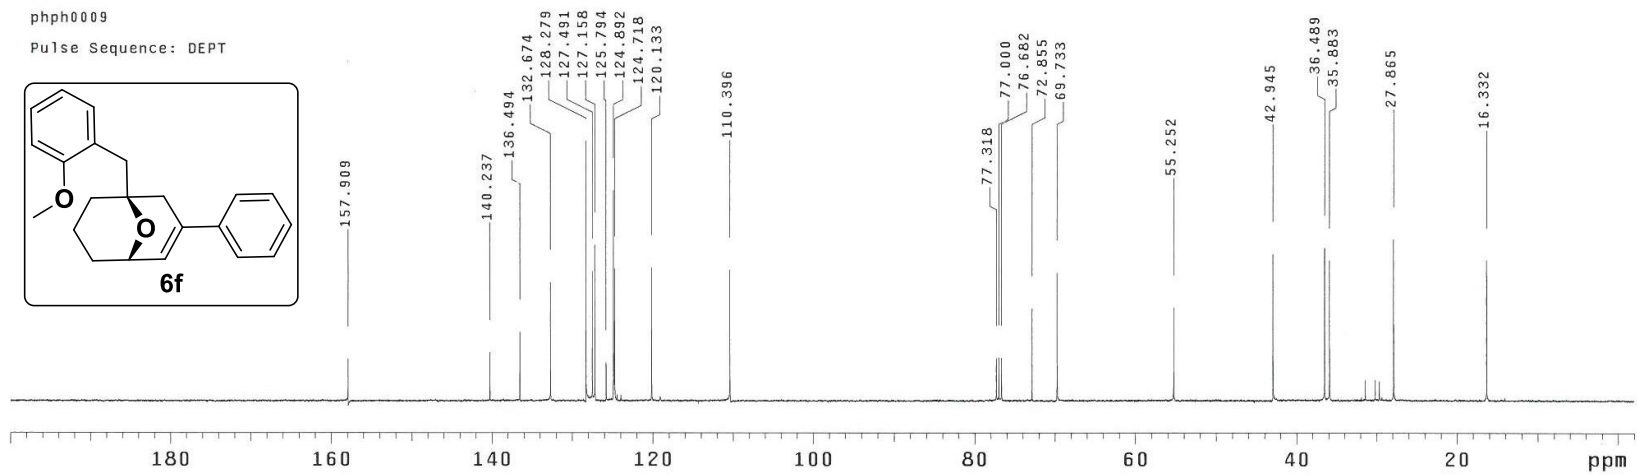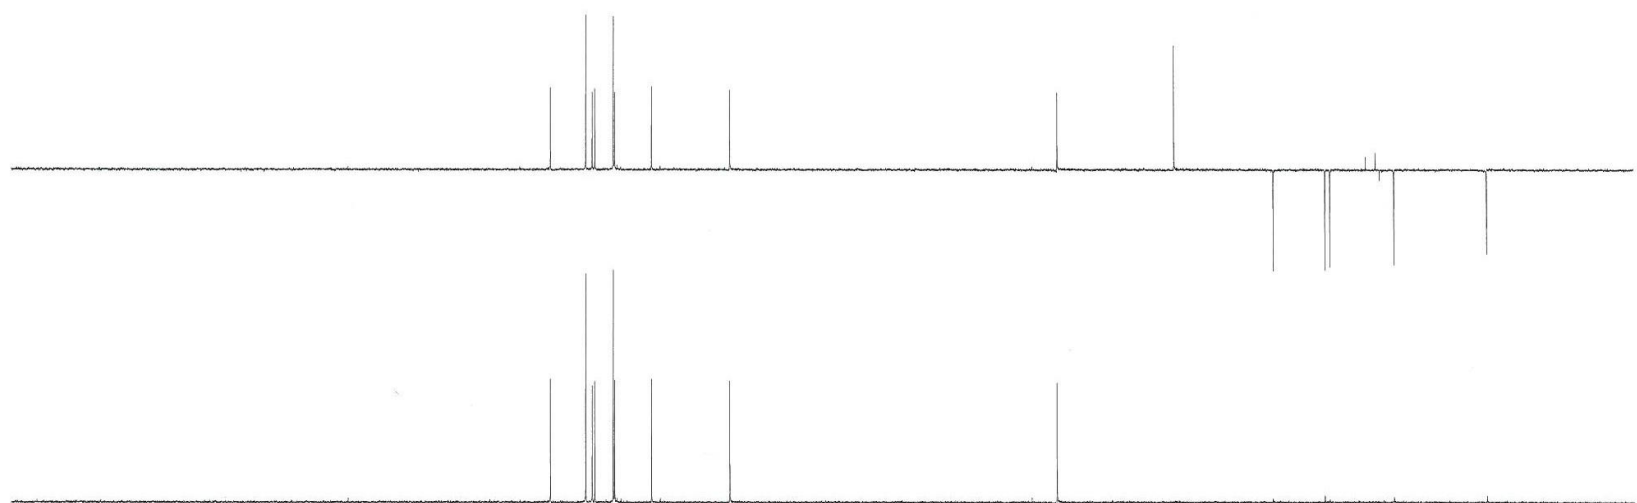

Filename = 104-106-106A\_Proton-1-3. jd  
 Author = delta  
 Experiment = proton.jxp  
 Sample\_Id = 104-106-106A  
 Solvent = CHLOROFORM-D  
 Creation\_Time = 1-JUN-2015 14:22:05  
 Revision\_Time = 1-JUN-2015 14:47:45  
 Current\_Time = 1-JUN-2015 14:47:57

Comment = single\_pulse  
 Data\_Format = 1D COMPLEX  
 Dim\_Size = 13107  
 Dim\_Title = Proton  
 Dim\_Units = [ppm]  
 Dimensions = X  
 Site = JNM-ECS400  
 Spectrometer = DELTA2\_NMR

Field\_Strength = 9.389766[T] (400[MHz])  
 X\_Acq\_Duration = 2.18365952[s]  
 X\_Domain = 1H  
 X\_Freq = 399.78219838[MHz]  
 X\_Offset = 5[ppm]  
 X\_Points = 16384  
 X\_Prescans = 1  
 X\_Resolution = 0.45794685[Hz]  
 X\_Sweep = 7.5030012[kHz]  
 X\_Sweep\_Clipped = 6.00240096[kHz]  
 Irr\_Domain = Proton  
 Irr\_Freq = 399.78219838[MHz]  
 Irr\_Offset = 5[ppm]  
 Tri\_Domain = Proton  
 Tri\_Freq = 399.78219838[MHz]  
 Tri\_Offset = 5[ppm]  
 Clipped = FALSE  
 Scans = 8  
 Total\_Scans = 8

Relaxation\_Delay = 5[s]  
 Recvr\_Gain = 16  
 Temp\_Get = 22.4[dC]  
 X\_90\_Width = 12.031[us]  
 X\_Acq\_Time = 2.18365952[s]  
 X\_Angle = 45[deg]  
 X\_Atn = 2.4[dB]  
 X\_Pulse = 6.0155[us]  
 Irr\_Mode = Off  
 Tri\_Mode = Off  
 Dante\_Presat = FALSE  
 Initial\_Wait = 1[s]  
 Repetition\_Time = 7.18365952[s]

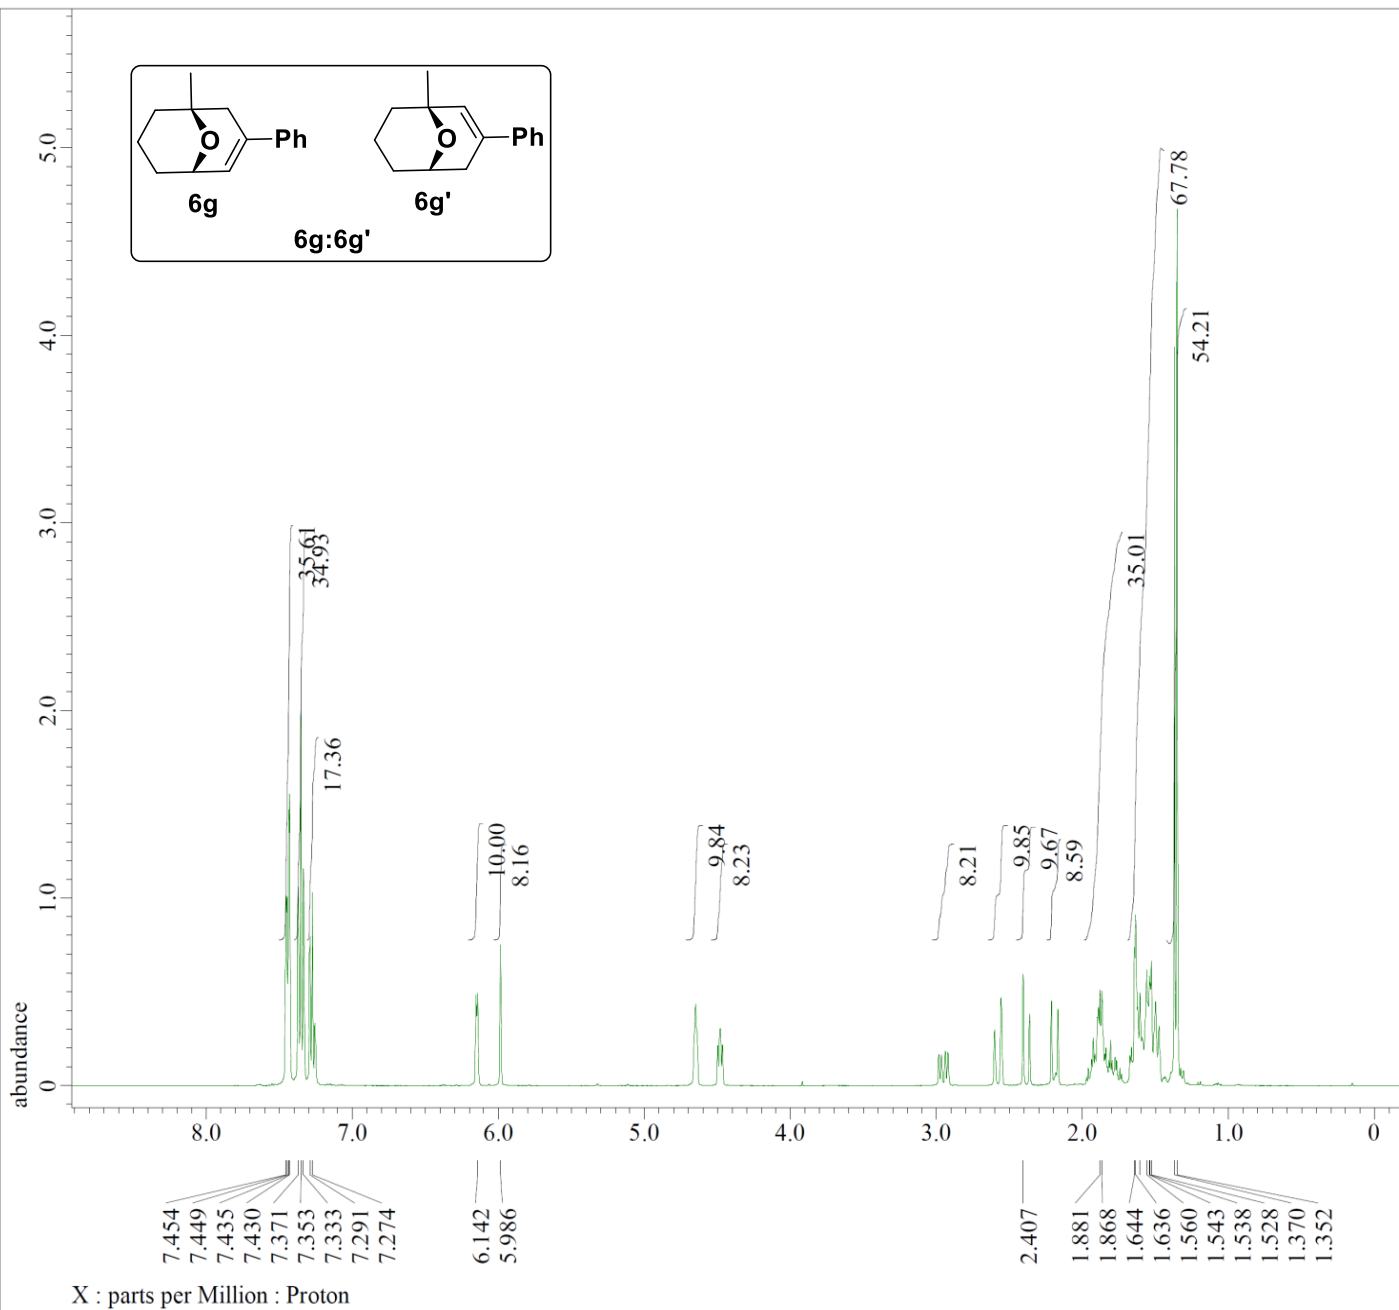

Filename = 104-106-106A\_Carbon-1-3.jd  
 Author = delta  
 Experiment = carbon.jxp  
 Sample Id = 104-106-106A  
 Solvent = CHLOROFORM-D  
 Creation\_Time = 1-JUN-2015 14:25:15  
 Revision\_Time = 1-JUN-2015 14:30:13  
 Current\_Time = 1-JUN-2015 14:31:08

Comment = single pulse decoupled gat  
 Data Format = 1D COMPLEX  
 Dim Size = 26214  
 Dim Title = Carbon13  
 Dim Units = [ppm]  
 Dimensions = X  
 Site = JNM-ECS400  
 Spectrometer = DELTA2\_NMR

Field Strength = 9.389766[T] (400[MHz])  
 X Acq\_Duration = 1.04333312[s]  
 X\_Domain = 13C  
 X\_Freq = 100.52530333[MHz]  
 X\_Offset = 100[ppm]  
 X\_Points = 32768  
 X\_Prescans = 4  
 X\_Resolution = 0.95846665[Hz]  
 X\_Sweep = 31.40703518[kHz]  
 X\_Sweep\_Clippped = 25.12562814[kHz]  
 Irr\_Domain = Proton  
 Irr\_Freq = 399.78219838[MHz]  
 Irr\_Offset = 5[ppm]  
 Clipped = FALSE  
 Scans = 177  
 Total\_Scans = 177

Relaxation\_Delay = 2[s]  
 Recvr\_Gain = 58  
 Temp\_Get = 22.7[dC]  
 X\_90\_Width = 9.56[us]  
 X\_Acq\_Time = 1.04333312[s]  
 X\_Angle = 30[deg]  
 X\_Atn = 5.3[dB]  
 X\_Pulse = 3.18666667[us]  
 Irr\_Atn\_Dec = 22.008[dB]  
 Irr\_Atn\_Noie = 22.008[dB]  
 Irr\_Noise = WALTZ  
 Irr\_Pwidth = 0.115[ms]  
 Decoupling = TRUE  
 Initial\_Wait = 1[s]  
 Noe = TRUE  
 Noe\_Time = 2[s]  
 Repetition\_Time = 3.04333312[s]

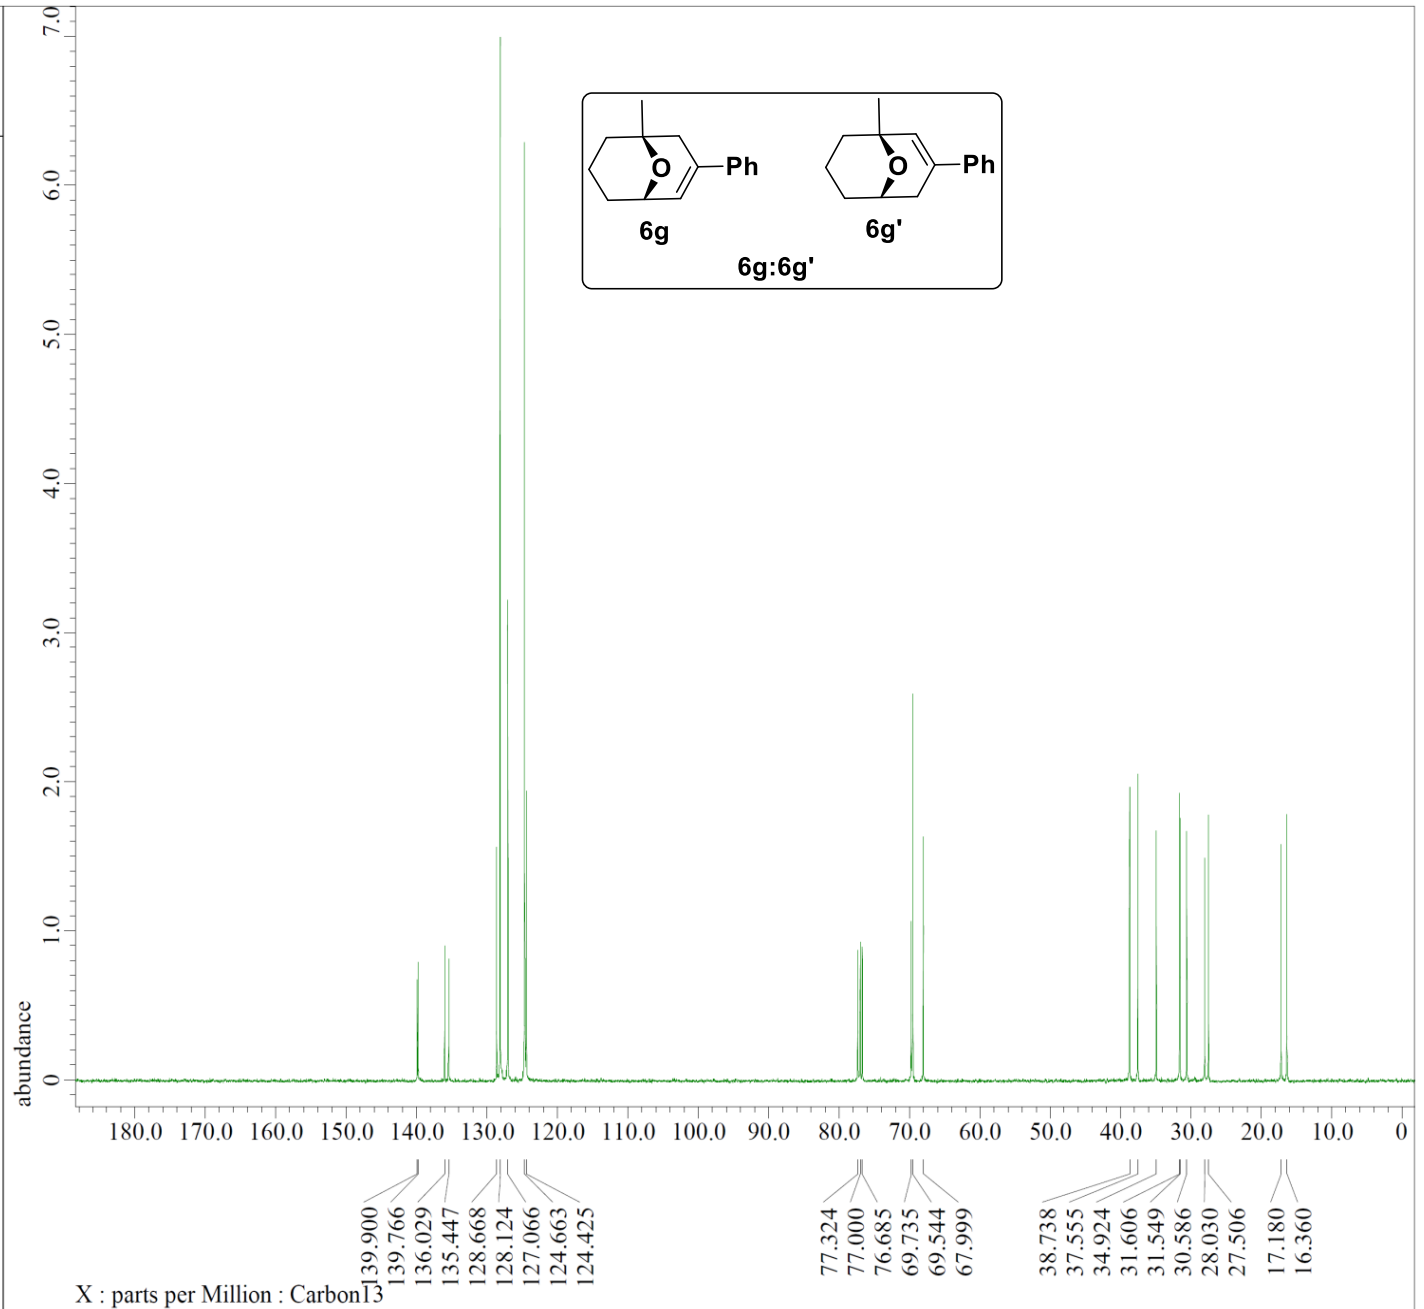

Filename = 104-106-106A\_DEPT135deg-1  
 Author = delta  
 Experiment = dept.jxp  
 Sample\_Id = 104-106-106A  
 Solvent = CHLOROFORM-D  
 Creation\_Time = 1-JUN-2015 14:36:31  
 Revision\_Time = 1-JUN-2015 14:40:29  
 Current\_Time = 1-JUN-2015 14:40:50

Comment = DEPT with decoupling  
 Data\_Format = 1D COMPLEX  
 Dim\_Size = 26214  
 Dim\_Title = Carbon13  
 Dim\_Units = [ppm]  
 Dimensions = X  
 Site = JNM-ECS400  
 Spectrometer = DELTA2\_NMR

Field\_Strength = 9.389766[T] (400[MHz])  
 X\_Acq\_Duration = 1.04333312[s]  
 X\_Domain = 13C  
 X\_Freq = 100.52530333[MHz]  
 X\_Offset = 100[ppm]  
 X\_Points = 32768  
 X\_Prescans = 4  
 X\_Resolution = 0.95846665[Hz]  
 X\_Sweep = 31.40703518[kHz]  
 X\_Sweep\_Clippped = 25.12562814[kHz]  
 Irr\_Domain = Proton  
 Irr\_Freq = 399.78219838[MHz]  
 Irr\_Offset = 5[ppm]  
 Clipped = FALSE  
 Scans = 143  
 Total\_Scans = 143

Relaxation\_Delay = 2[s]  
 Recvr\_Gain = 56  
 Temp\_Get = 22.5[dC]  
 X\_Acq\_Time = 1.04333312[s]  
 X\_Atn = 5.3[dB]  
 X\_Pulse = 9.56[us]  
 Irr\_Atn = 2.4[dB]  
 Irr\_Atn\_Dec = 22.008[dB]  
 Irr\_Noise = WALTZ  
 Irr\_Pulse = 12.031[us]  
 Irr\_Pwidth = 0.115[ms]  
 Base\_Line\_Correct = TRUE  
 Decoupling = TRUE  
 Initial\_Wait = 1[s]  
 J\_Constant = 140[Hz]  
 Selection\_Angle = 135[deg]  
 Selection\_Factor = 1  
 Selection\_Pulse = 18.0465[us]

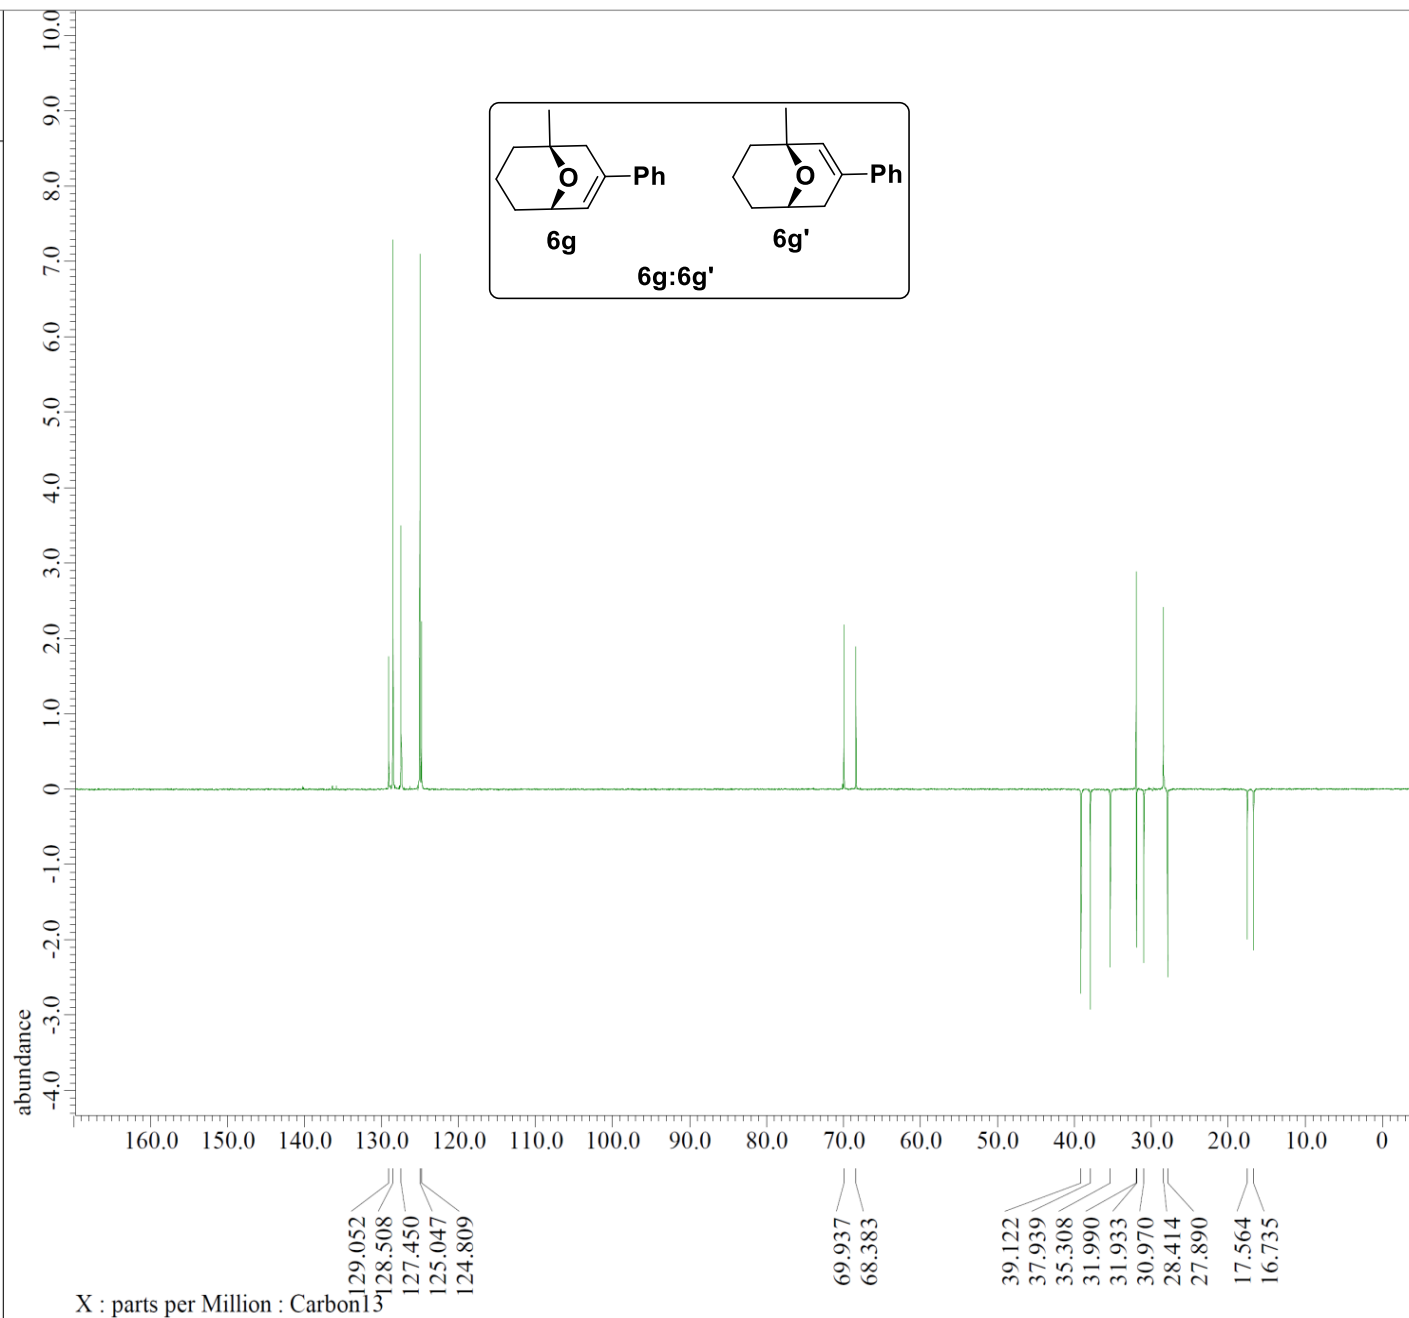

Filename = 104-96-96A\_Proton-2-3.jdf  
 Author = delta  
 Experiment = proton.jxp  
 Sample\_Id = 104-96-96A  
 Solvent = CHLOROFORM-D  
 Creation\_Time = 25-MAY-2015 17:03:10  
 Revision\_Time = 25-MAY-2015 18:18:57  
 Current\_Time = 25-MAY-2015 18:19:21

Comment = single\_pulse  
 Data\_Format = 1D\_COMPLEX  
 Dim\_Size = 13107  
 Dim\_Title = Proton  
 Dim\_Units = [ppm]  
 Dimensions = X  
 Site = JNM-ECS400  
 Spectrometer = DELTA2\_NMR

Field\_Strength = 9.389766[T] (400[MHz])  
 X\_Acq\_Duration = 2.18365952[s]  
 X\_Domain = 1H  
 X\_Freq = 399.78219838[MHz]  
 X\_Offset = 5[ppm]  
 X\_Points = 16384  
 X\_Prescans = 1  
 X\_Resolution = 0.45794685[Hz]  
 X\_Sweep = 7.5030012[kHz]  
 X\_Sweep\_Clippped = 6.00240096[kHz]  
 Irr\_Domain = Proton  
 Irr\_Freq = 399.78219838[MHz]  
 Irr\_Offset = 5[ppm]  
 Tri\_Domain = Proton  
 Tri\_Freq = 399.78219838[MHz]  
 Tri\_Offset = 5[ppm]  
 Clipped = FALSE  
 Scans = 8  
 Total\_Scans = 8

Relaxation\_Delay = 5[s]  
 Recvr\_Gain = 26  
 Temp\_Get = 21.8[dC]  
 X\_90\_Width = 12.031[us]  
 X\_Acq\_Time = 2.18365952[s]  
 X\_Angle = 45[deg]  
 X\_Atn = 2.4[dB]  
 X\_Pulse = 6.0155[us]  
 Irr\_Mode = Off  
 Tri\_Mode = Off  
 Dante\_Presat = FALSE  
 Initial\_Wait = 1[s]  
 Repetition\_Time = 7.18365952[s]

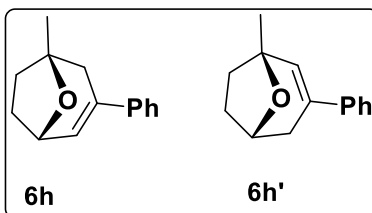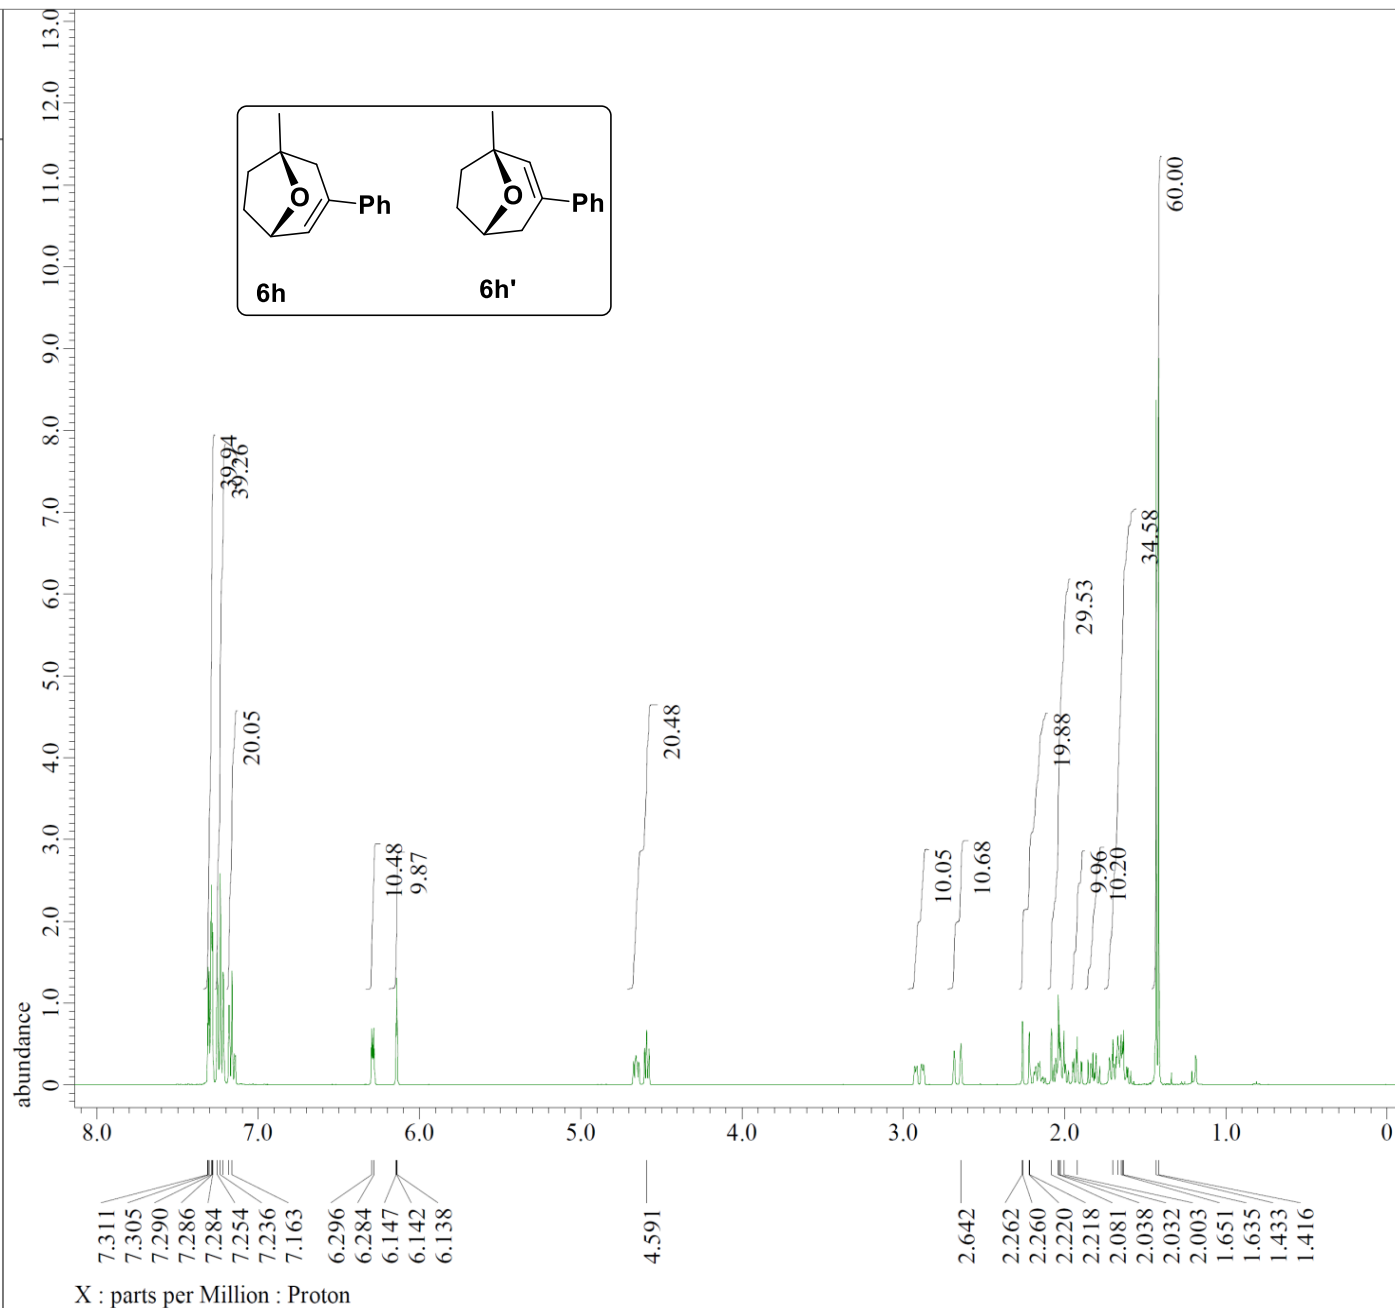

Filename = 104-96-96A\_Carbon-2-3.jdf  
 Author = delta  
 Experiment = carbon.jxp  
 Sample\_Id = 104-96-96A  
 Solvent = CHLOROFORM-D  
 Creation\_Time = 25-MAY-2015 17:06:19  
 Revision\_Time = 25-MAY-2015 18:23:13  
 Current\_Time = 25-MAY-2015 18:23:47

Comment = single pulse decoupled gat  
 Data\_Format = 1D\_COMPLEX  
 Dim\_Size = 26214  
 Dim\_Title = Carbon13  
 Dim\_Units = [ppm]  
 Dimensions = X  
 Site = JNM-ECS400  
 Spectrometer = DELTA2\_NMR

Field\_Strength = 9.389766[T] (400[MHz])  
 X\_Acq\_Duration = 1.04333312[s]  
 X\_Domain = 13C  
 X\_Freq = 100.52530333[MHz]  
 X\_Offset = 100[ppm]  
 X\_Points = 32768  
 X\_Prescans = 4  
 X\_Resolution = 0.95846665[Hz]  
 X\_Sweep = 31.40703518[kHz]  
 X\_Sweep\_Clippped = 25.12562814[kHz]  
 Irr\_Domain = Proton  
 Irr\_Freq = 399.78219838[MHz]  
 Irr\_Offset = 5[ppm]  
 Clipped = FALSE  
 Scans = 1024  
 Total\_Scans = 1024

Relaxation\_Delay = 2[s]  
 Recvr\_Gain = 60  
 Temp\_Get = 22[dC]  
 X\_90\_Width = 9.56[us]  
 X\_Acq\_Time = 1.04333312[s]  
 X\_Angle = 30[deg]  
 X\_Atn = 5.3[dB]  
 X\_Pulse = 3.18666667[us]  
 Irr\_Atn\_Dec = 22.008[dB]  
 Irr\_Atn\_NoE = 22.008[dB]  
 Irr\_Noise = WALTZ  
 Irr\_Pwidth = 0.115[ms]  
 Decoupling = TRUE  
 Initial\_Wait = 1[s]  
 Noe = TRUE  
 Noe\_Time = 2[s]  
 Repetition\_Time = 3.04333312[s]

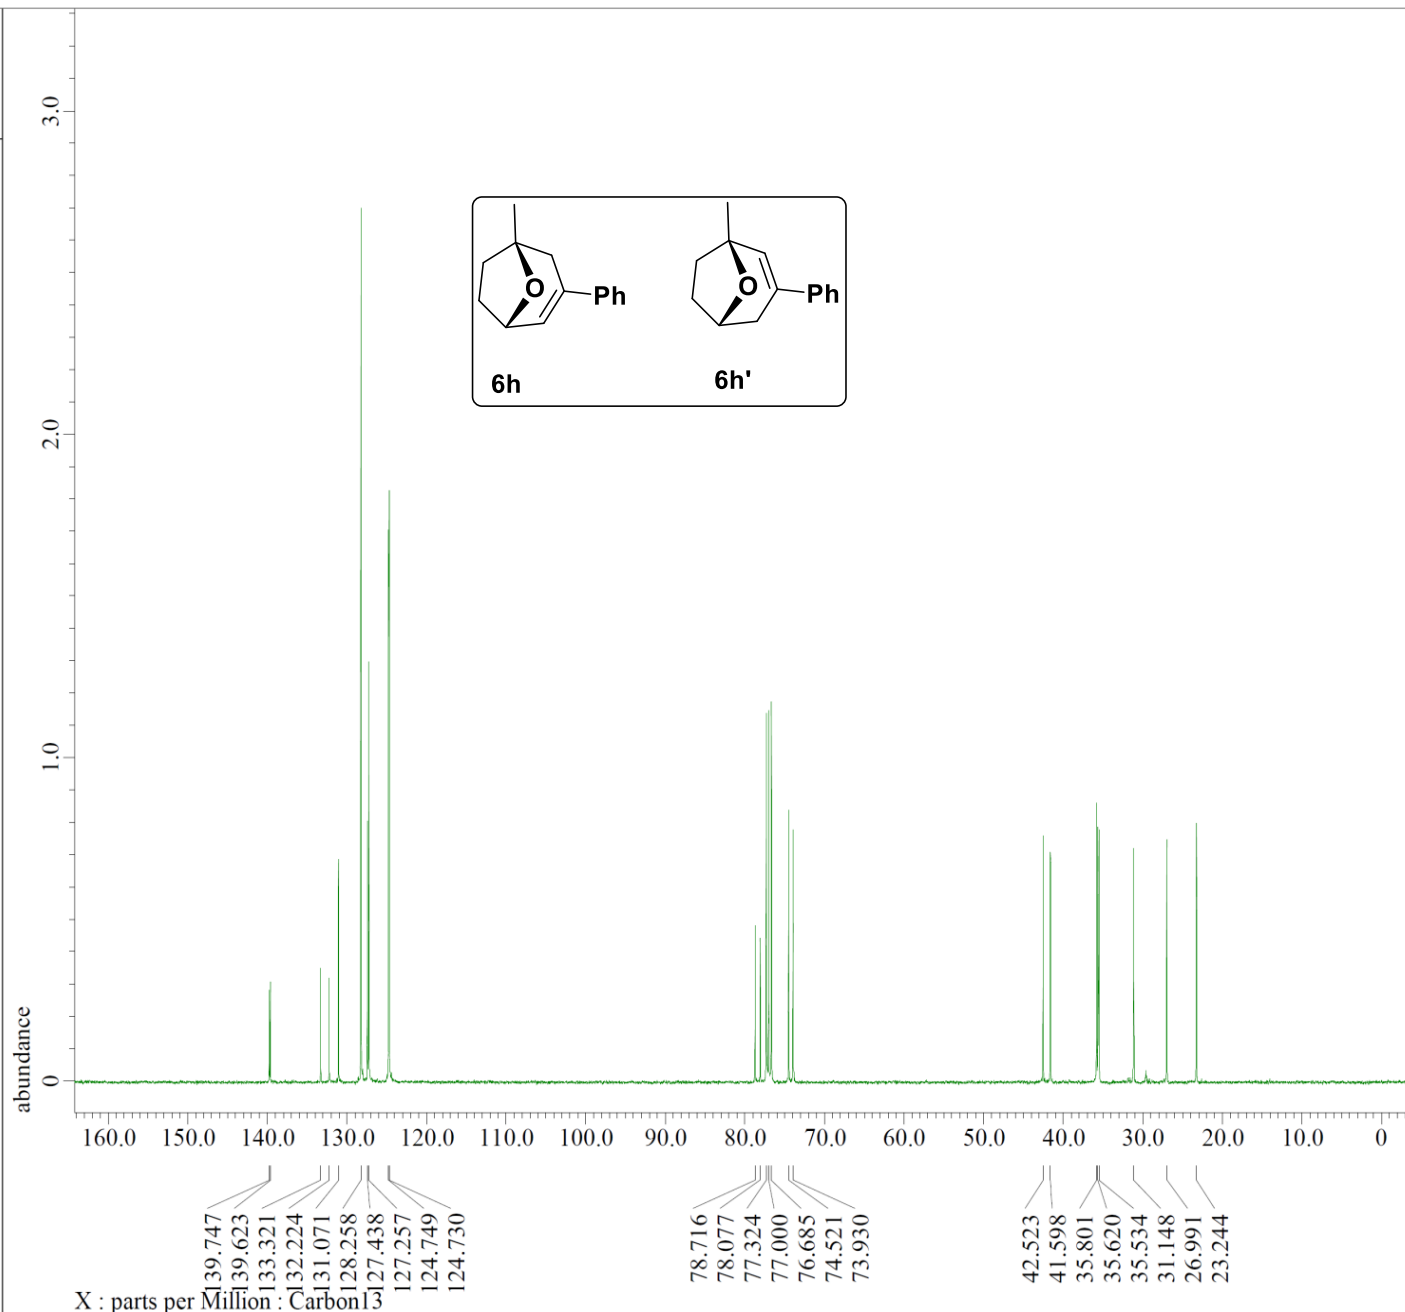

Filename = 104-96-96A\_DEPT135deg-2-3  
 Author = delta  
 Experiment = dept.jxp  
 Sample\_Id = 104-96-96A  
 Solvent = CHLOROFORM-D  
 Creation\_Time = 25-MAY-2015 18:00:25  
 Revision\_Time = 25-MAY-2015 18:24:35  
 Current\_Time = 25-MAY-2015 18:24:53

Comment = DEPT with decoupling  
 Data\_Format = 1D COMPLEX  
 Dim\_Size = 26214  
 Dim\_Title = Carbon13  
 Dim\_Units = [ppm]  
 Dimensions = X  
 Site = JNM-ECS400  
 Spectrometer = DELTA2\_NMR

Field\_Strength = 9.389766[T] (400[MHz])  
 X\_Acq\_Duration = 1.04333312[s]  
 X\_Domain = 13C  
 X\_Freq = 100.52530333[MHz]  
 X\_Offset = 100[ppm]  
 X\_Points = 32768  
 X\_Prescans = 4  
 X\_Resolution = 0.95846665[Hz]  
 X\_Sweep = 31.40703518[kHz]  
 X\_Sweep\_Clippped = 25.12562814[kHz]  
 Irr\_Domain = Proton  
 Irr\_Freq = 399.78219838[MHz]  
 Irr\_Offset = 5[ppm]  
 Clipped = FALSE  
 Scans = 512  
 Total\_Scans = 512

Relaxation\_Delay = 2[s]  
 Recvr\_Gain = 60  
 Temp\_Get = 21.7[dC]  
 X\_Acq\_Time = 1.04333312[s]  
 X\_Atn = 5.3[dB]  
 X\_Pulse = 9.56[us]  
 Irr\_Atn = 2.4[dB]  
 Irr\_Atn\_Dec = 22.008[dB]  
 Irr\_Noise = WALTZ  
 Irr\_Pulse = 12.031[us]  
 Irr\_Pwidth = 0.115[ms]  
 Base\_Line\_Correct = TRUE  
 Decoupling = TRUE  
 Initial\_Wait = 1[s]  
 J\_Constant = 140[Hz]  
 Selection\_Angle = 135[deg]  
 Selection\_Factor = 1  
 Selection\_Pulse = 18.0465[us]

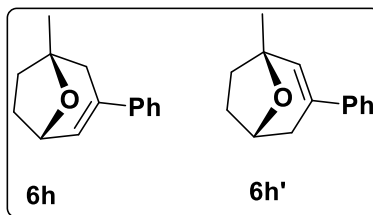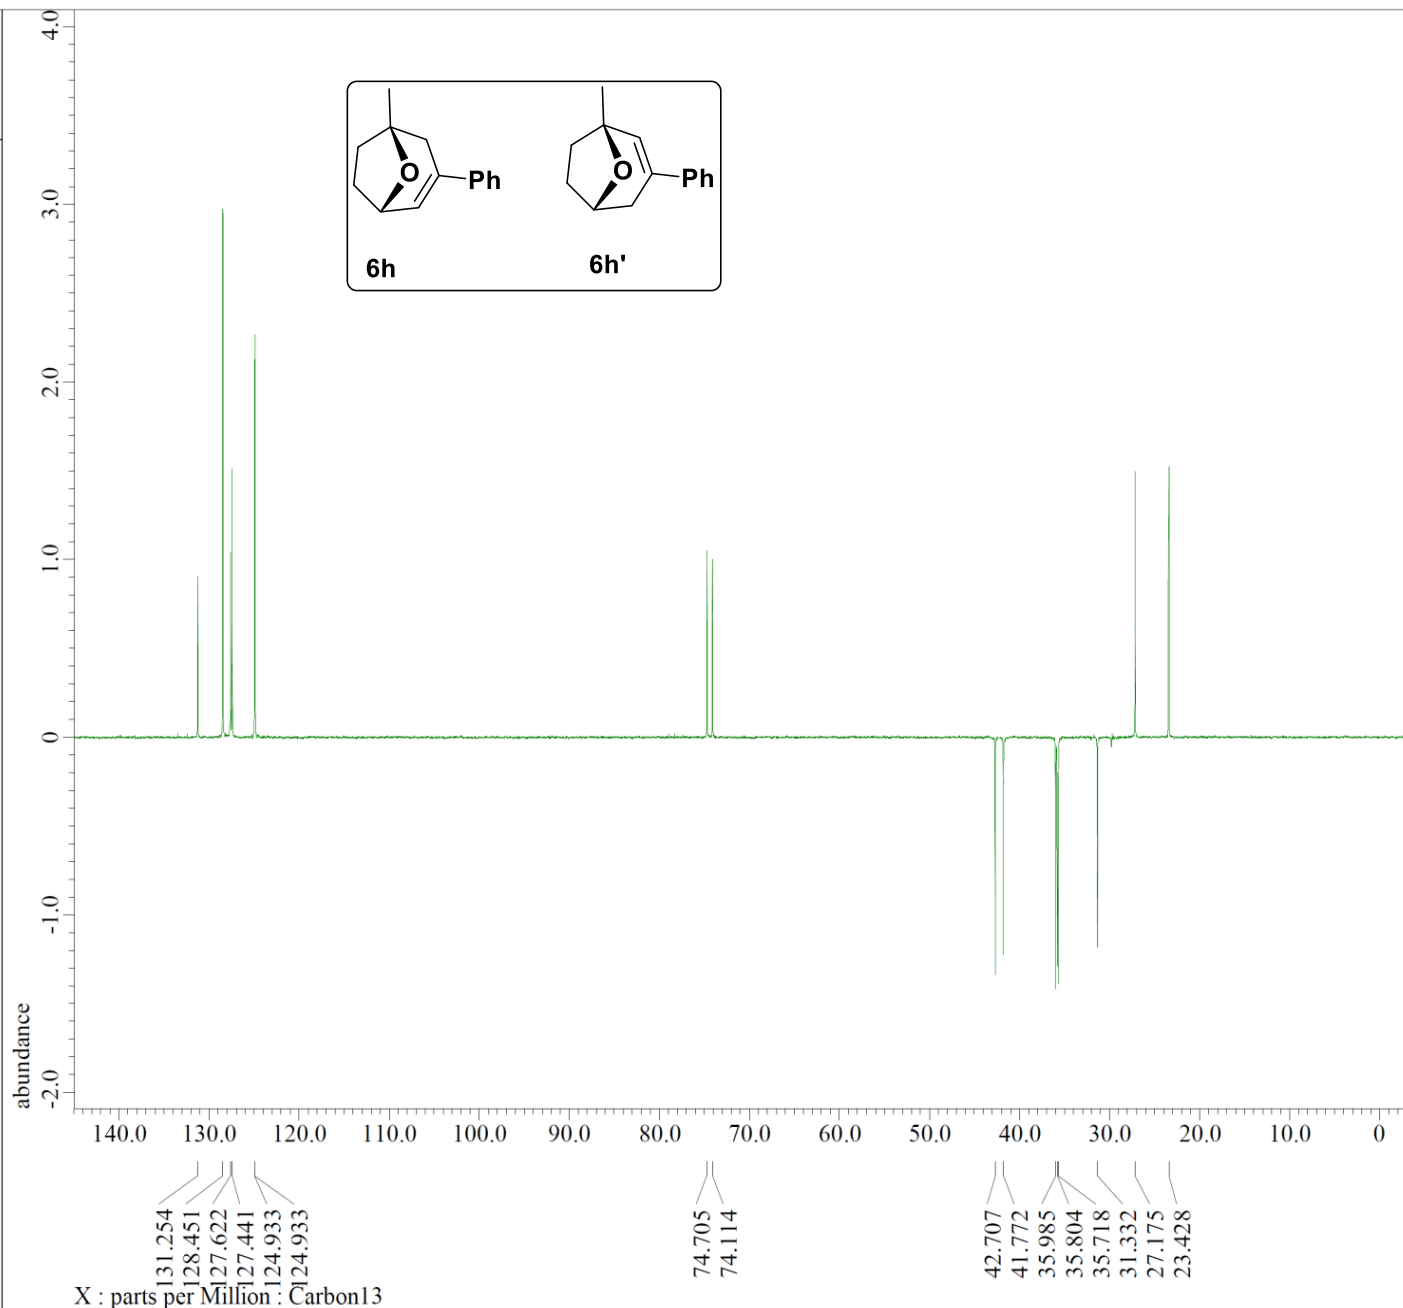



Filename = 104-108-108A\_Proton-1-5.jd  
 Author = delta  
 Experiment = proton.jxp  
 Sample\_Id = 104-108-108A  
 Solvent = CHLOROFORM-D  
 Creation\_Time = 1-JUN-2015 16:15:54  
 Revision\_Time = 1-JUN-2015 16:15:40  
 Current\_Time = 1-JUN-2015 16:16:08

Comment = single\_pulse  
 Data\_Format = 1D\_COMPLEX  
 Dim\_Size = 13107  
 Dim\_Title = Proton  
 Dim\_Units = [ppm]  
 Dimensions = X  
 Site = JNM-ECS400  
 Spectrometer = DELTA2\_NMR

Field\_Strength = 9.389766[T] (400[MHz])  
 X\_Acq\_Duration = 2.18365952[s]  
 X\_Domain = 1H  
 X\_Freq = 399.78219838[MHz]  
 X\_Offset = 5[ppm]  
 X\_Points = 16384  
 X\_Prescans = 1  
 X\_Resolution = 0.45794685[Hz]  
 X\_Sweep = 7.5030012[kHz]  
 X\_Sweep\_Clipped = 6.00240096[kHz]  
 Irr\_Domain = Proton  
 Irr\_Freq = 399.78219838[MHz]  
 Irr\_Offset = 5[ppm]  
 Tri\_Domain = Proton  
 Tri\_Freq = 399.78219838[MHz]  
 Tri\_Offset = 5[ppm]  
 Clipped = FALSE  
 Scans = 8  
 Total\_Scans = 8

Relaxation\_Delay = 5[s]  
 Recvr\_Gain = 32  
 Temp\_Get = 22.5[dC]  
 X\_90\_Width = 12.031[us]  
 X\_Acq\_Time = 2.18365952[s]  
 X\_Angle = 45[deg]  
 X\_Atn = 2.4[dB]  
 X\_Pulse = 6.0155[us]  
 Irr\_Mode = Off  
 Tri\_Mode = Off  
 Dante\_Presat = FALSE  
 Initial\_Wait = 1[s]  
 Repetition\_Time = 7.18365952[s]

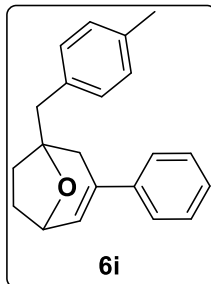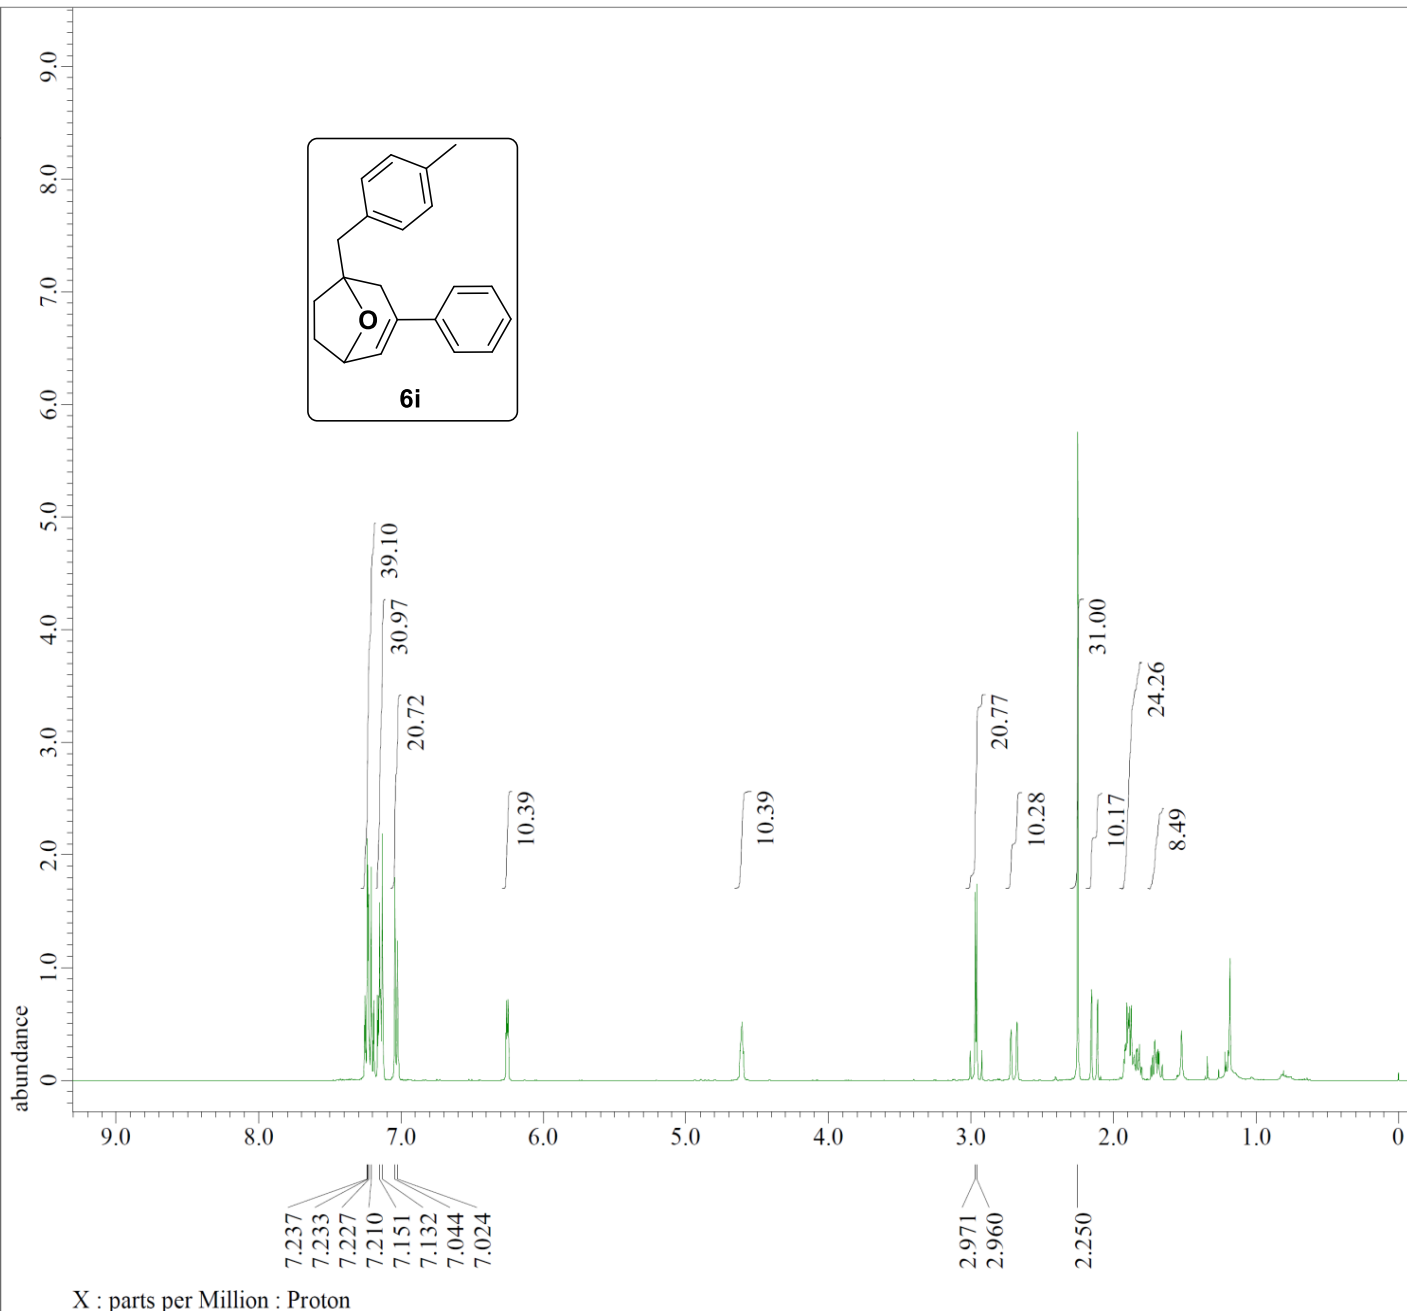

Filename = 104-108-108A\_Carbon-1-4.jd  
 Author = delta  
 Experiment = carbon.jxp  
 Sample\_Id = 104-108-108A  
 Solvent = CHLOROFORM-D  
 Creation\_Time = 1-JUN-2015 16:18:58  
 Revision\_Time = 1-JUN-2015 18:58:24  
 Current\_Time = 1-JUN-2015 18:59:21

Comment = single pulse decoupled gat  
 Data\_Format = 1D COMPLEX  
 Dim\_Size = 26214  
 Dim\_Title = Carbon13  
 Dim\_Units = [ppm]  
 Dimensions = X  
 Site = JNM-ECS400  
 Spectrometer = DELTA2\_NMR

Field\_Strength = 9.389766[T] (400[MHz])  
 X\_Acq\_Duration = 1.04333312[s]  
 X\_Domain = 13C  
 X\_Freq = 100.52530333[MHz]  
 X\_Offset = 100[ppm]  
 X\_Points = 32768  
 X\_Prescans = 4  
 X\_Resolution = 0.95846665[Hz]  
 X\_Sweep = 31.40703518[kHz]  
 X\_Sweep\_Clippped = 25.12562814[kHz]  
 Irr\_Domain = Proton  
 Irr\_Freq = 399.78219838[MHz]  
 Irr\_Offset = 5[ppm]  
 Clipped = FALSE  
 Scans = 1024  
 Total\_Scans = 1024

Relaxation\_Delay = 2[s]  
 Recvr\_Gain = 60  
 Temp\_Get = 22.8[dC]  
 X\_90\_Width = 9.56[us]  
 X\_Acq\_Time = 1.04333312[s]  
 X\_Angle = 30[deg]  
 X\_Atn = 5.3[dB]  
 X\_Pulse = 3.18666667[us]  
 Irr\_Atn\_Dec = 22.008[dB]  
 Irr\_Atn\_Noie = 22.008[dB]  
 Irr\_Noise = WALTZ  
 Irr\_Pwidth = 0.115[ms]  
 Decoupling = TRUE  
 Initial\_Wait = 1[s]  
 Noe = TRUE  
 Noe\_Time = 2[s]  
 Repetition\_Time = 3.04333312[s]

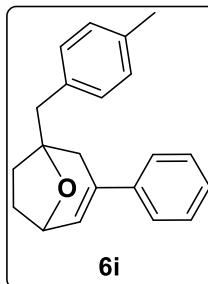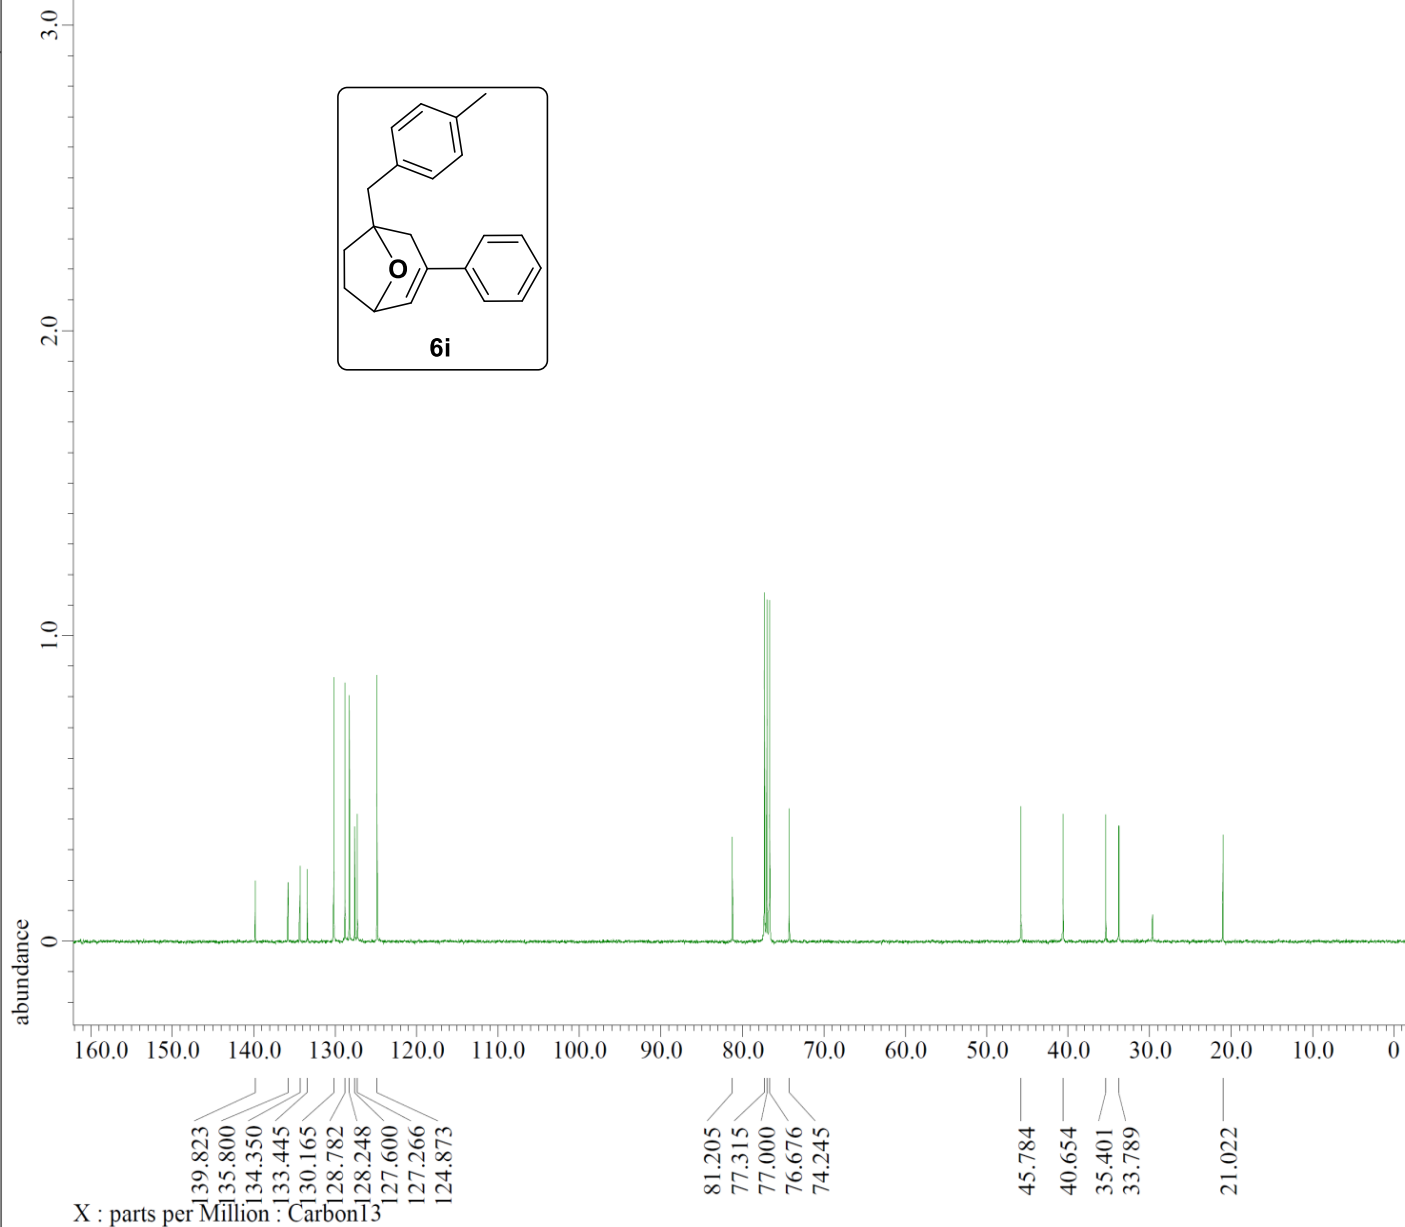

Filename = 104-108-108A\_DEPT135deg-1  
 Author = delta  
 Experiment = dept.jxp  
 Sample\_Id = 104-108-108A  
 Solvent = CHLOROFORM-D  
 Creation\_Time = 1-JUN-2015 17:13:10  
 Revision\_Time = 1-JUN-2015 18:59:54  
 Current\_Time = 1-JUN-2015 19:00:03

Comment = DEPT with decoupling  
 Data\_Format = 1D COMPLEX  
 Dim\_Size = 26214  
 Dim\_Title = Carbon13  
 Dim\_Units = [ppm]  
 Dimensions = X  
 Site = JNM-ECS400  
 Spectrometer = DELTA2\_NMR

Field\_Strength = 9.389766[T] (400[MHz])  
 X\_Acq\_Duration = 1.04333312[s]  
 X\_Domain = 13C  
 X\_Freq = 100.52530333[MHz]  
 X\_Offset = 100[ppm]  
 X\_Points = 32768  
 X\_Prescans = 4  
 X\_Resolution = 0.95846665[Hz]  
 X\_Sweep = 31.40703518[kHz]  
 X\_Sweep\_Clippped = 25.12562814[kHz]  
 Irr\_Domain = Proton  
 Irr\_Freq = 399.78219838[MHz]  
 Irr\_Offset = 5[ppm]  
 Clipped = FALSE  
 Scans = 126  
 Total\_Scans = 126

Relaxation\_Delay = 2[s]  
 Recvr\_Gain = 60  
 Temp\_Get = 22.6[dC]  
 X\_Acq\_Time = 1.04333312[s]  
 X\_Atn = 5.3[dB]  
 X\_Pulse = 9.56[us]  
 Irr\_Atn = 2.4[dB]  
 Irr\_Atn\_Dec = 22.008[dB]  
 Irr\_Noise = WALTZ  
 Irr\_Pulse = 12.031[us]  
 Irr\_Pwidth = 0.115[ms]  
 Base\_Line\_Correct = TRUE  
 Decoupling = TRUE  
 Initial\_Wait = 1[s]  
 J\_Constant = 140[Hz]  
 Selection\_Angle = 135[deg]  
 Selection\_Factor = 1  
 Selection\_Pulse = 18.0465[us]

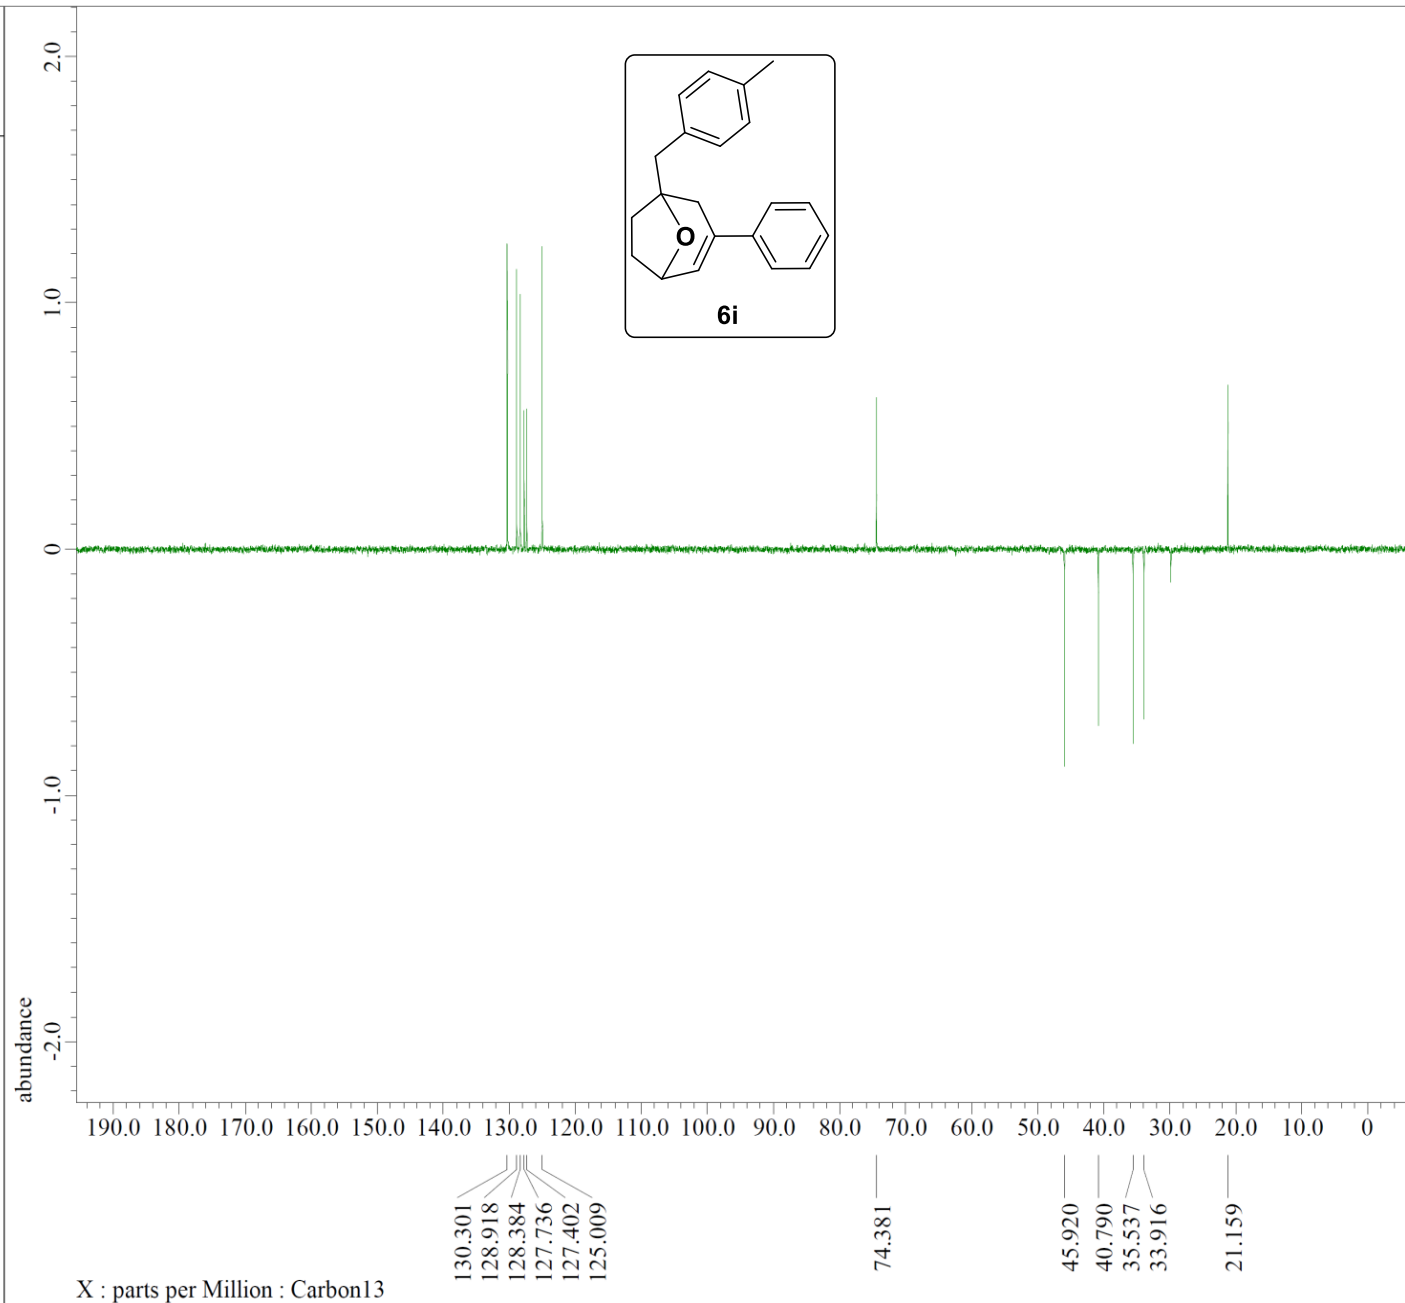

Jaya-20141225-2

Pulse Sequence: s2pul

Mercury-400BB "MercuryPlus400"

Date: Dec 25 2014

Solvent: CDCl<sub>3</sub>

Ambient temperature

Total 32 repetitions

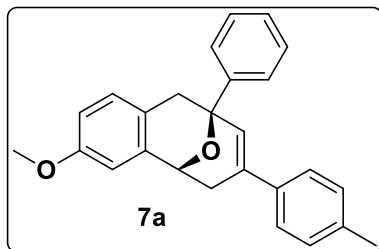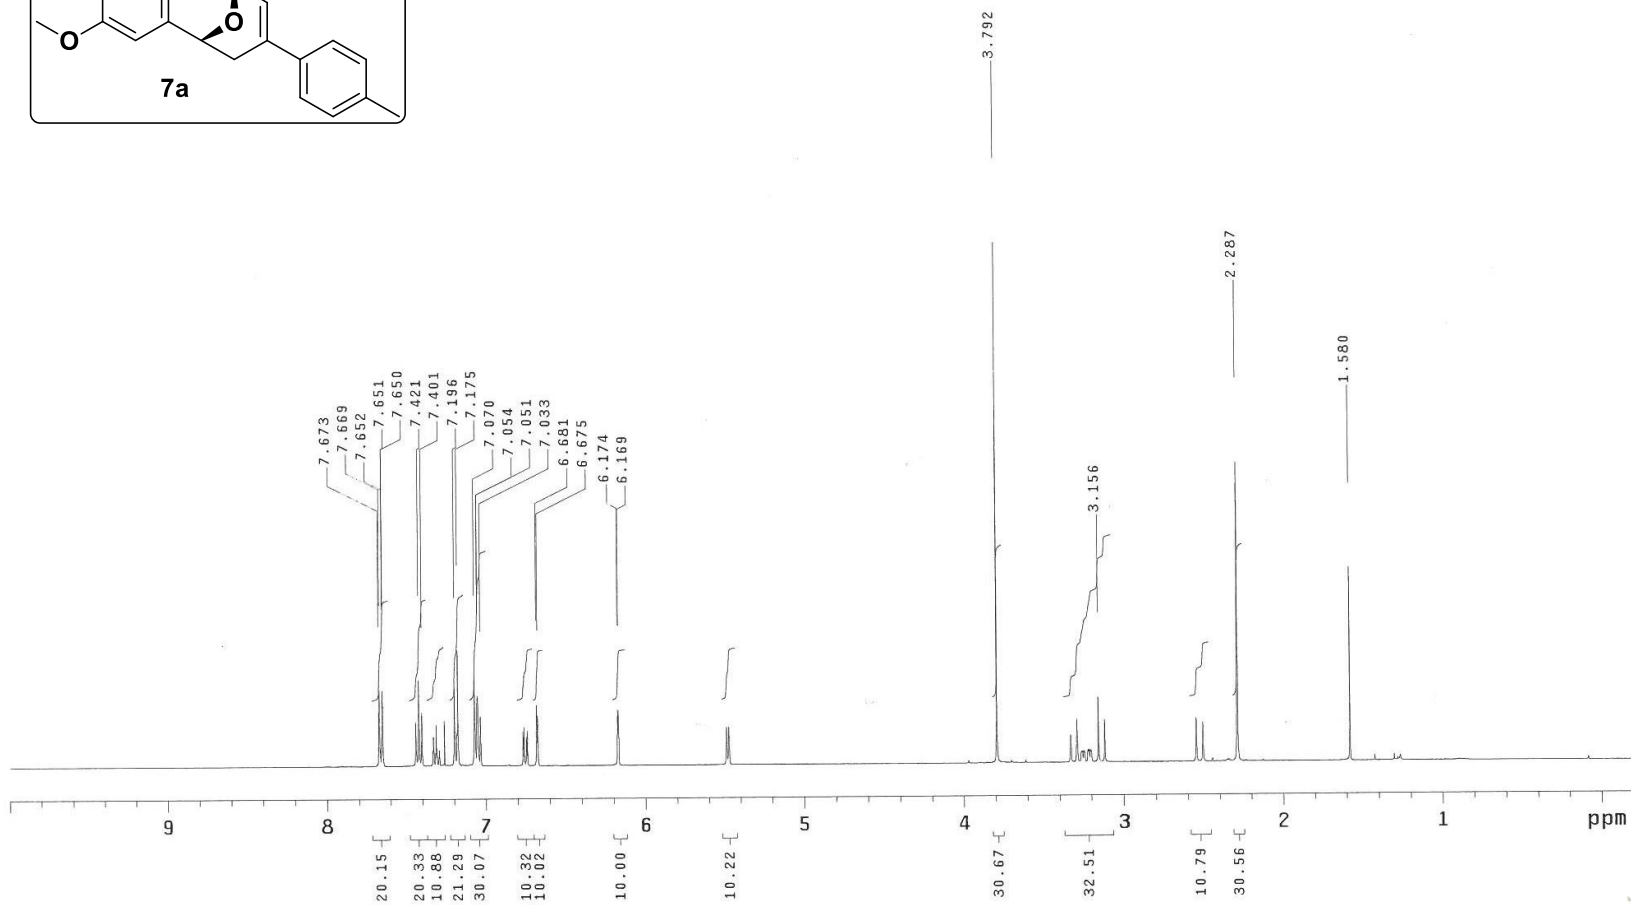

Jaya-20141225-2

Pulse Sequence: s2pu1

Mercury-400BB "MercuryPlus400"

Date: Dec 25 2014

Solvent: CDCl<sub>3</sub>

Ambient temperature

Total 1232 repetitions

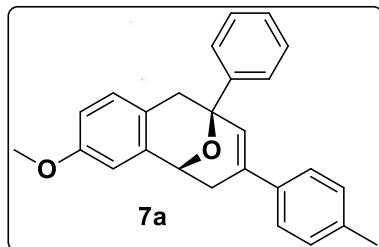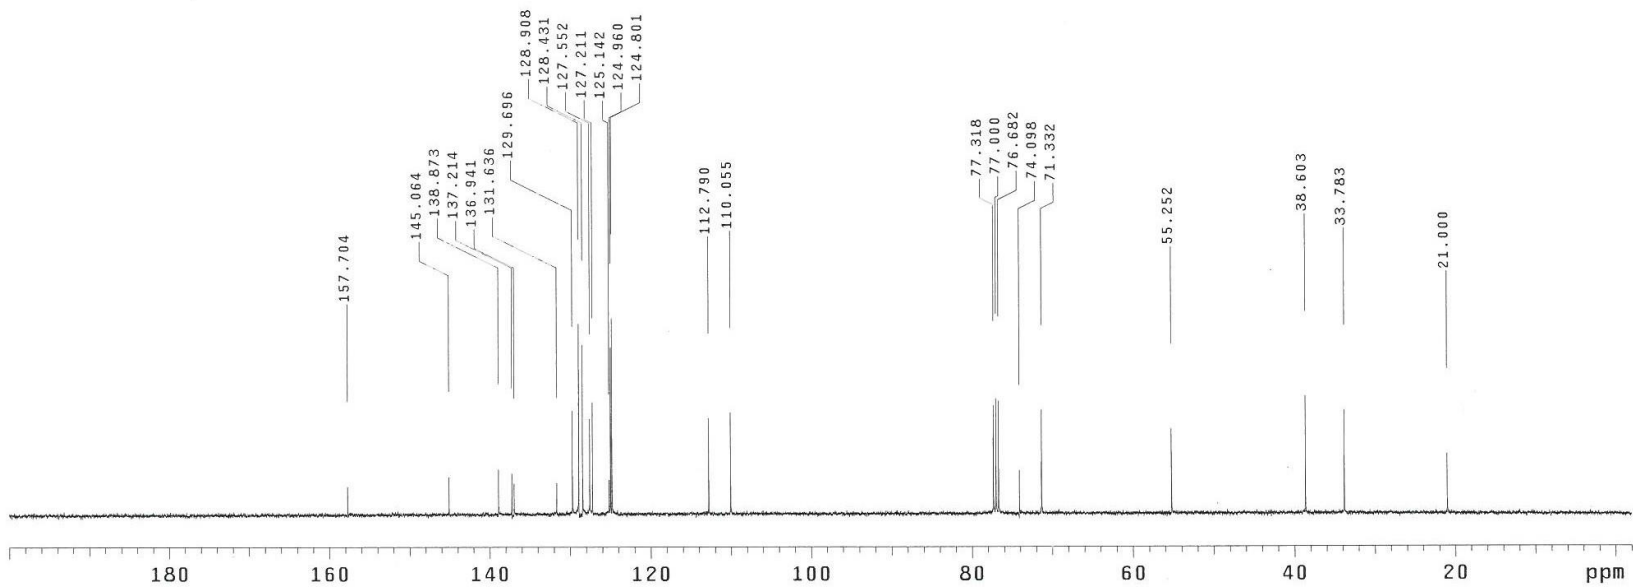

Jaya-20141225-2

Pulse Sequence: DEPT

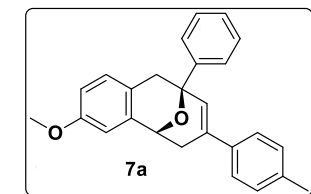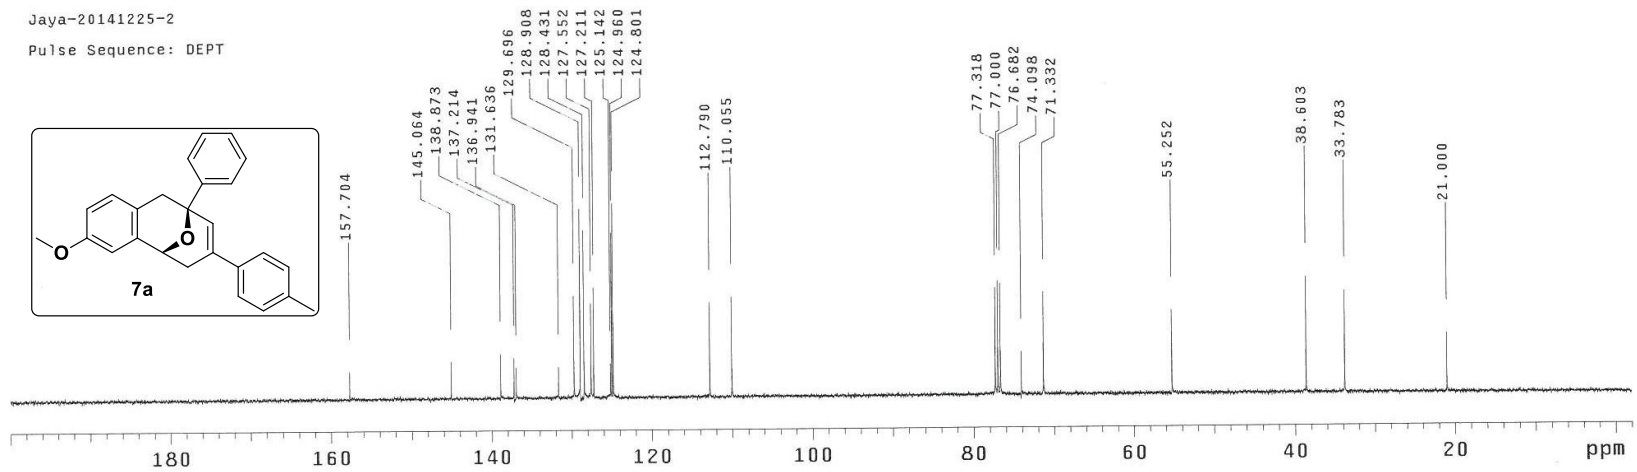

Milu-2014-P020

Pulse Sequence: s2pu1

UNITYplus-400 "unity400"

Date: Apr 7 2014

Solvent: CDCl3

Ambient temperature

Total 80 repetitions

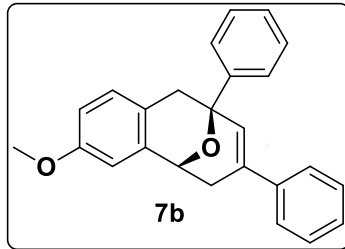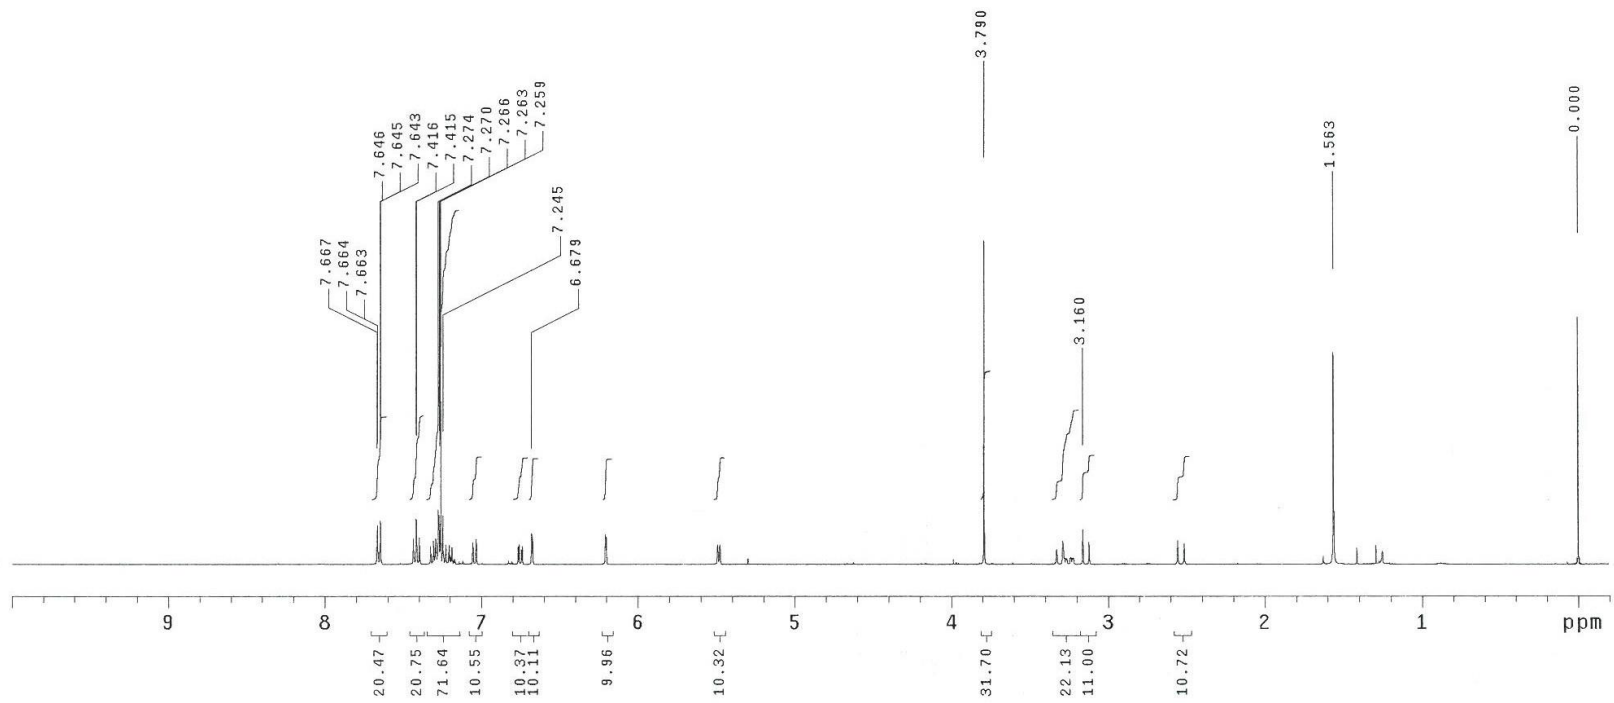

Milu-2014-P020

Pulse Sequence: s2pu1

UNITYplus-400 "unity400"

Date: Apr 7 2014

Solvent: CDCl<sub>3</sub>

Ambient temperature

Total 13280 repetitions

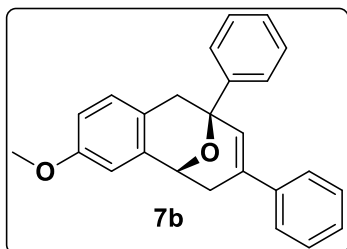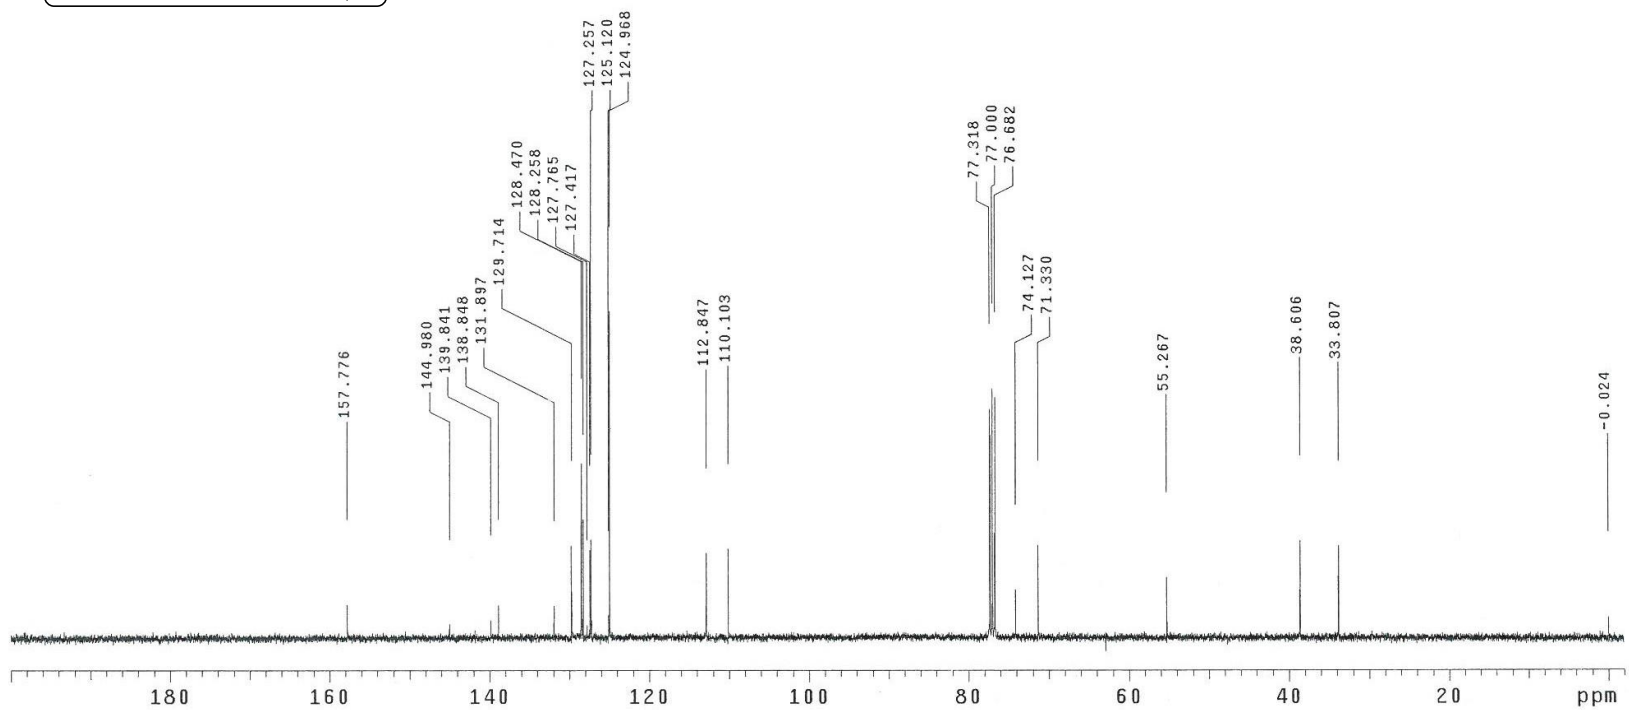



Milu-2014-P020

Pulse Sequence: DEPT

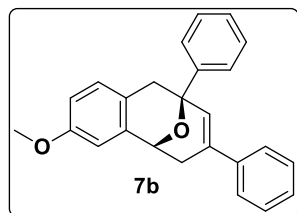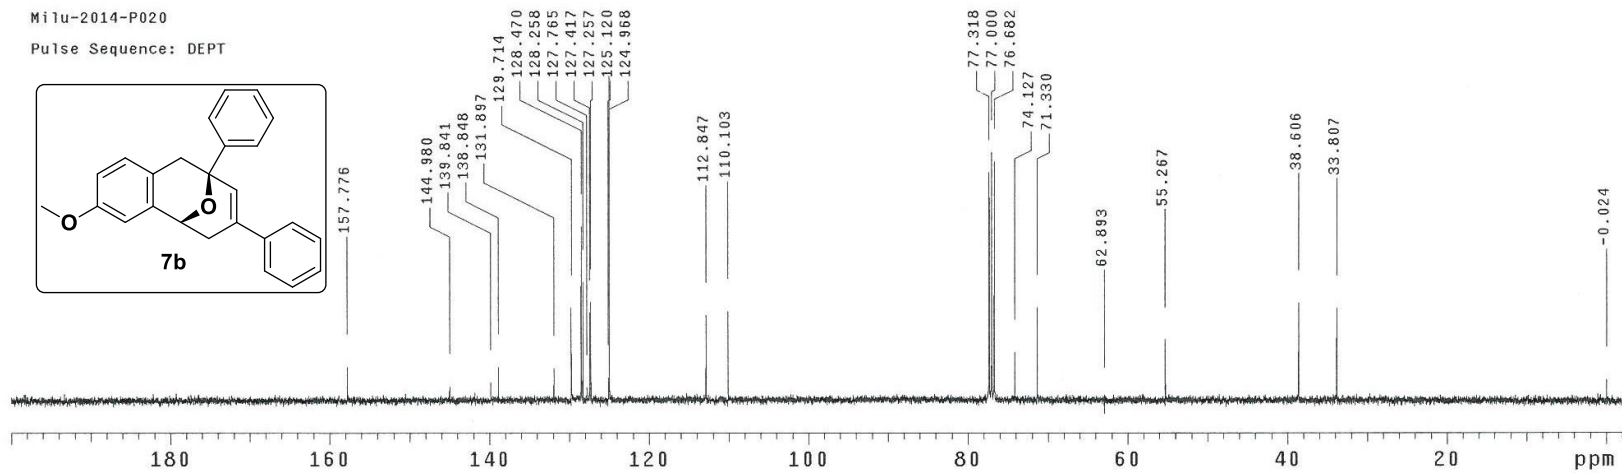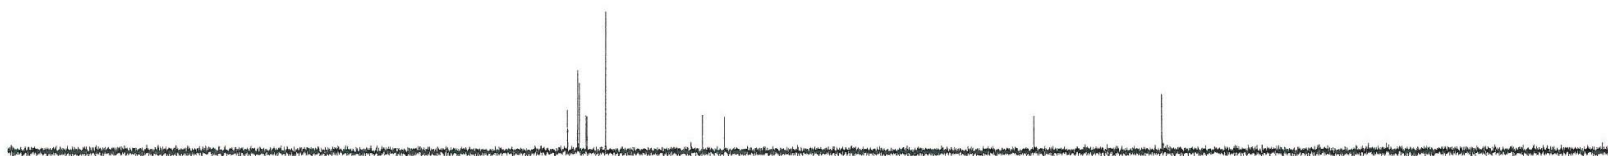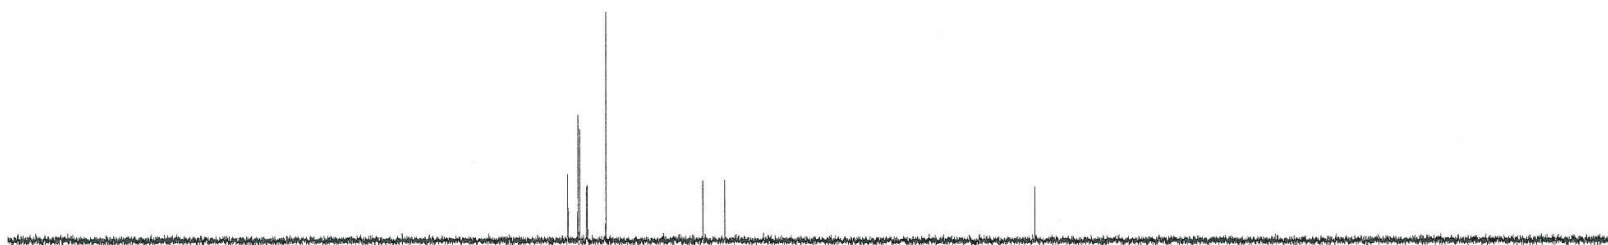

phph0005

Pulse Sequence: s2pu1

Mercury-400BB "MercuryPlus400"

Date: Sep 15 2014

Solvent: CDCl<sub>3</sub>

Ambient temperature

Total 32 repetitions

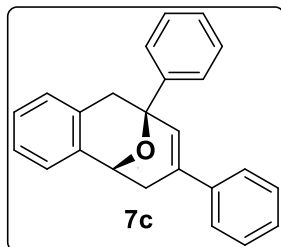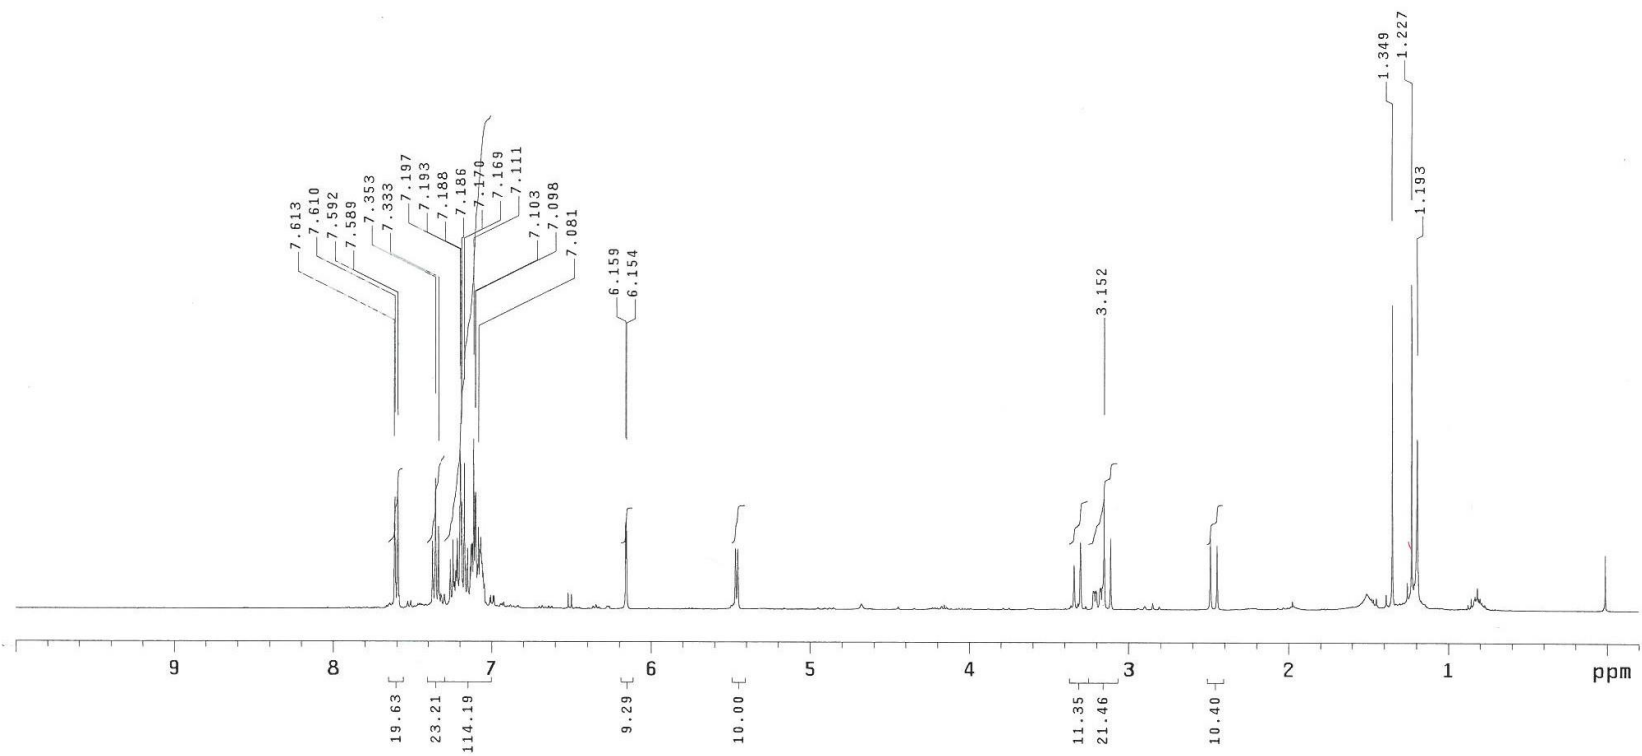

phph0005

Pulse Sequence: s2pu1

Mercury-400BB "MercuryPlus400"

Date: Sep 15 2014

Solvent: CDCl<sub>3</sub>

Ambient temperature

Total 1392 repetitions

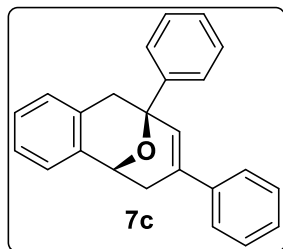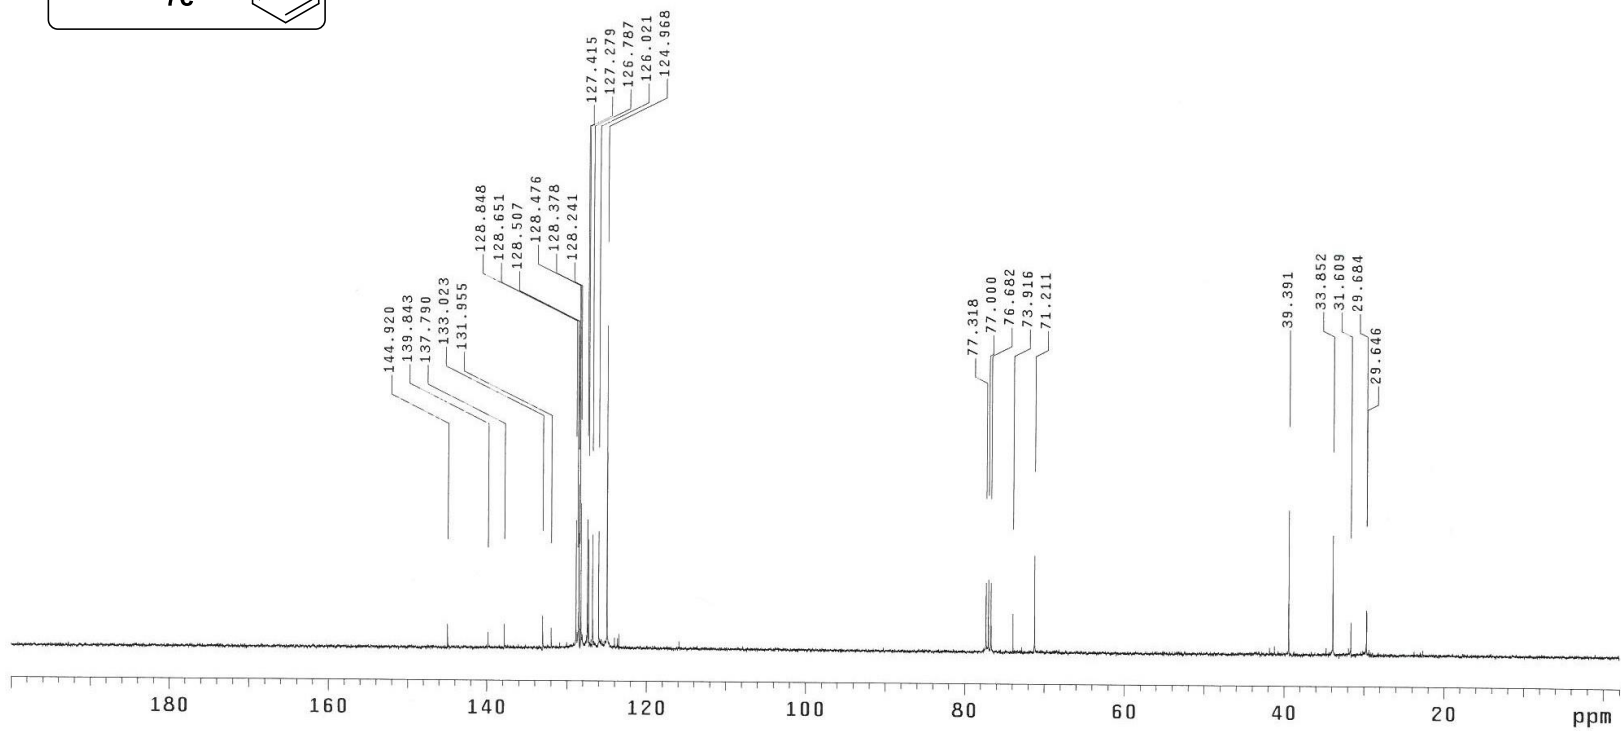

phph0005

Pulse Sequence: DEPT

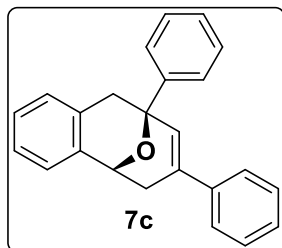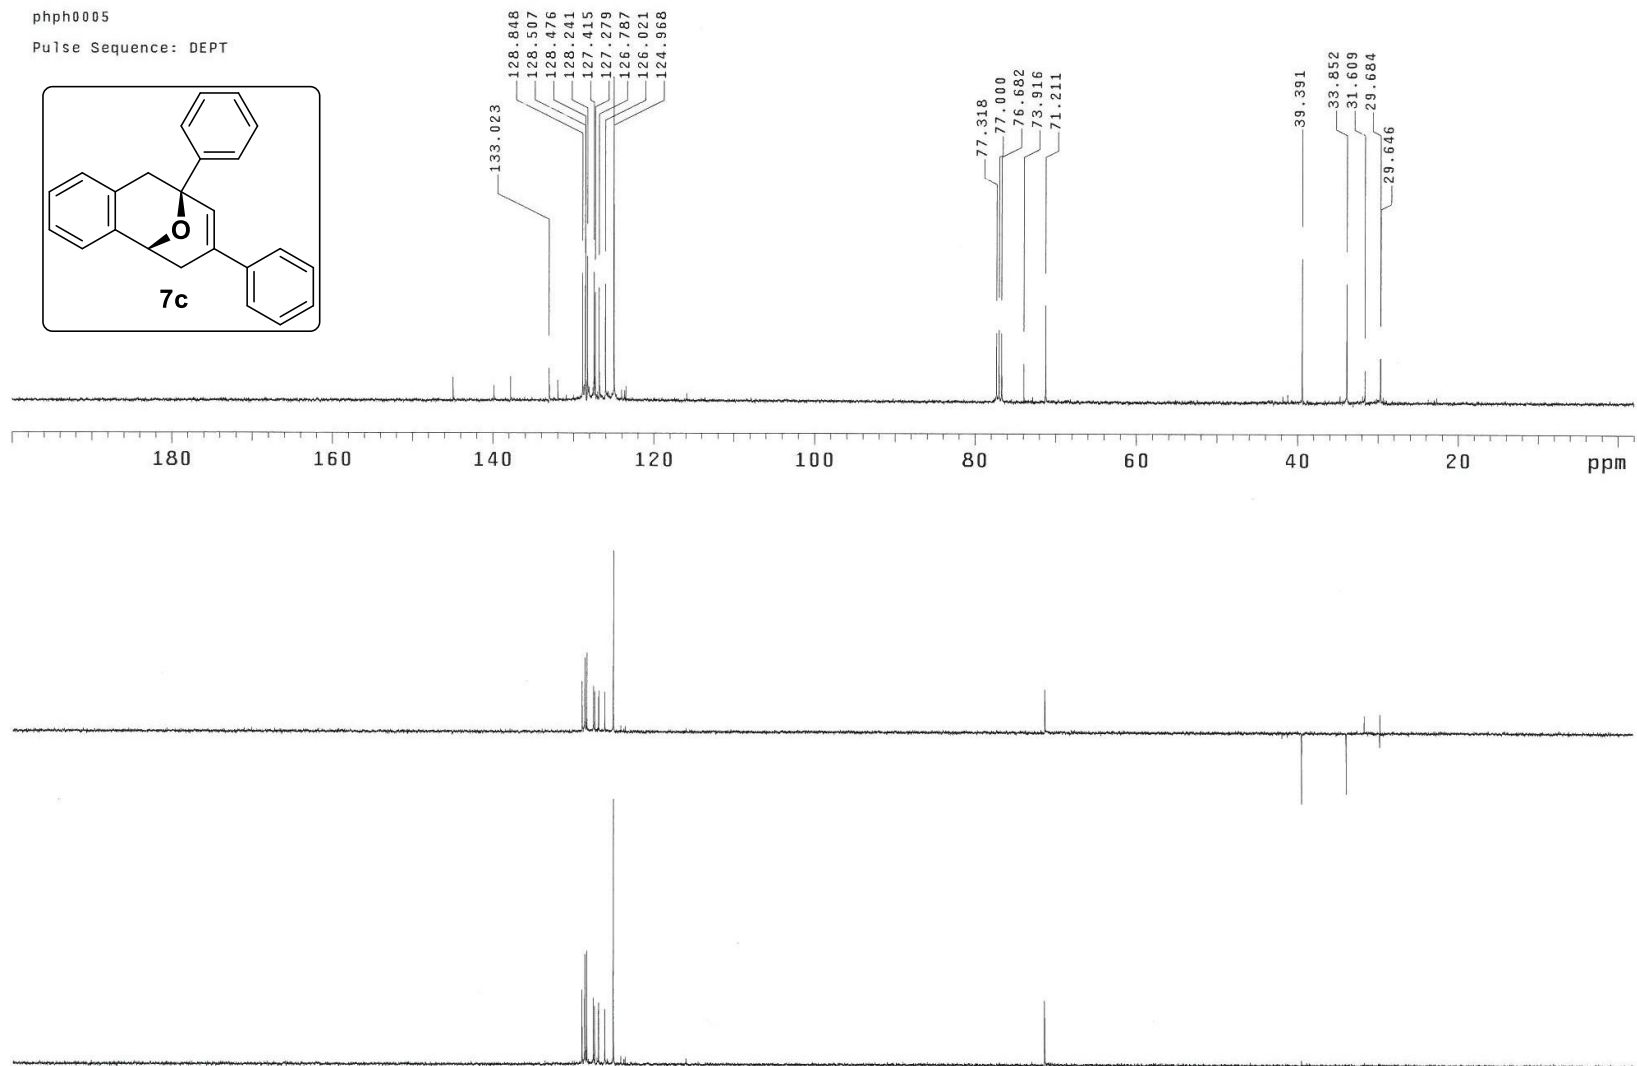

phph0003

Pulse Sequence: s2pu1

Mercury-400BB "MercuryPlus400"

Date: Sep 15 2014

Solvent: CDCl<sub>3</sub>

Ambient temperature

Total 32 repetitions

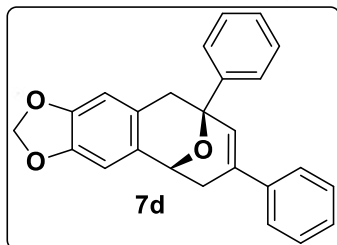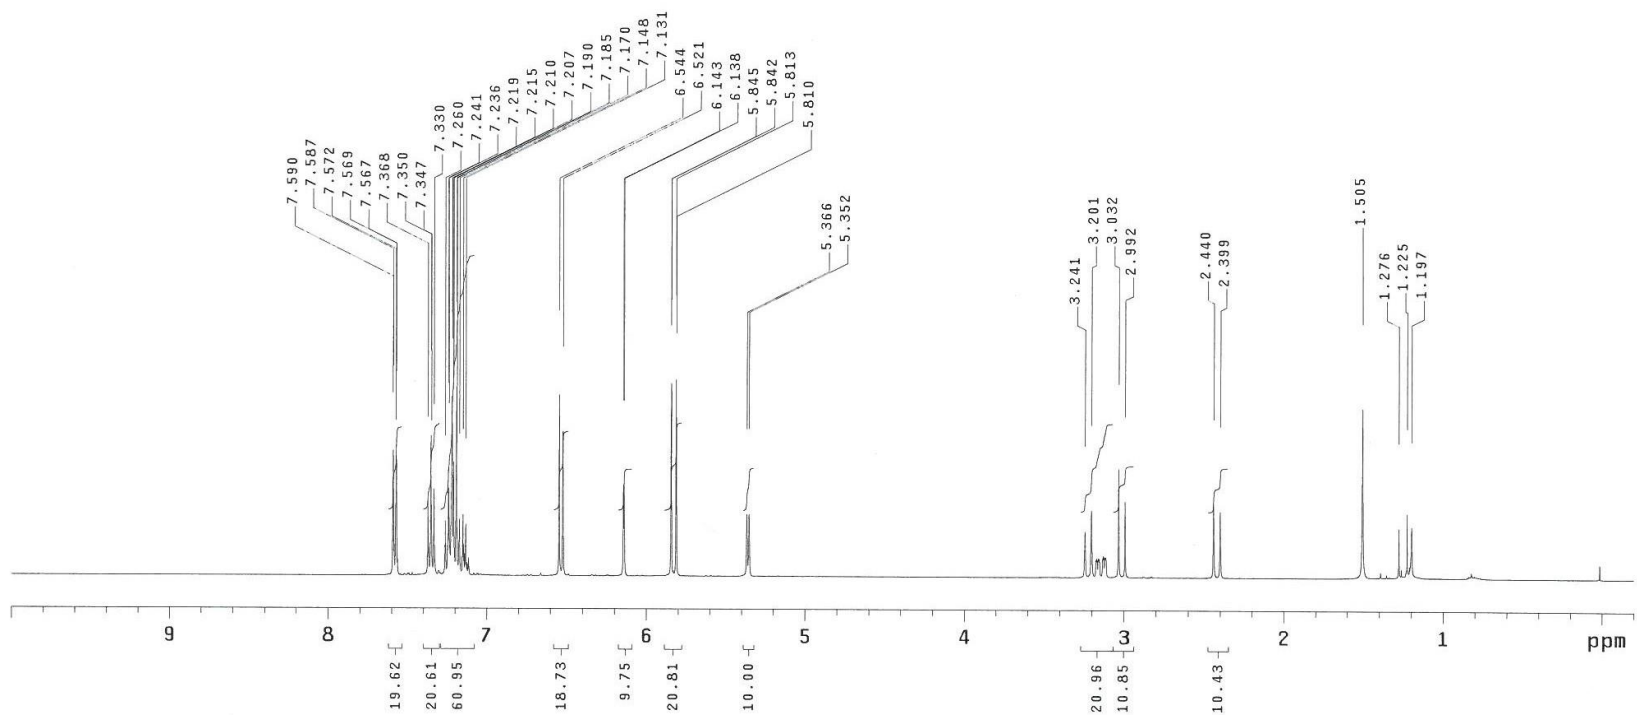

phph0003

Pulse Sequence: s2pu1

Mercury-400BB "MercuryPlus400"

Date: Sep 15 2014

Solvent: CDCl<sub>3</sub>

Ambient temperature

Total 1120 repetitions

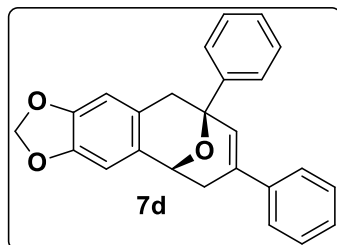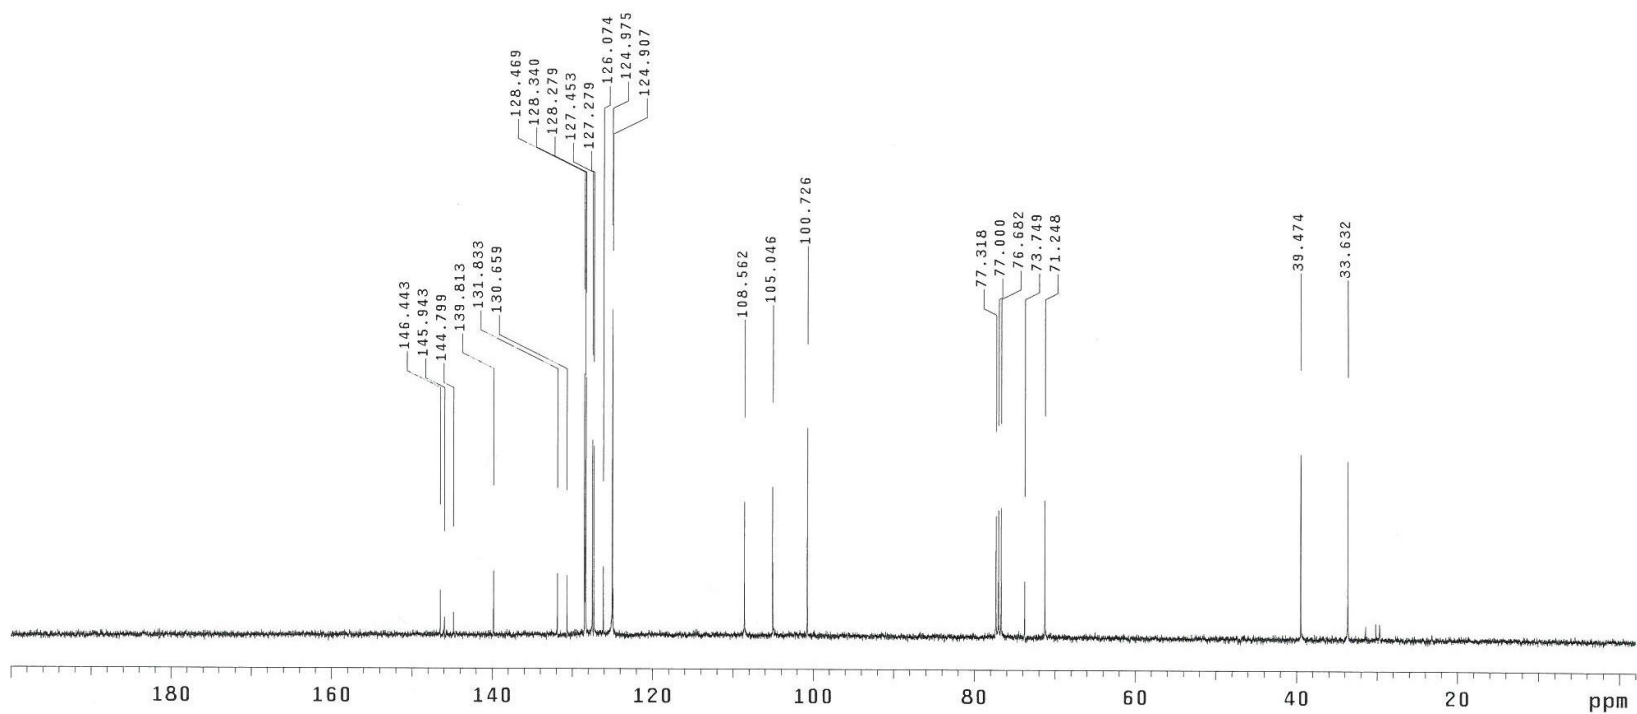

phph0003

Pulse Sequence: DEPT

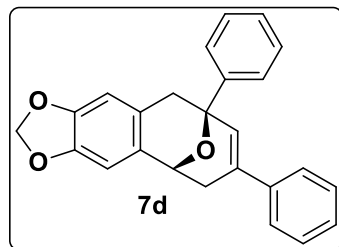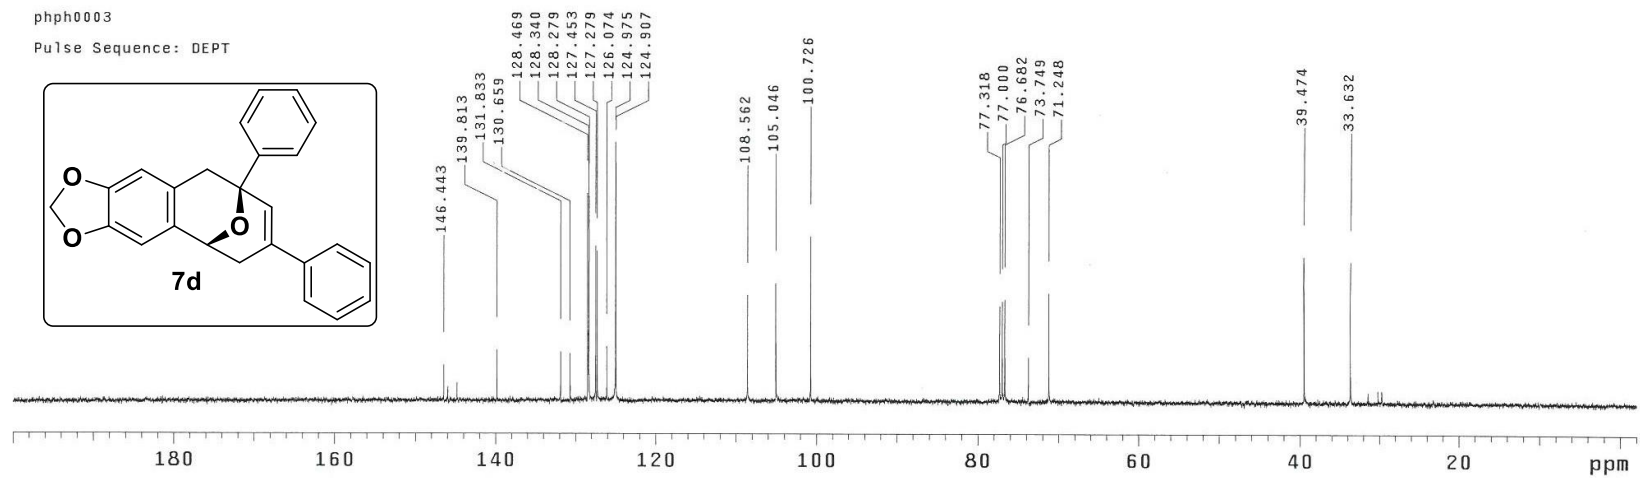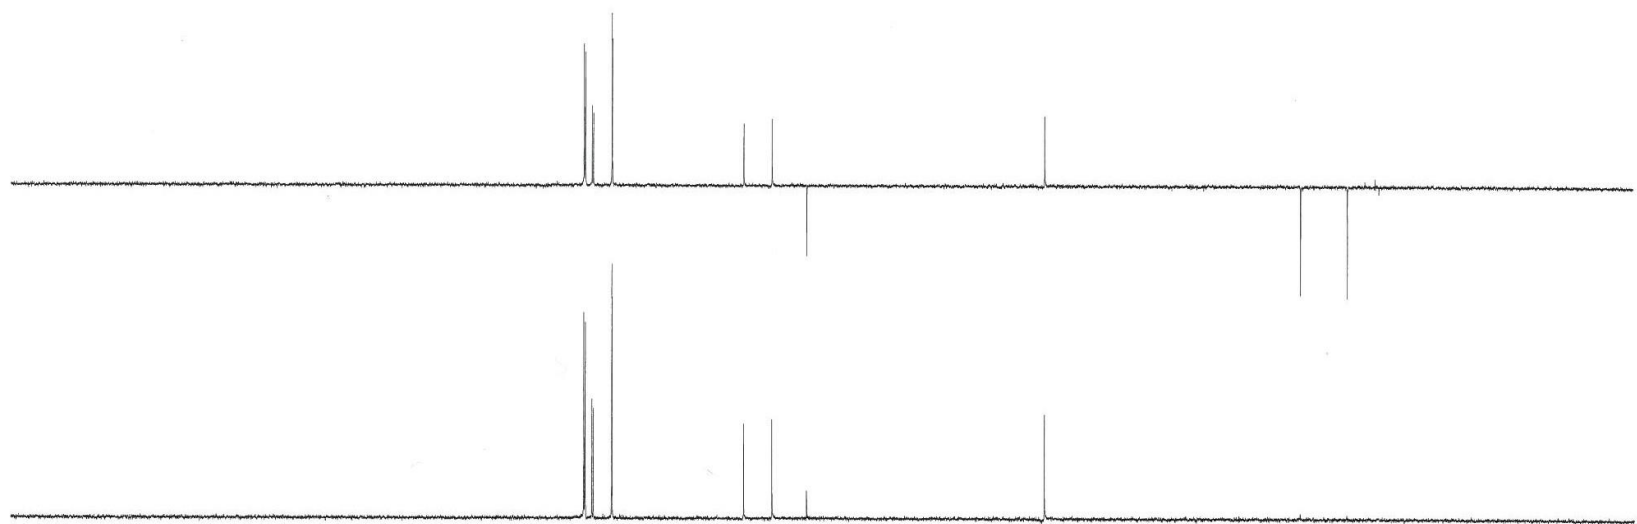

phph0001

Pulse Sequence: s2pu1  
Mercury-400BB "MercuryPlus400"  
Date: Sep 15 2014  
Solvent: CDCl3  
Ambient temperature  
Total 32 repetitions

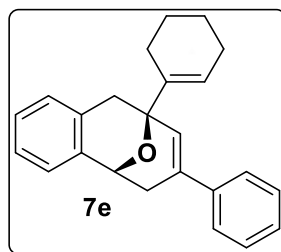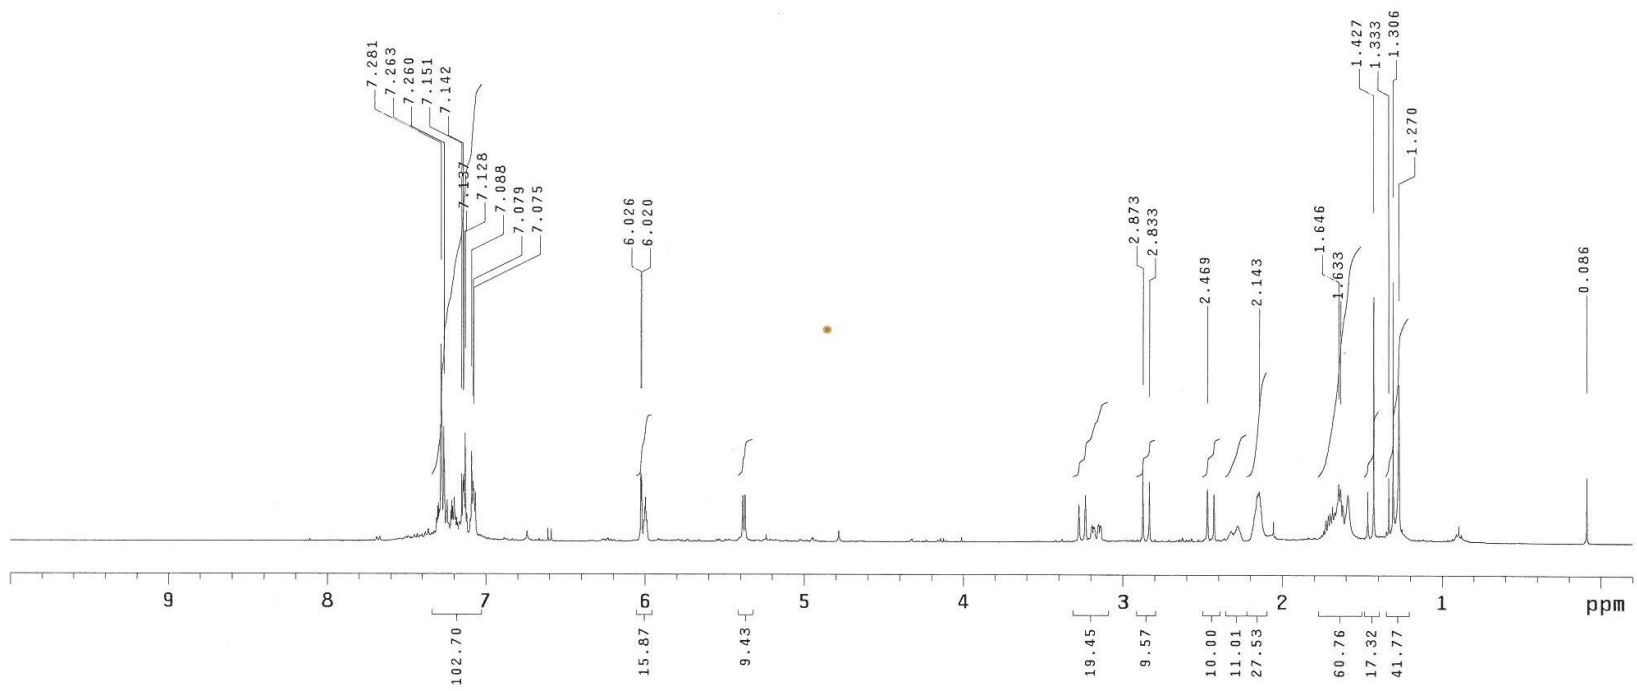



phph0001

Pulse Sequence: s2pu1

Mercury-400BB "MercuryPlus400"

Date: Sep 15 2014

Solvent: CDCl<sub>3</sub>

Ambient temperature

Total 3152 Repetitions

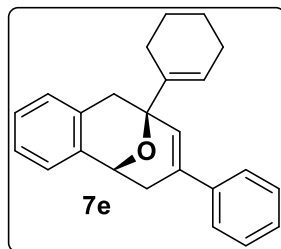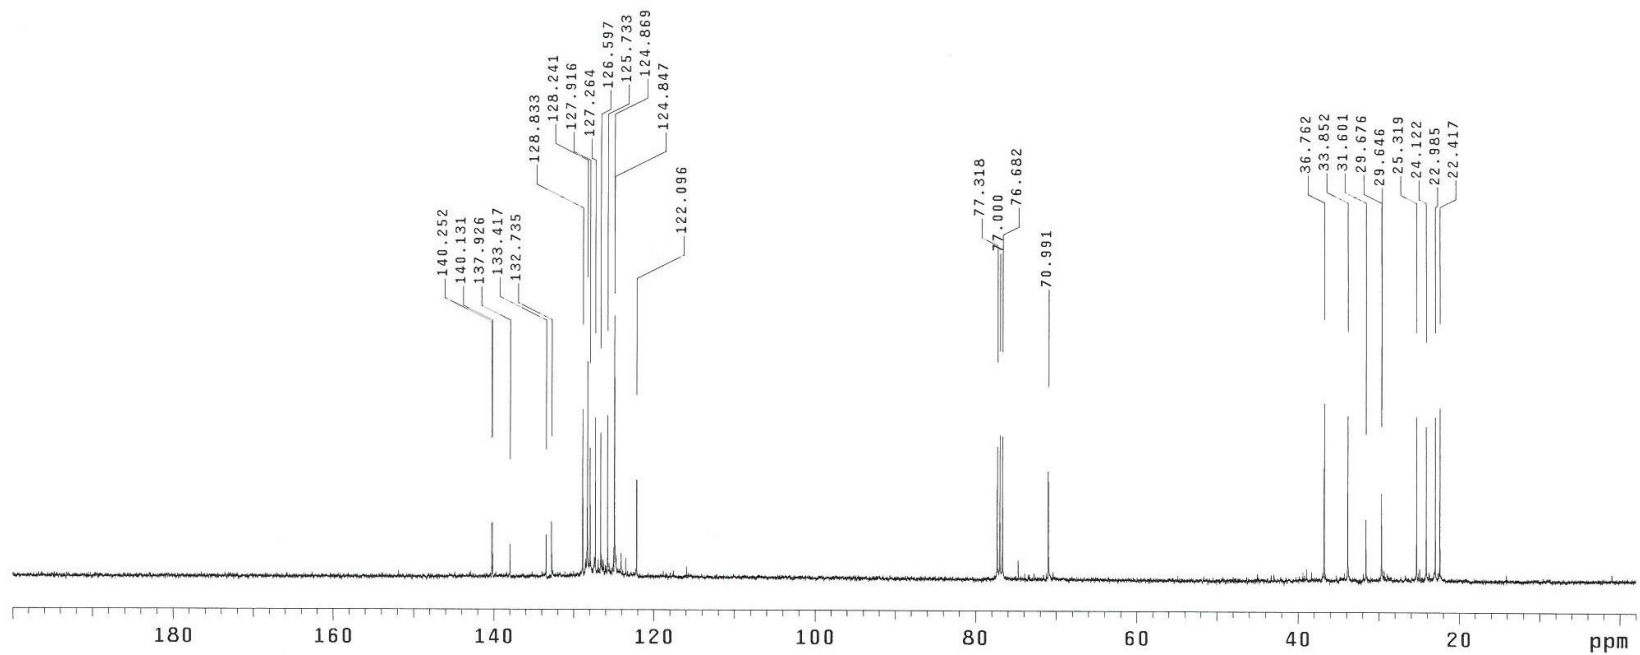

phph0001

Pulse Sequence: DEPT

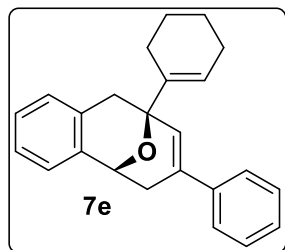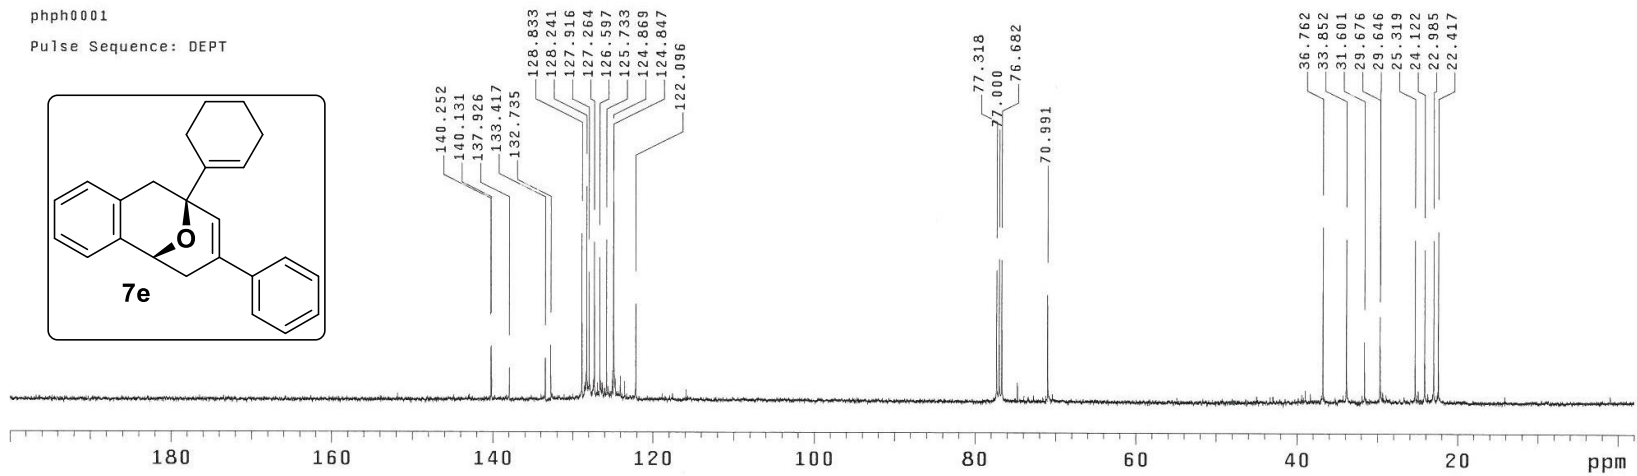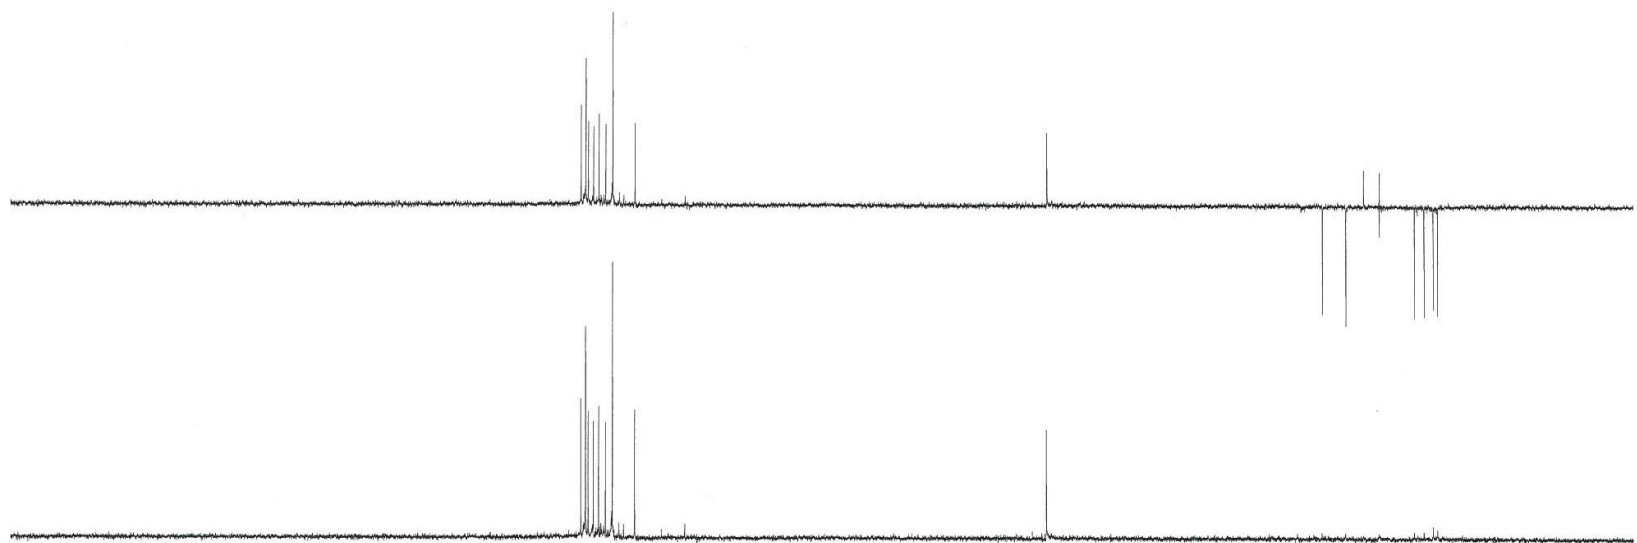

Milu-2014-P088B

Pulse Sequence: s2pu1

Mercury-400BB "MercuryPlus400"

Date: Jun 26 2014

Solvent: CDCl3

Ambient temperature

Total 32 repetitions

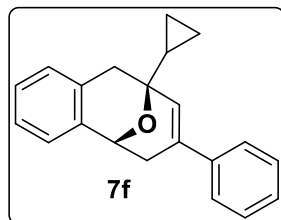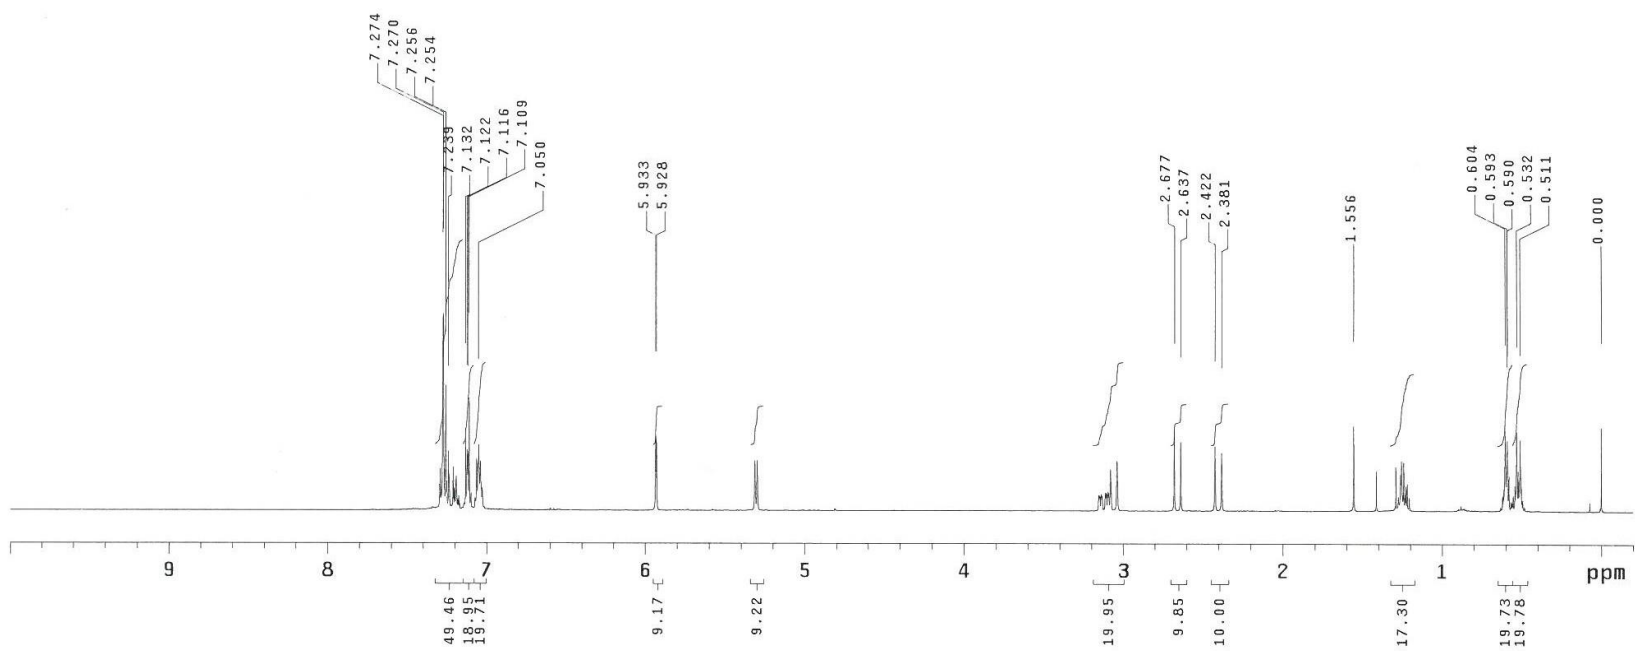

Milu-2014-P088B

Pulse Sequence: s2pu1

Mercury-400BB "MercuryPlus400"

Date: Jun 26 2014

Solvent: CDCl<sub>3</sub>

Ambient temperature

Total 64000 repetitions

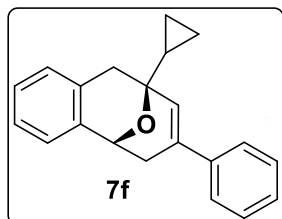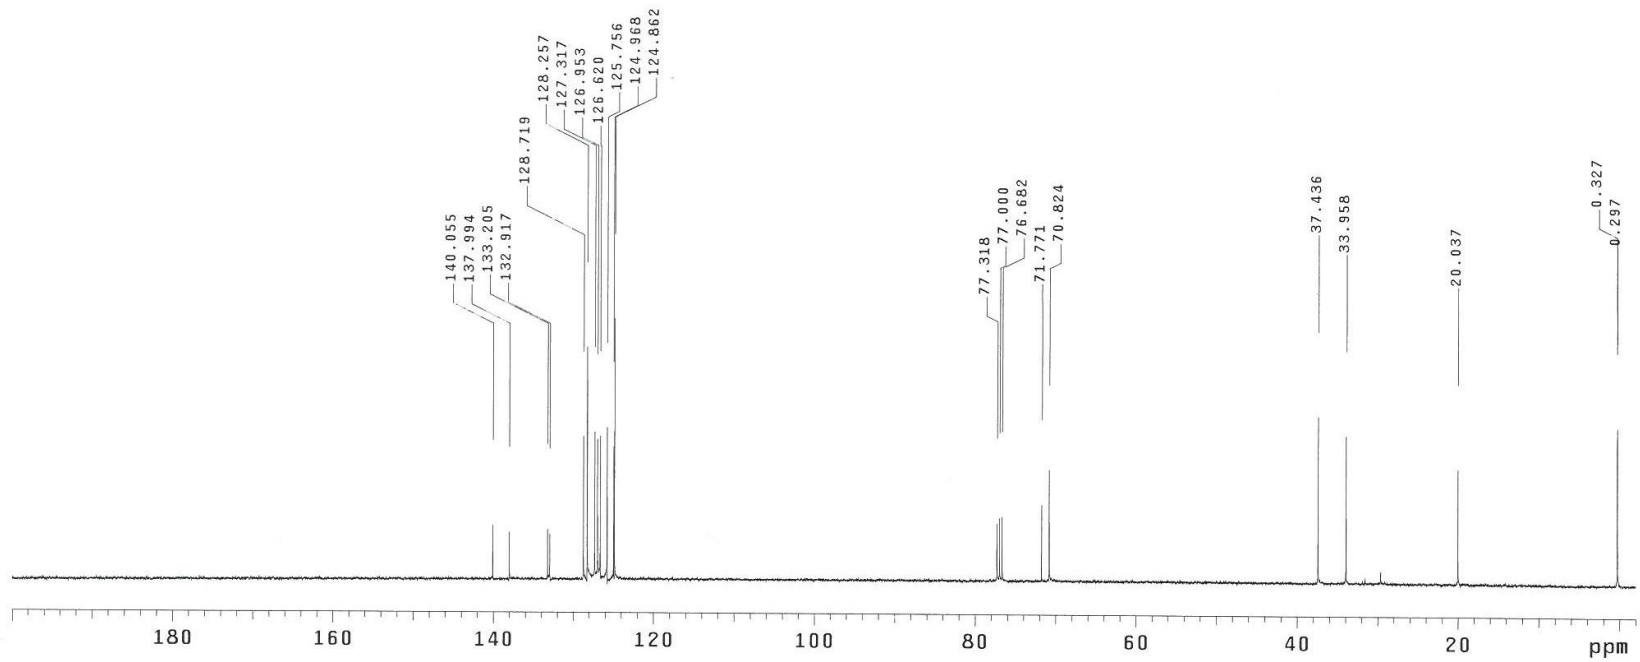

Milu-2014-P088B

Pulse Sequence: DEPT

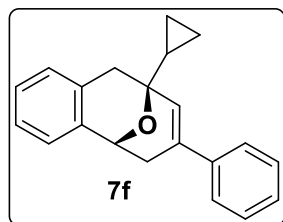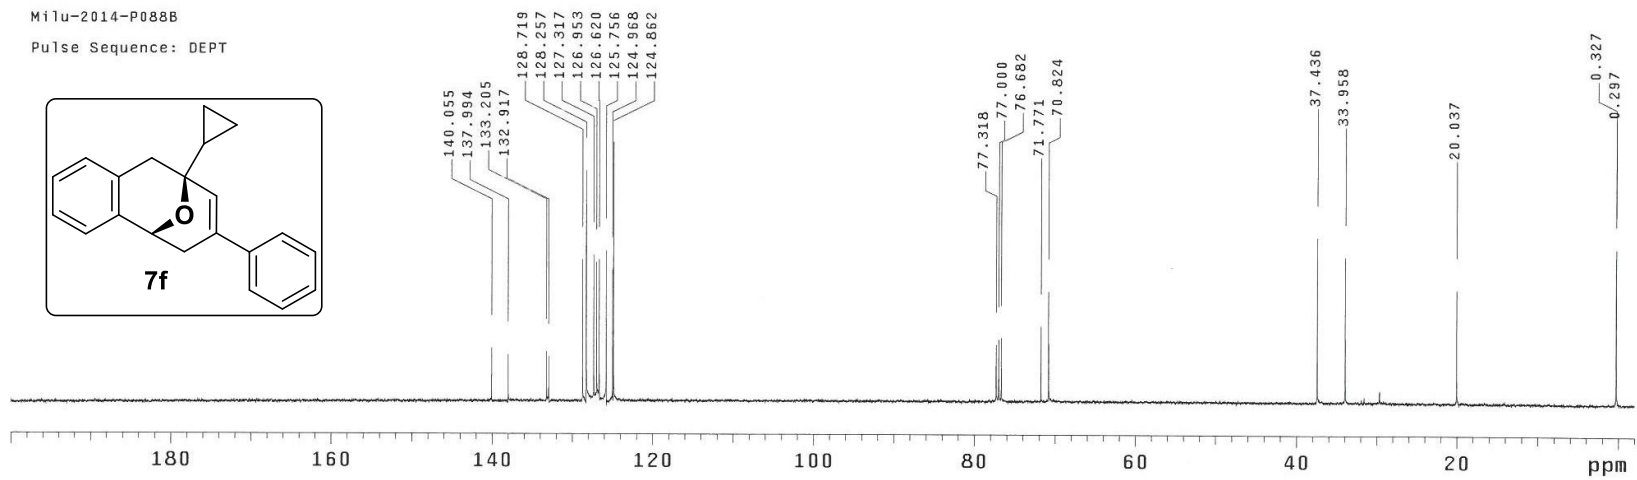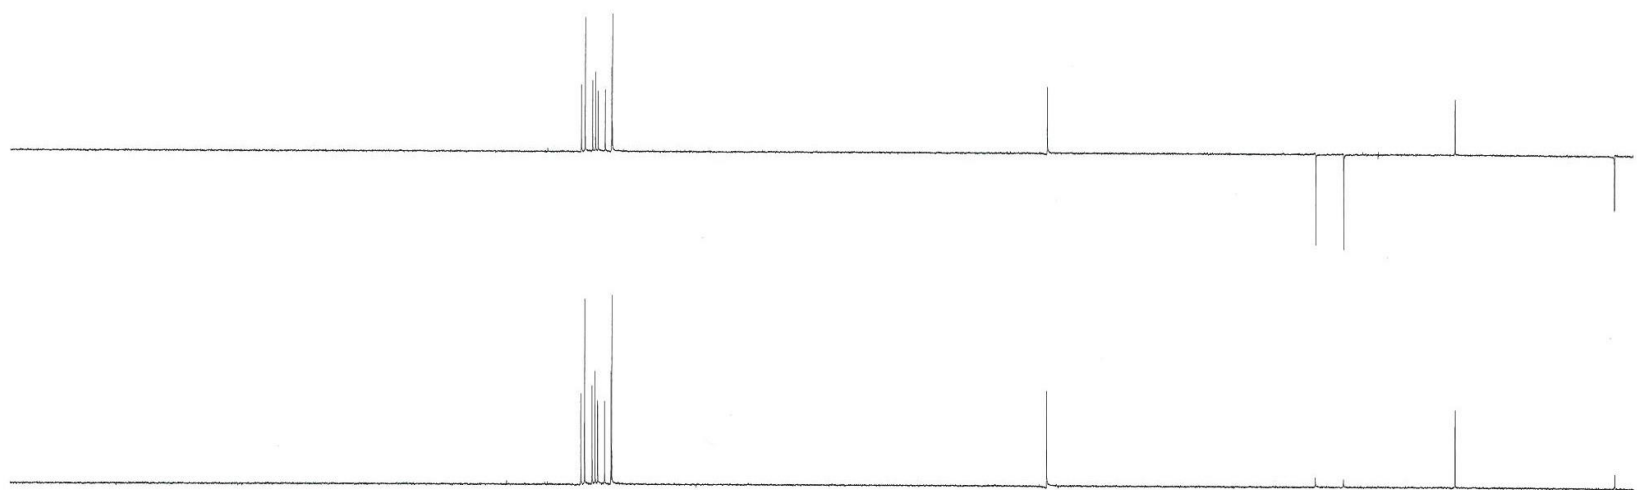

Milu-2014-P015

Pulse Sequence: s2pu1

UNITYplus-400 "unity400"

Date: Apr 7 2014

Solvent: CDC13

Ambient temperature

Total 64 repetitions

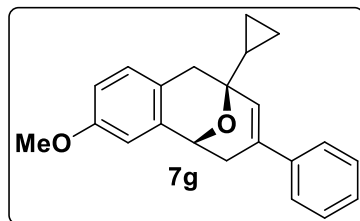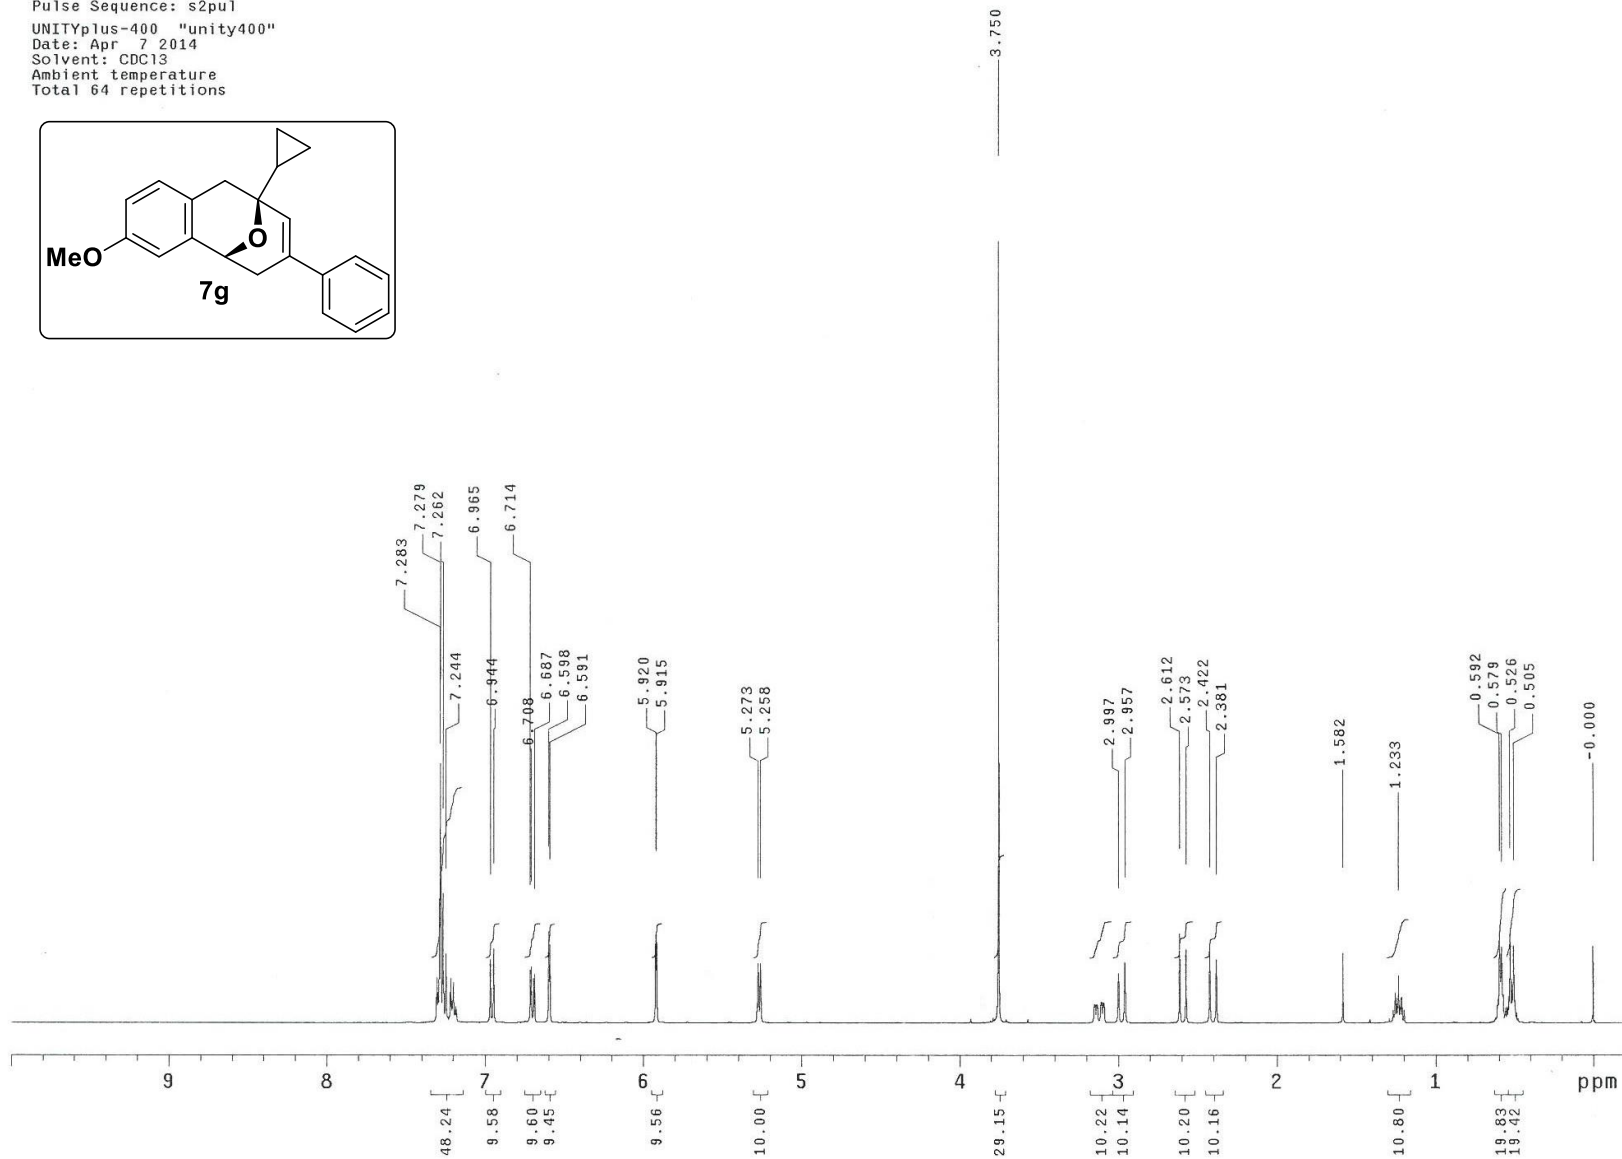

Milu-2014-P015

Pulse Sequence: s2pu1

UNITYplus-400 "unity400"

Date: Apr 7 2014

Solvent: CDC13

Ambient temperature

Total 64000 repetitions

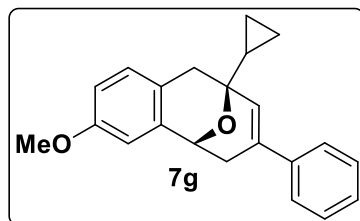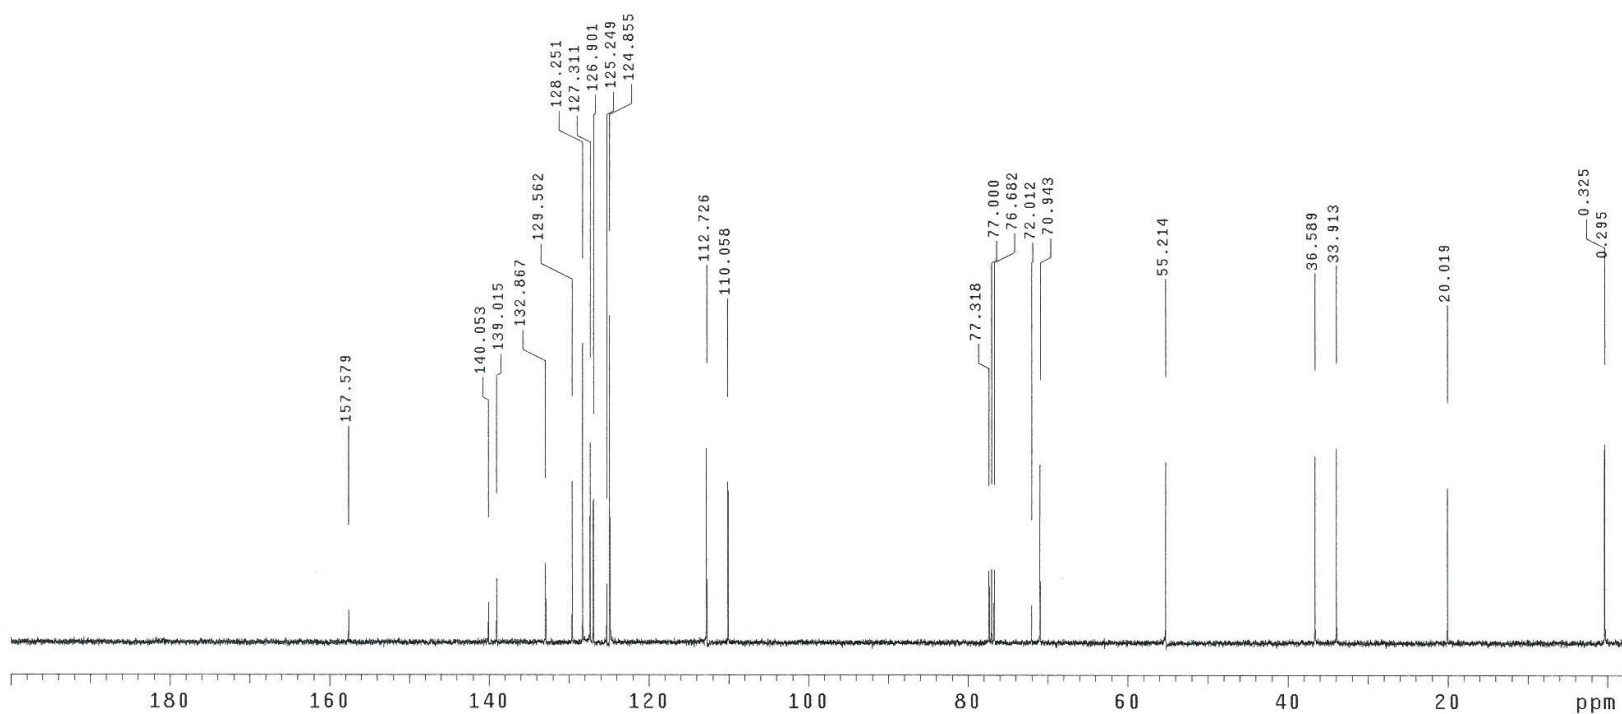

Milu-2014-P015

Pulse Sequence: DEPT

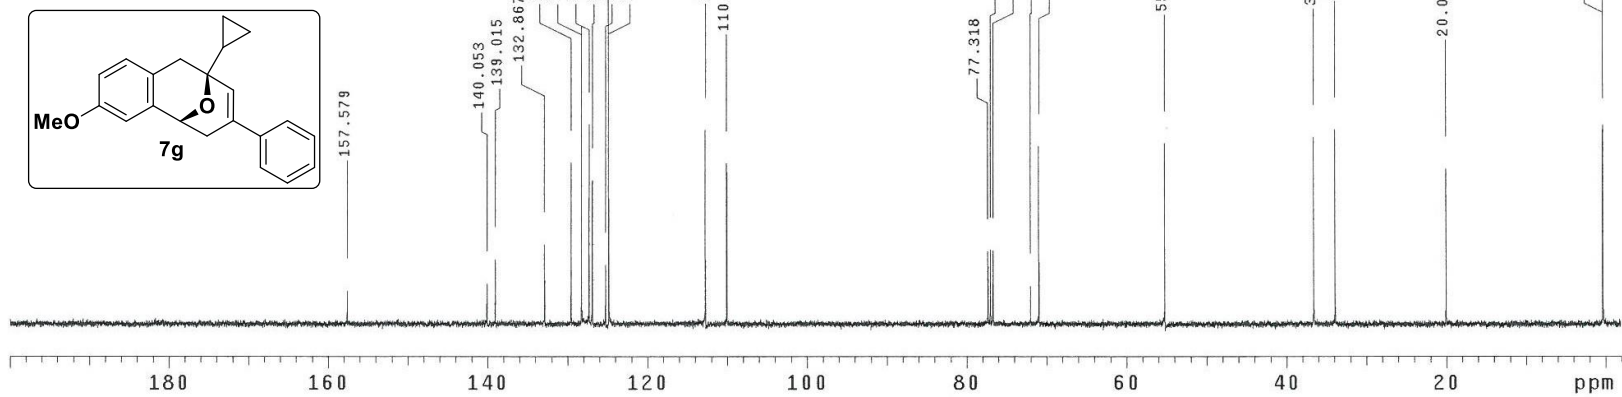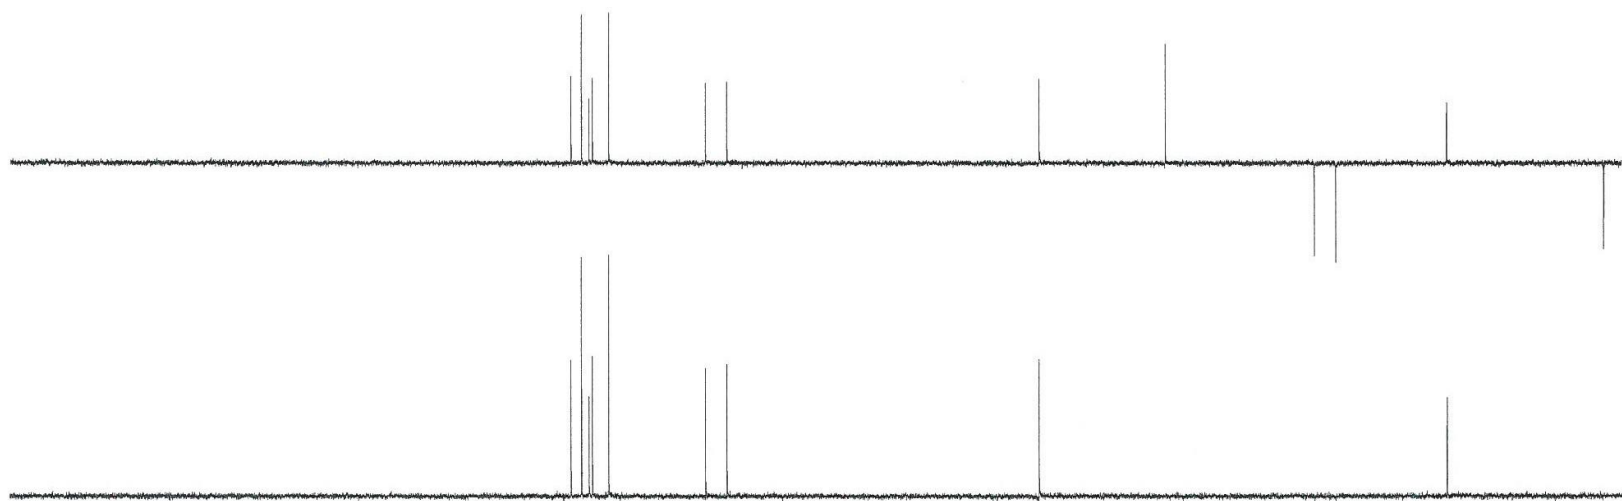



Milu-2014-P031

Pulse Sequence: s2pu1

UNITYplus-400 "unity400"

Date: Apr 21 2014

Solvent: CDC13

Ambient temperature

Total 64 repetitions

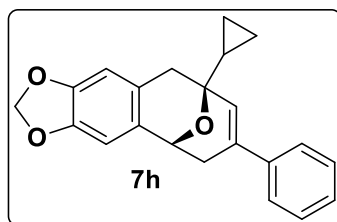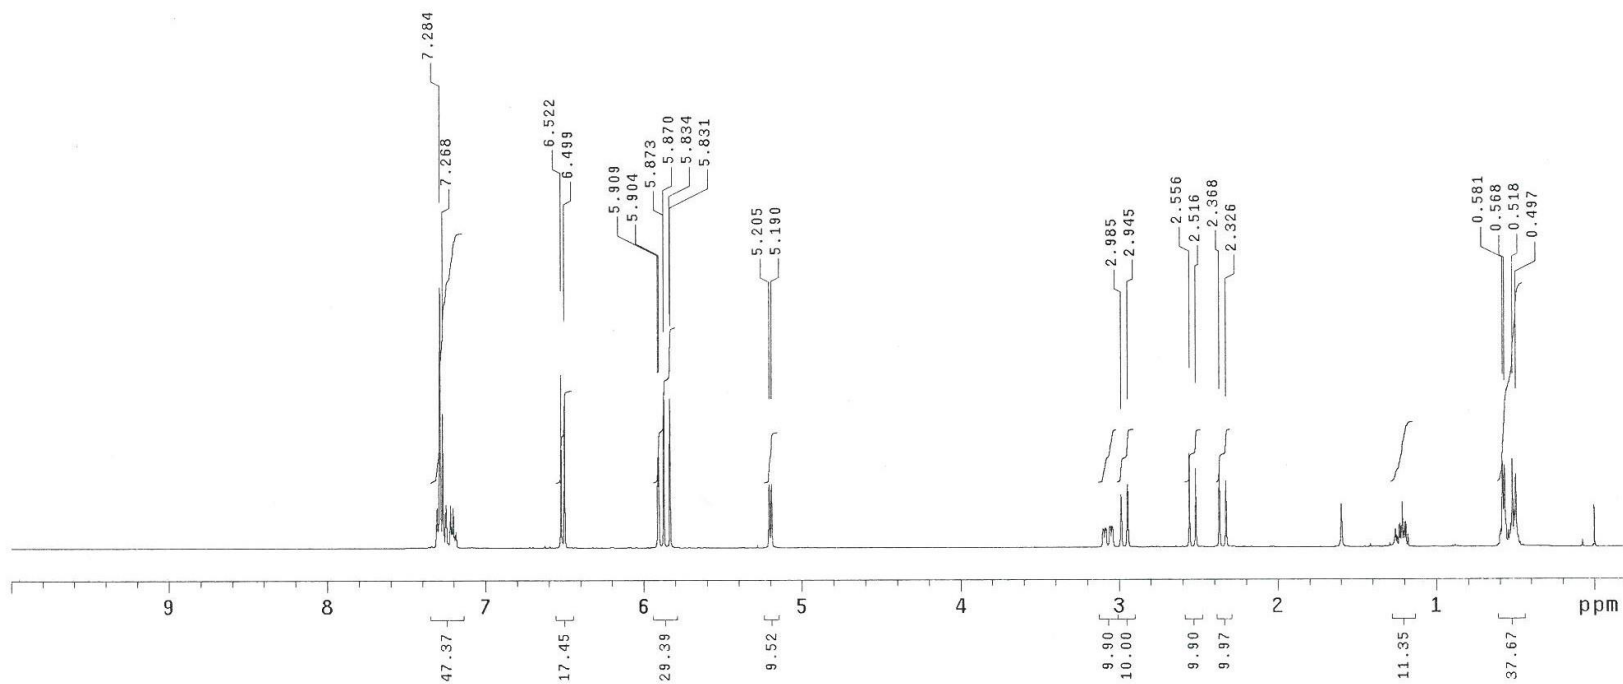

Milu-2014-P031

Pulse Sequence: s2pu1

UNITYplus-400 "unity400"

Date: Apr 21 2014

Solvent: CDC13

Ambient temperature

Total 1744 repetitions

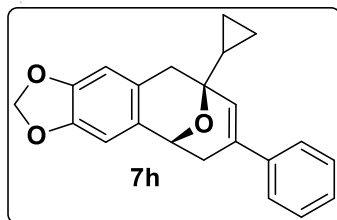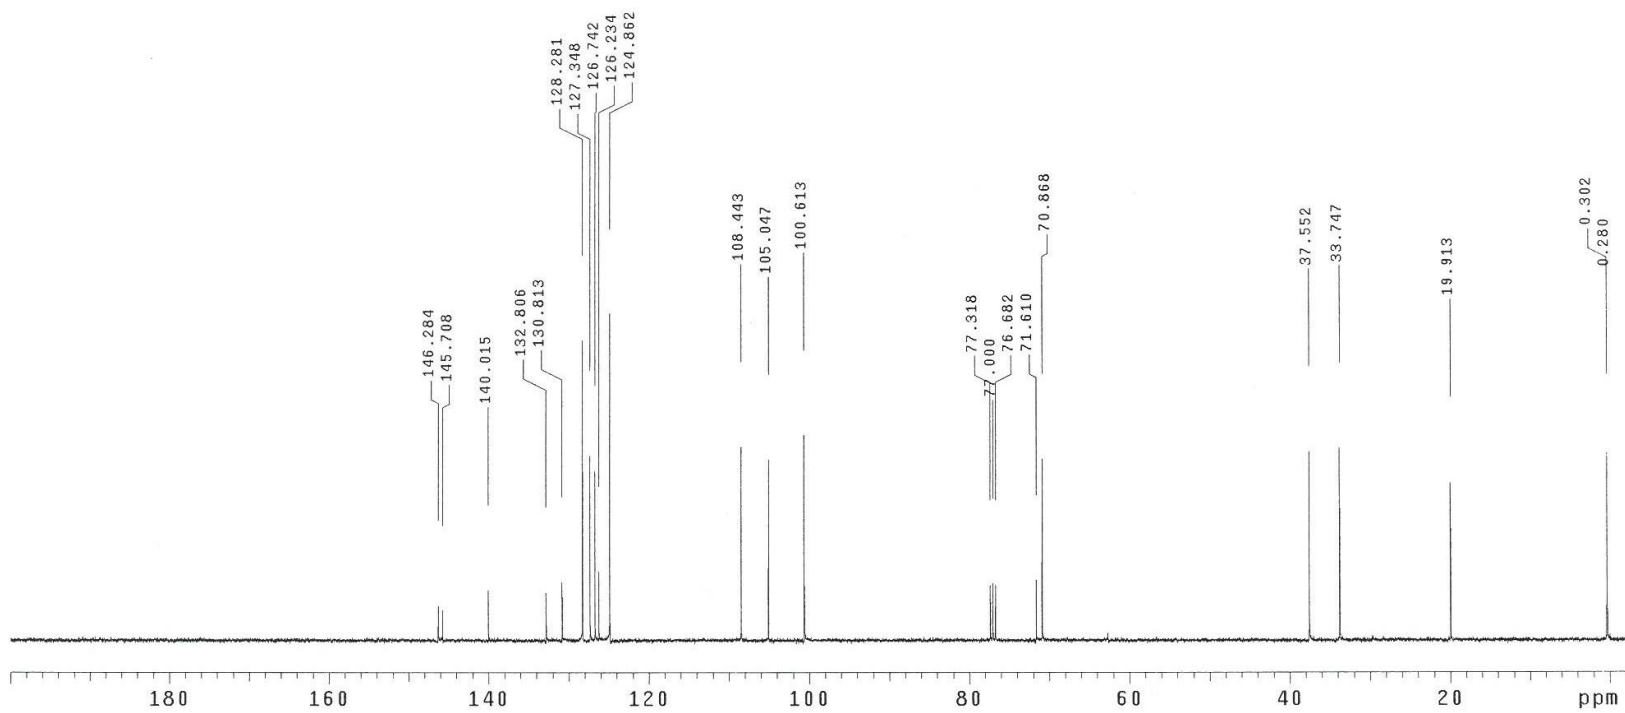

M11u-2014-P031

Pulse Sequence: DEPT

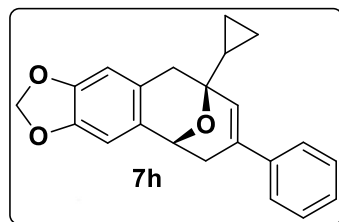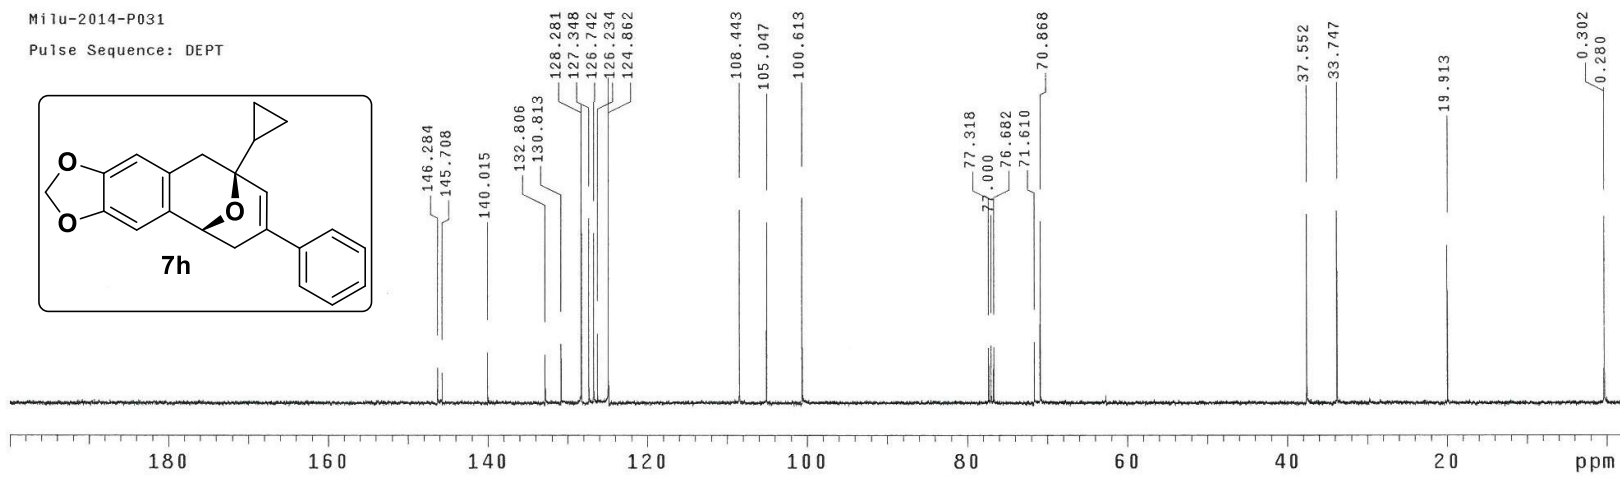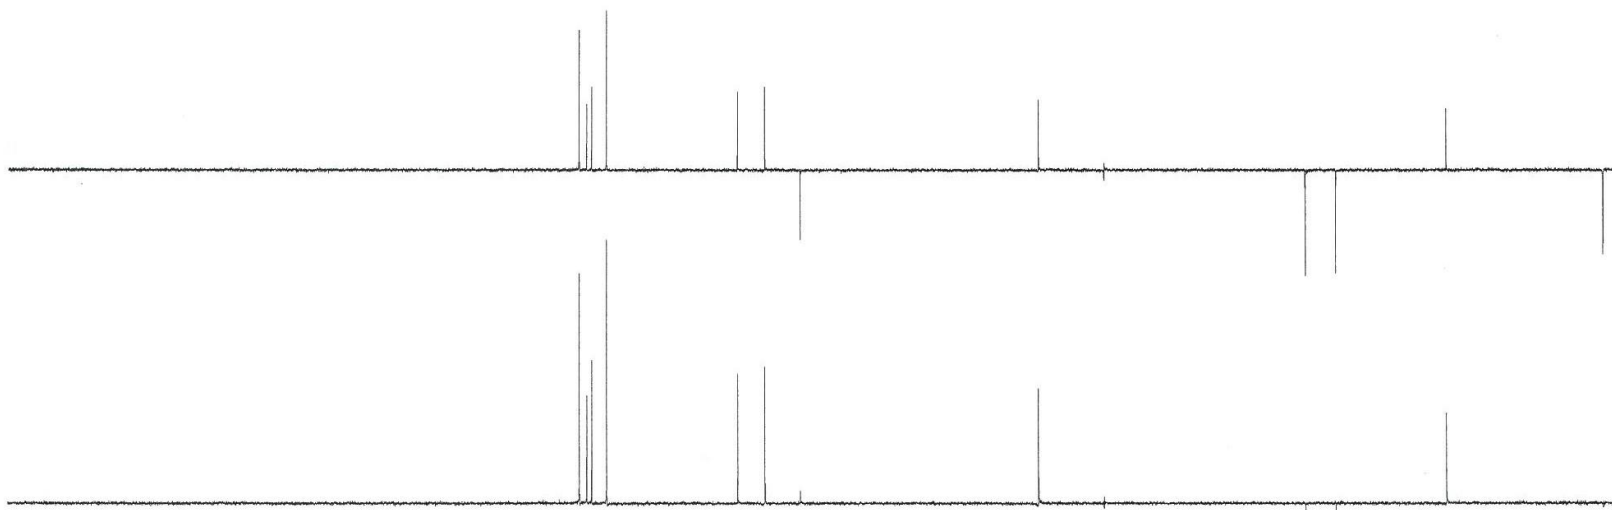

Jaya-BC2014-73

Pulse Sequence: s2pu1

Mercury-400BB "MercuryPlus400"

Date: Dec 25 2014

Solvent: CDCl3

Ambient temperature

Total 32 repetitions

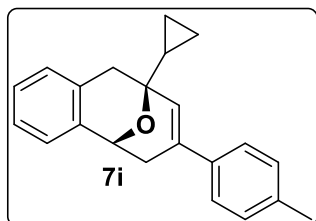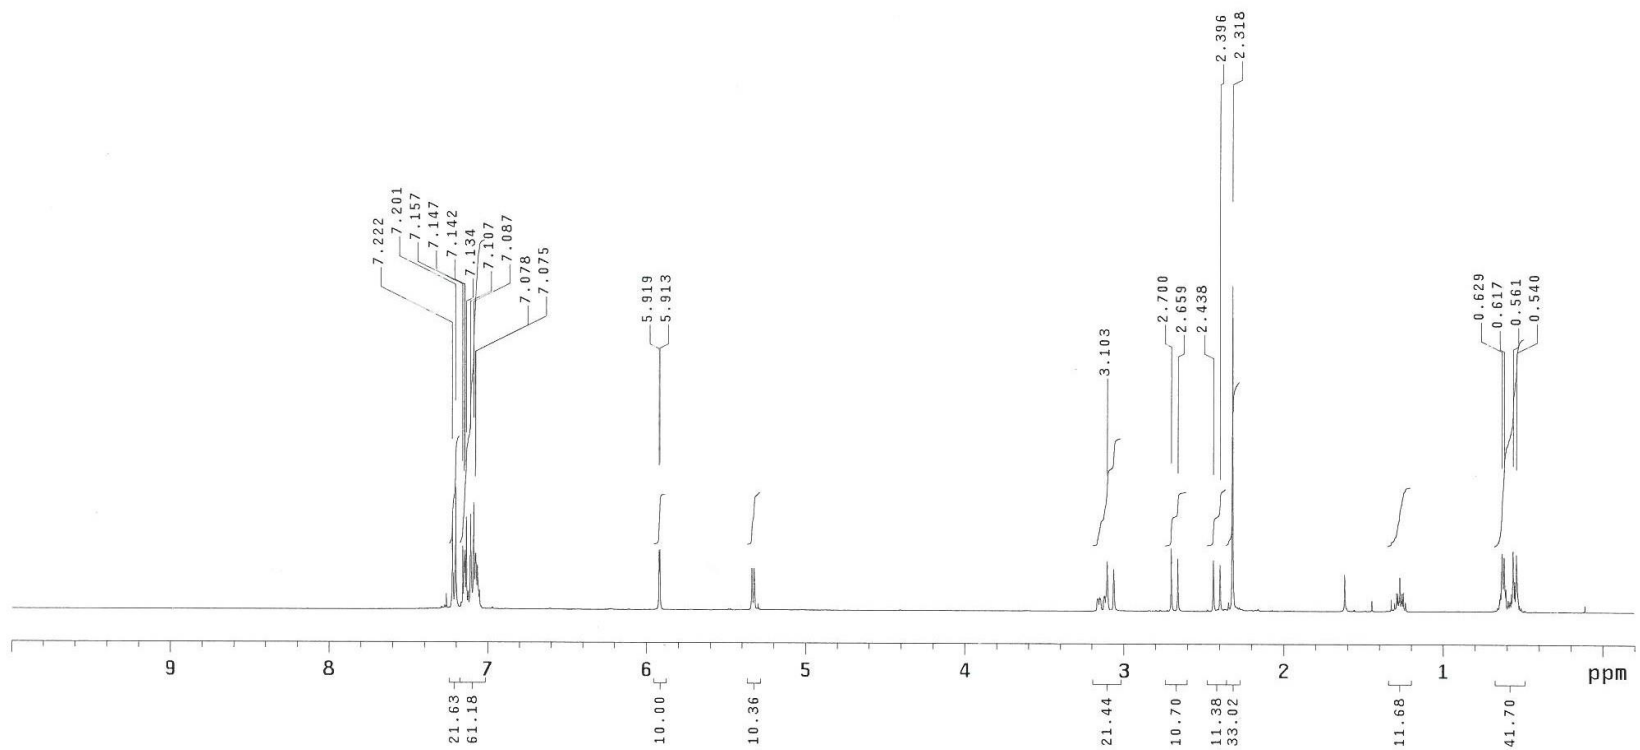

Jaya-BC2014-73

Pulse Sequence: s2pu1

Mercury-400BB "MercuryPlus400"

Date: Dec 25 2014

Solvent: CDCl3

Ambient temperature

Total 656 repetitions

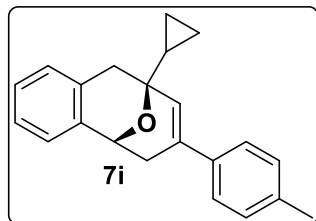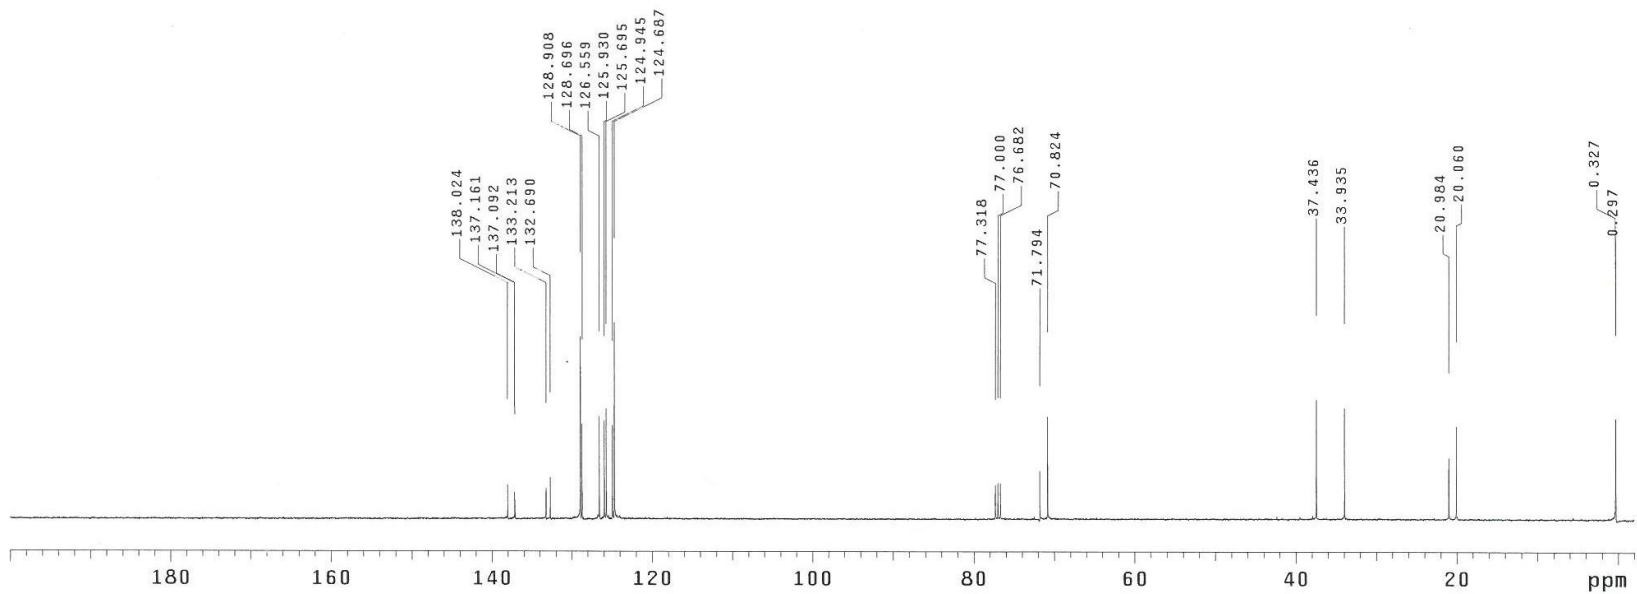

Jaya-BC2014-73

Pulse Sequence: DEPT

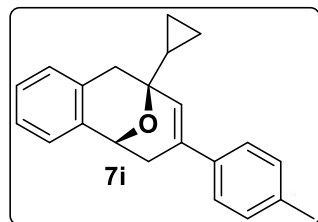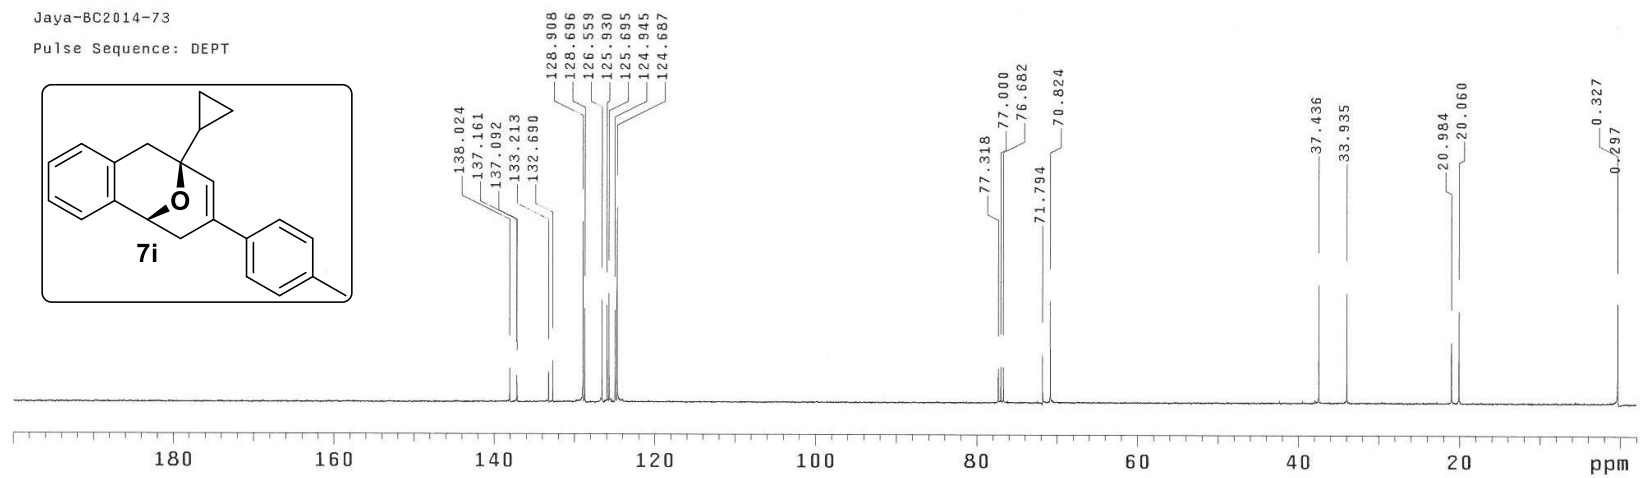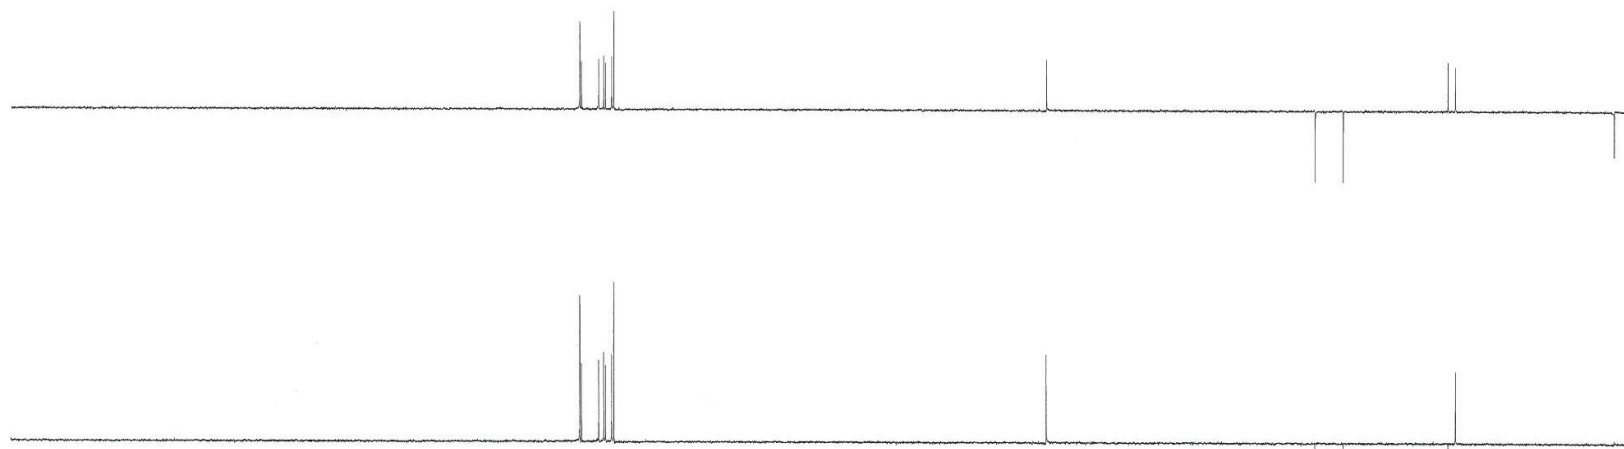

phph0002

Pulse Sequence: s2pu1

Mercury-400BB "MercuryPlus400"

Date: Sep 15 2014

Solvent: CDCl3

Ambient temperature

Total 32 repetitions

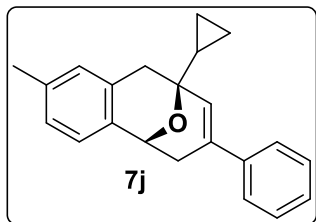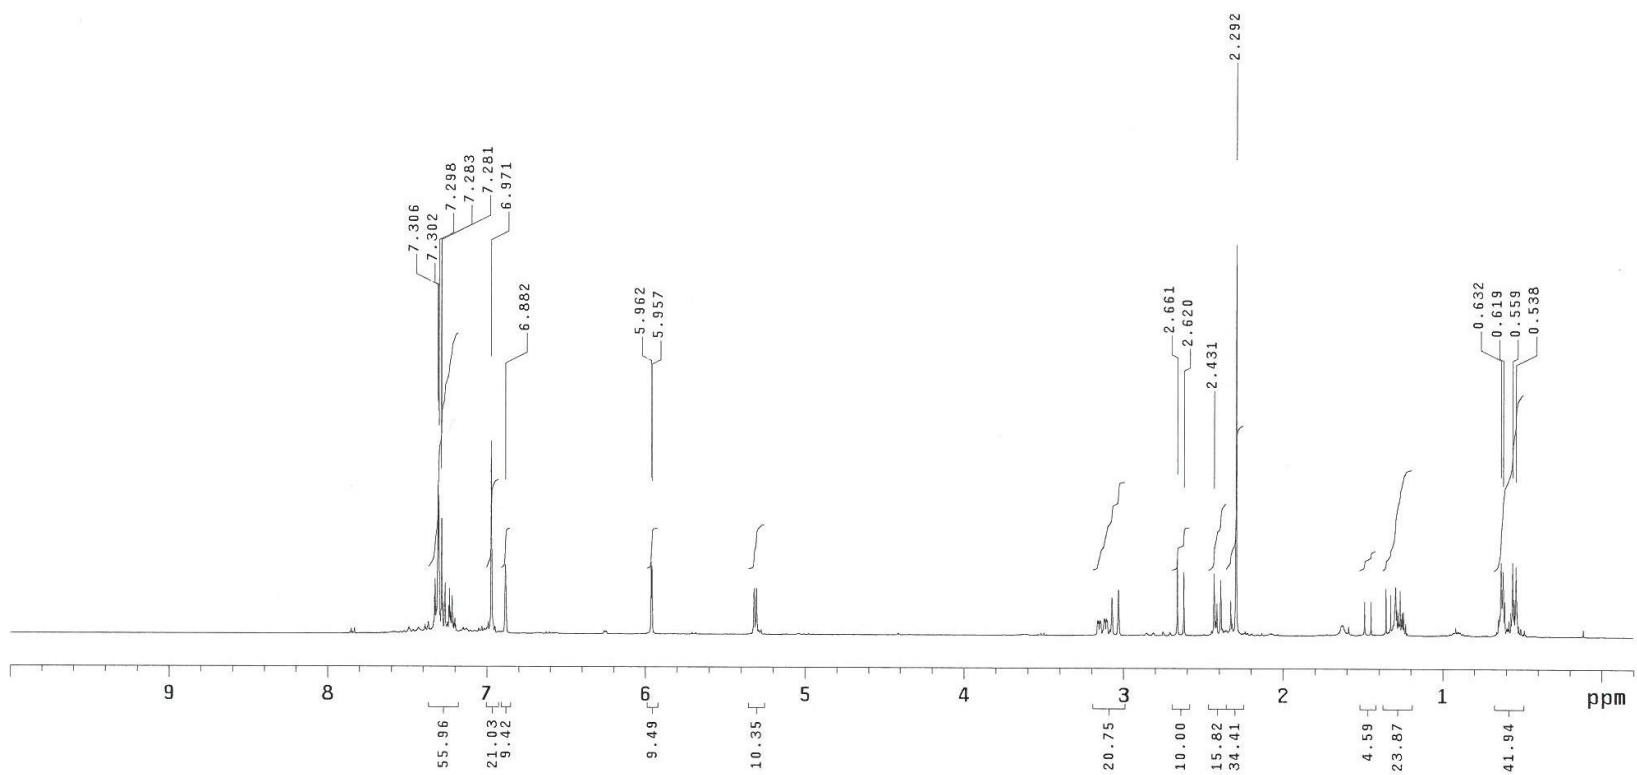

phph0002

Pulse Sequence: s2pu1

Mercury-400BB "MercuryPlus400"

Date: Sep 15 2014

Solvent: CDCl3

Ambient temperature

Total 336 repetitions

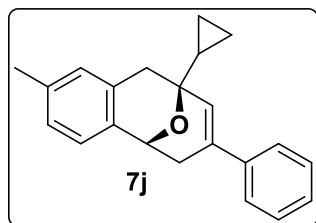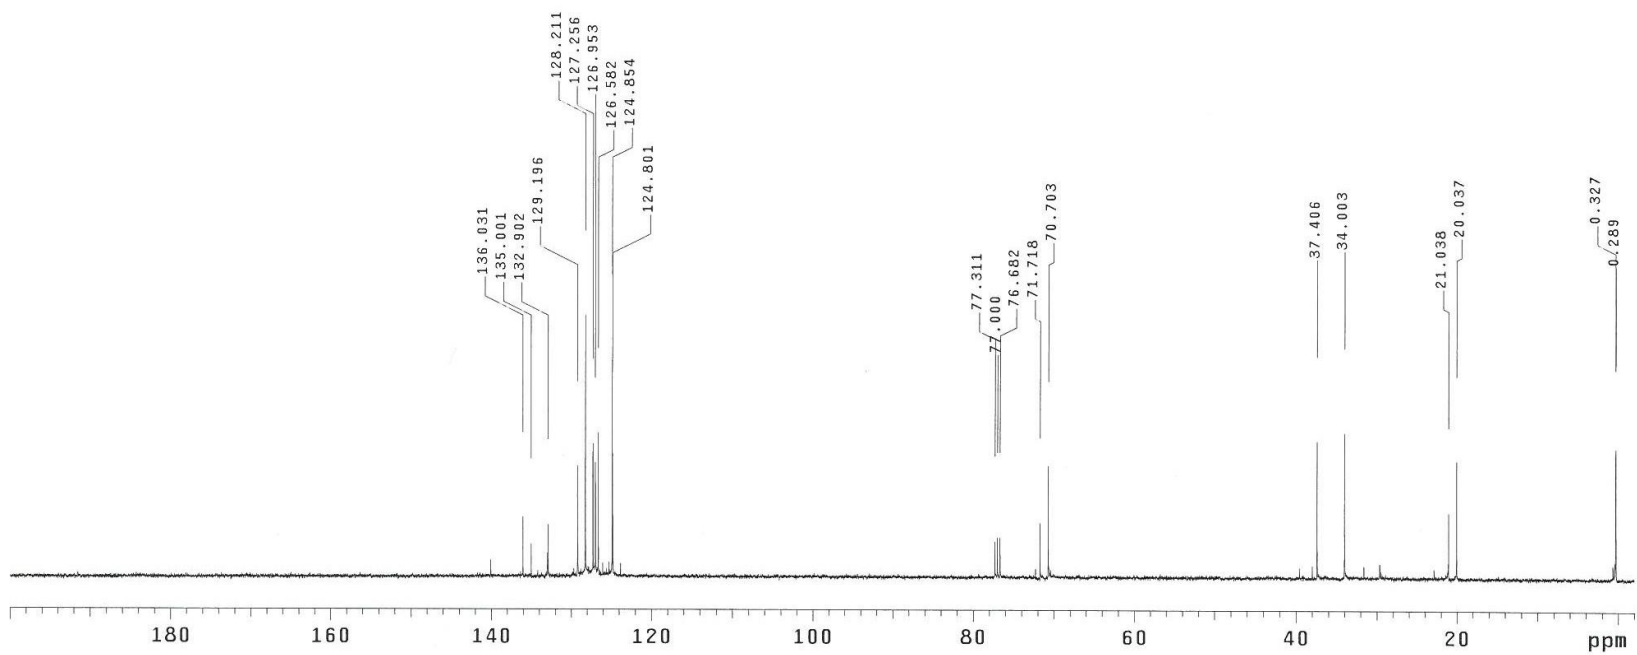



phph0002

Pulse Sequence: DEPT

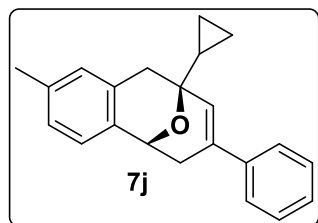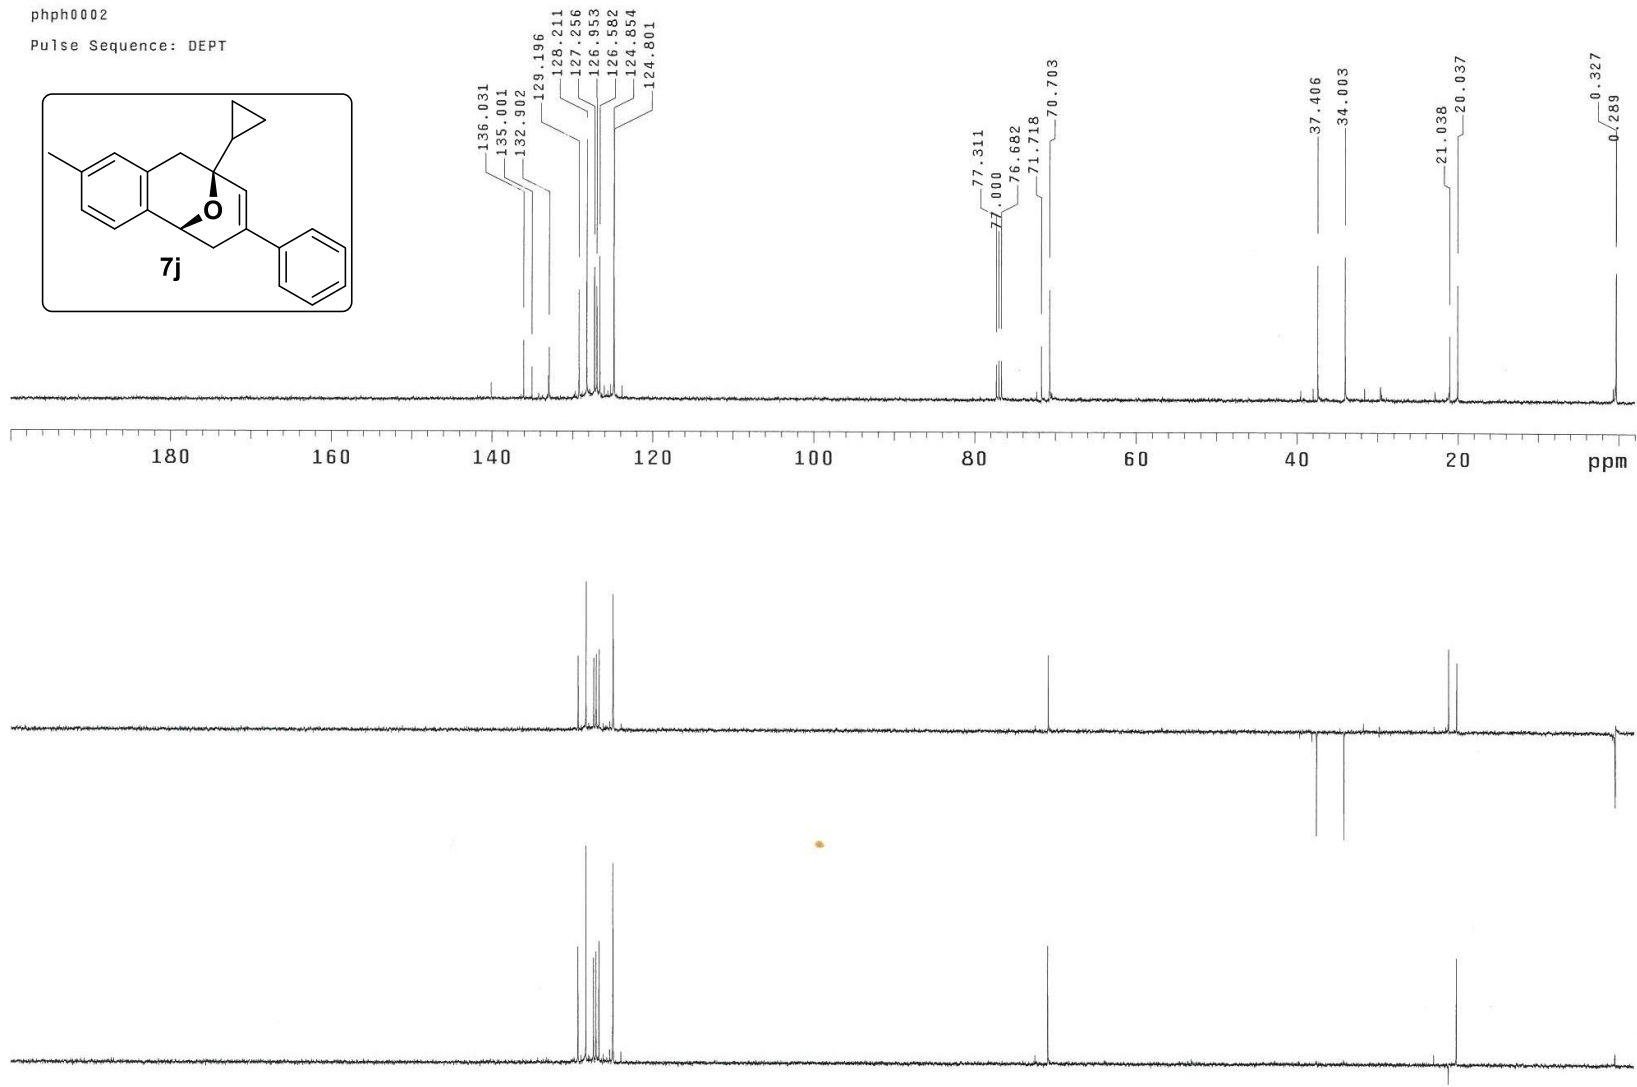

phph0010

Pulse Sequence: s2pu1

Mercury-400BB "MercuryPlus400"

Date: Sep 17 2014

Solvent: CDC13

Ambient temperature

Total 32 repetitions

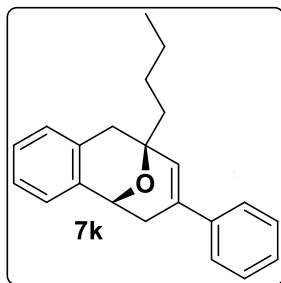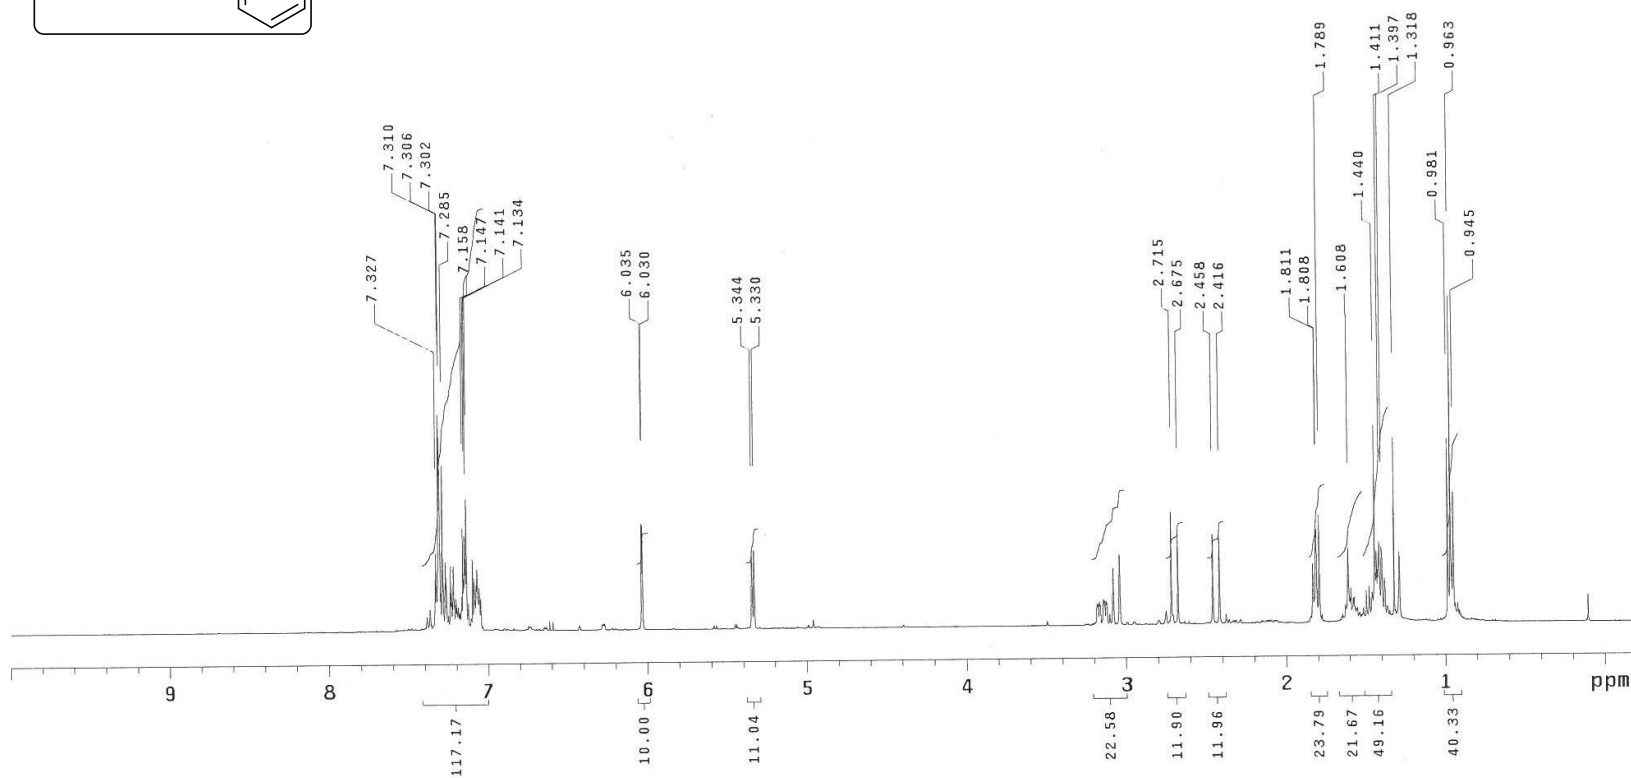

phph0010

Pulse Sequence: s2pu1

Mercury-400BB "MercuryPlus400"

Date: Sep 17 2014

Solvent: CDCl<sub>3</sub>

Ambient temperature

Total 2016 repetitions

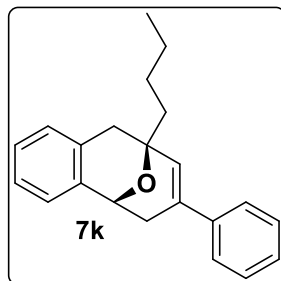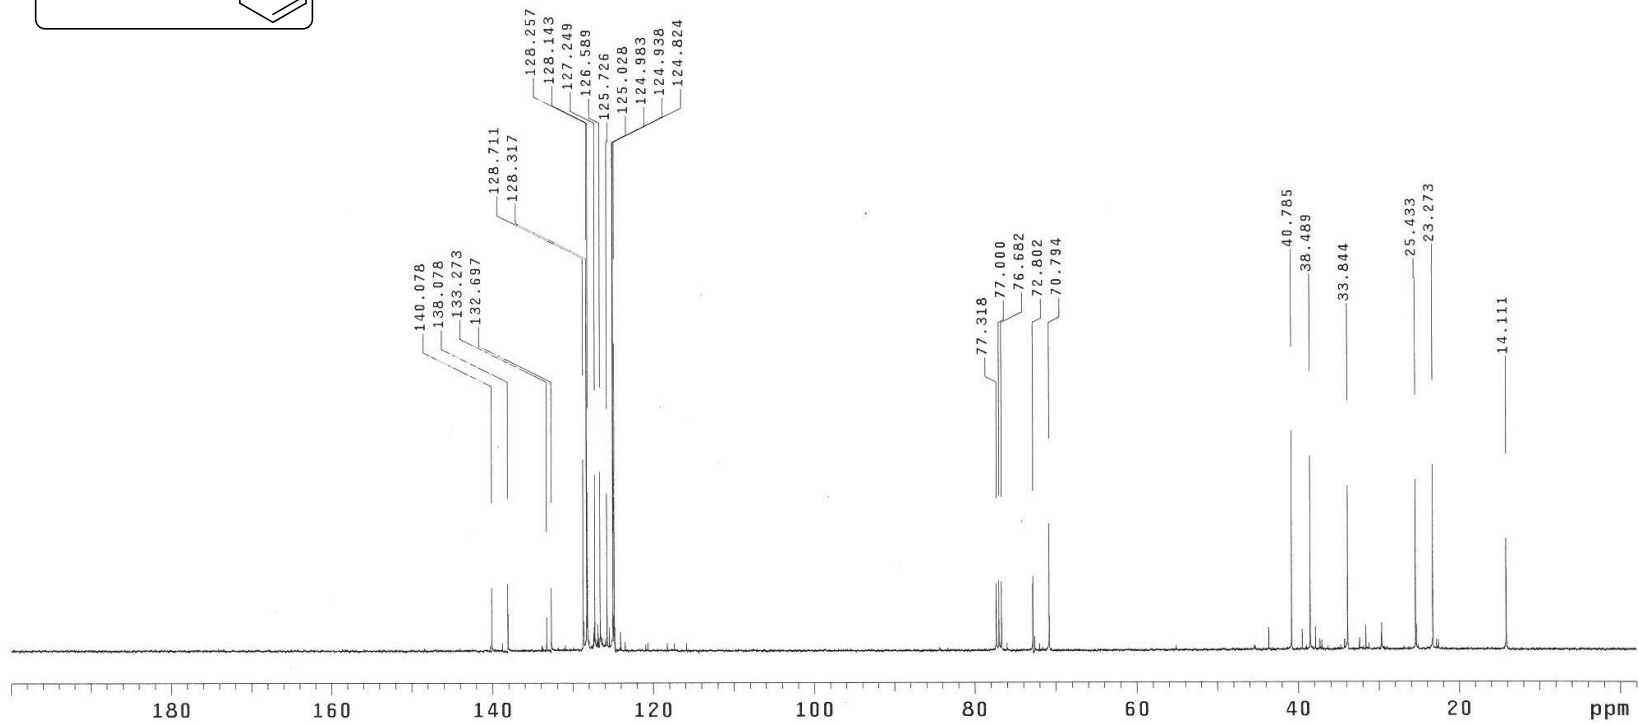

phph0010

Pulse Sequence: DEPT

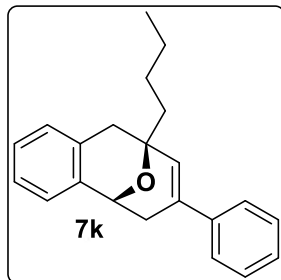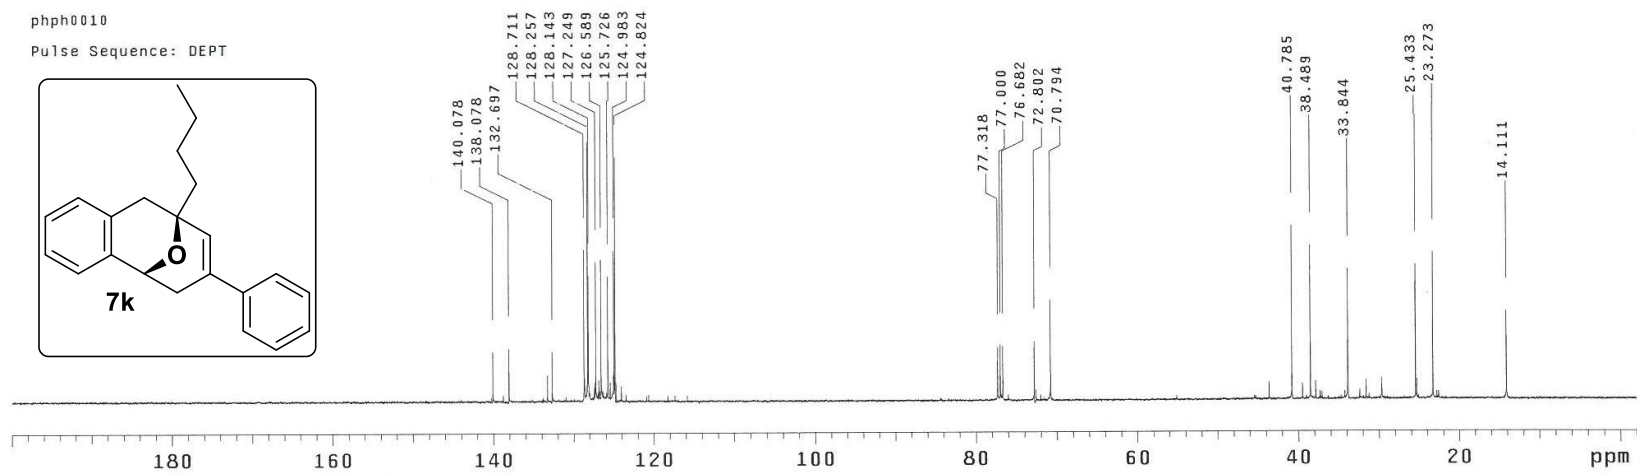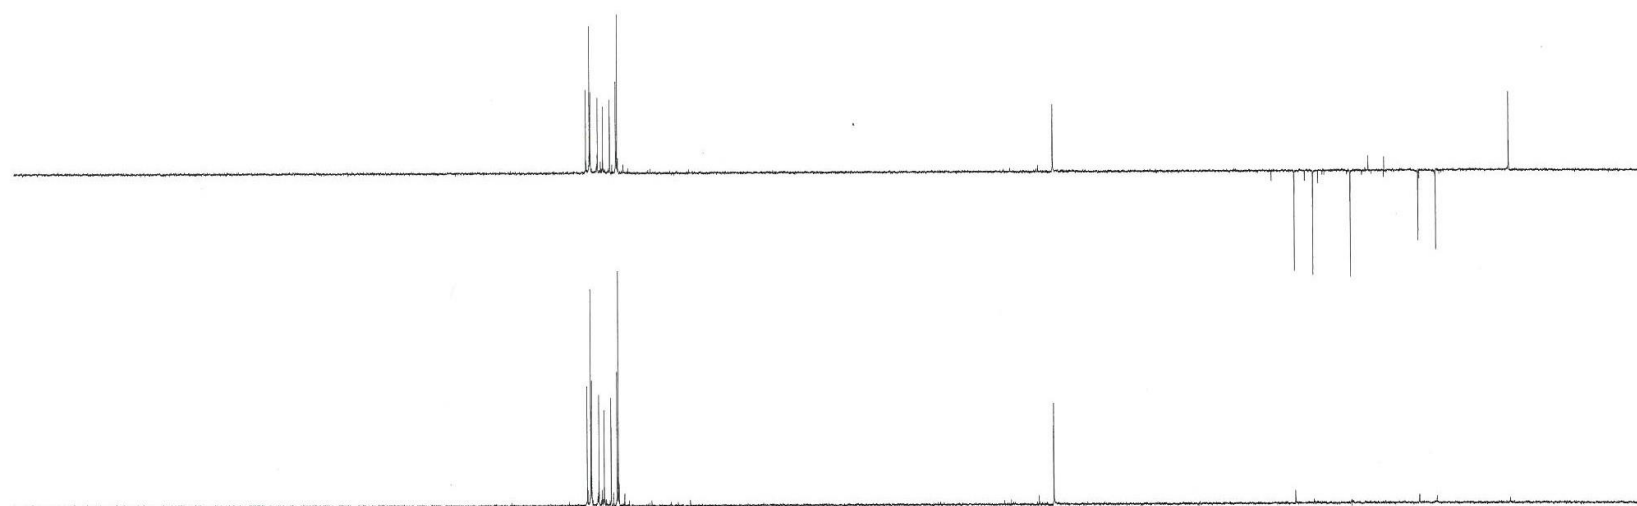

Milu-2014-P079B

Pulse Sequence: s2pul  
UNITYplus-400 "unity400"  
Date: Jun 19 2014  
Solvent: CDC13  
Ambient temperature  
File: U0119-4  
Total 160 repetitions

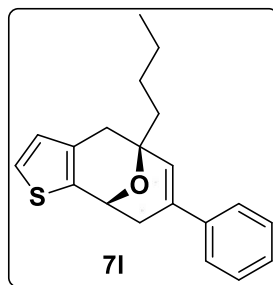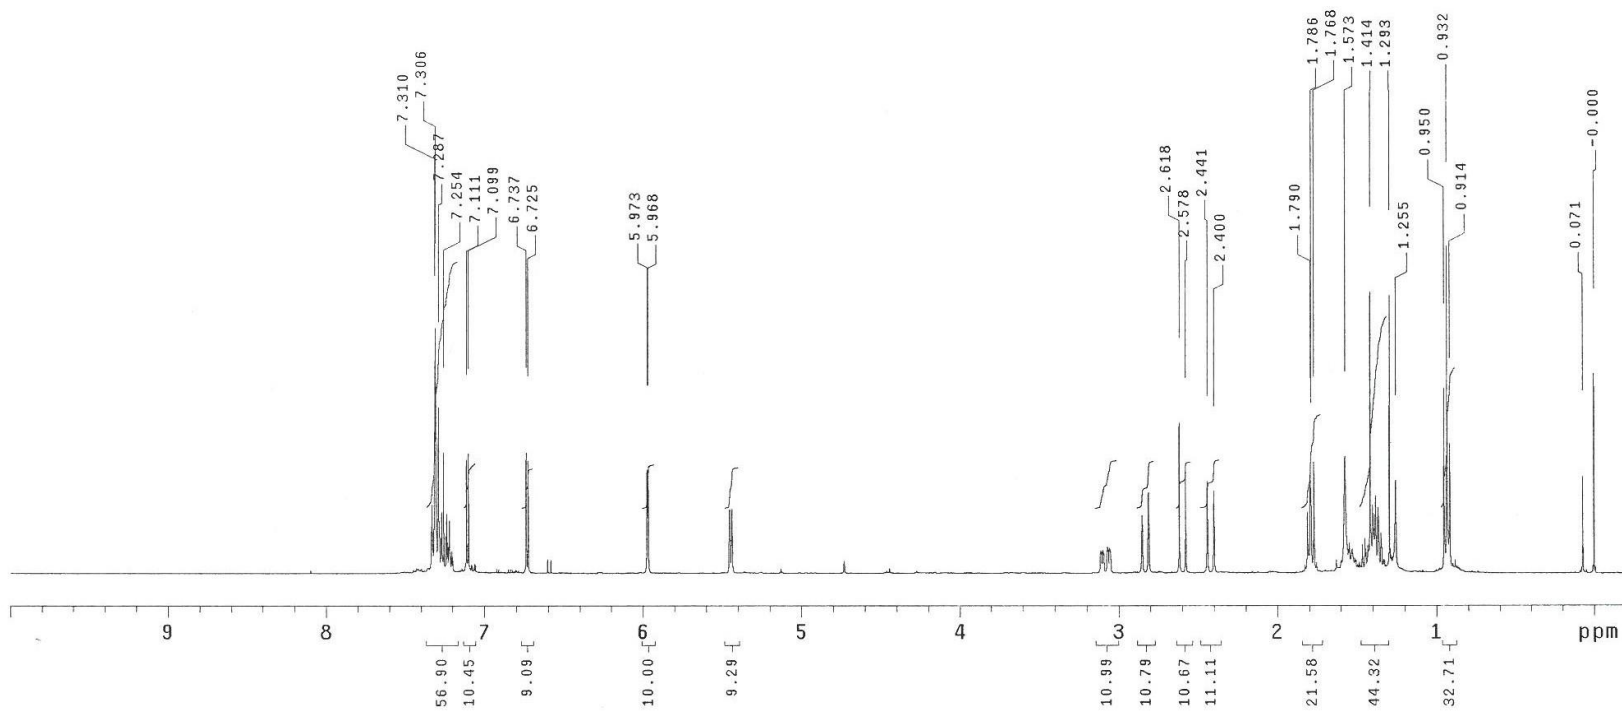

Milu-2014-P079B

Pulse Sequence: s2pu1  
UNITYplus-400 "unity400"  
Date: Jun 19 2014  
Solvent: CDC13  
Ambient temperature  
Total 16000 repetitions

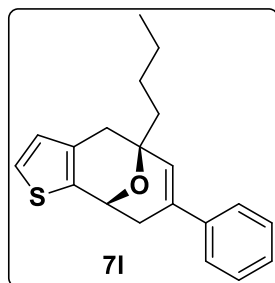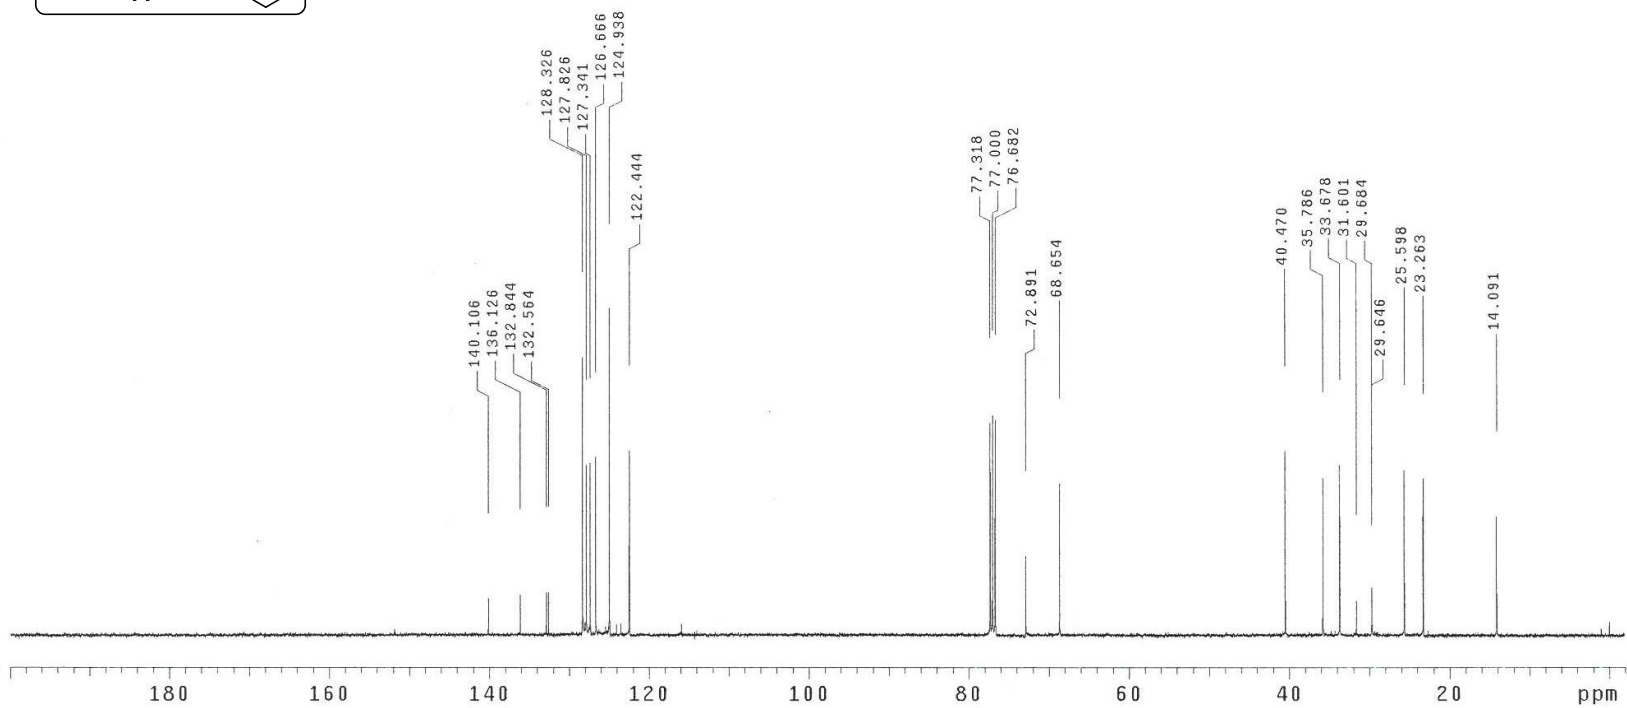

Milu-2014-P079B

Pulse Sequence: DEPT

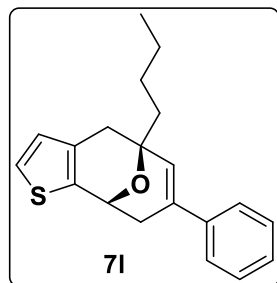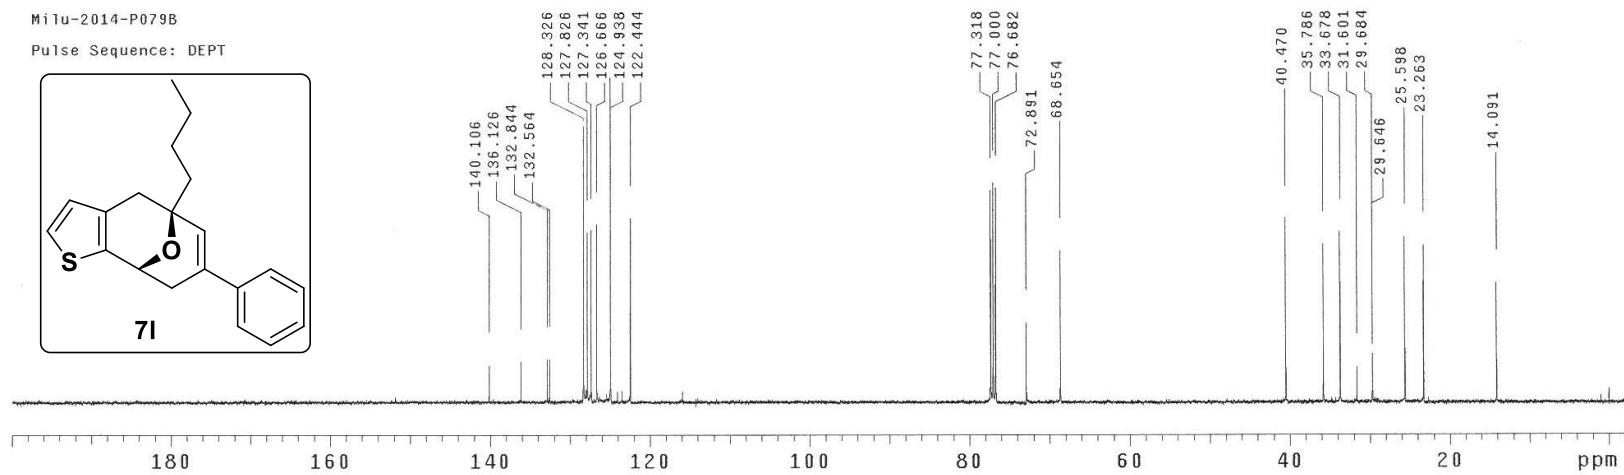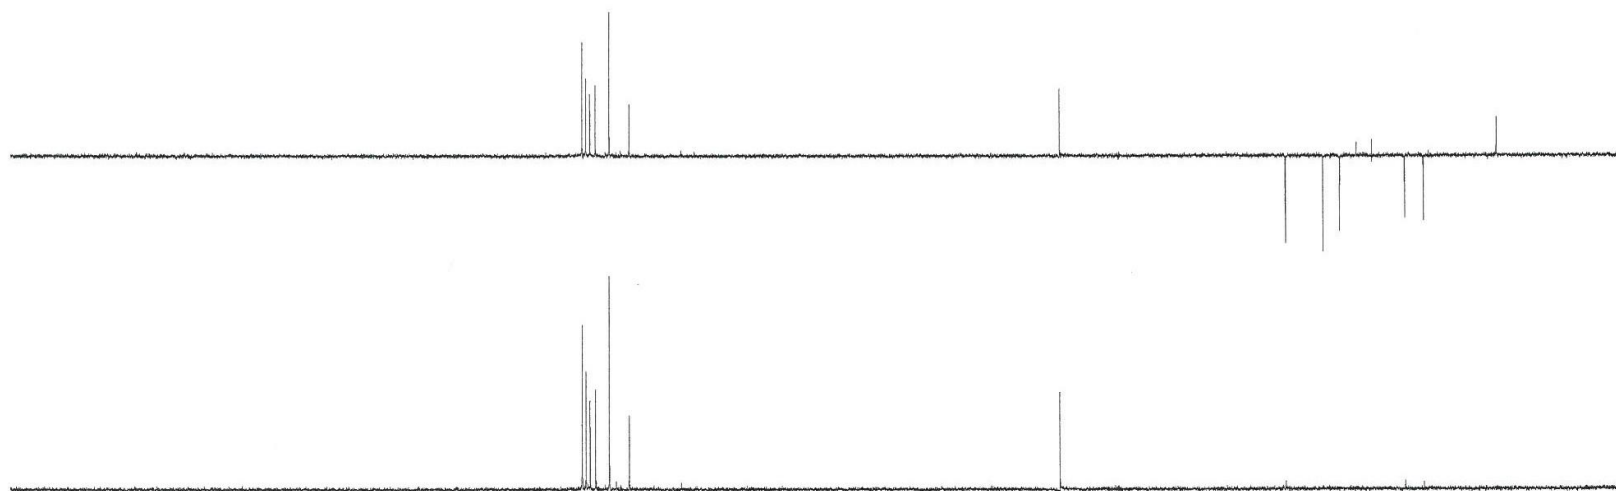

Milu-2014-P079A

Pulse Sequence: s2pu1

UNITYplus-400 "unity400"

Date: Jun 20 2014

Solvent: CDC13

Ambient temperature

Total 64 repetitions

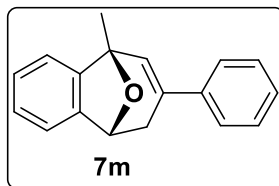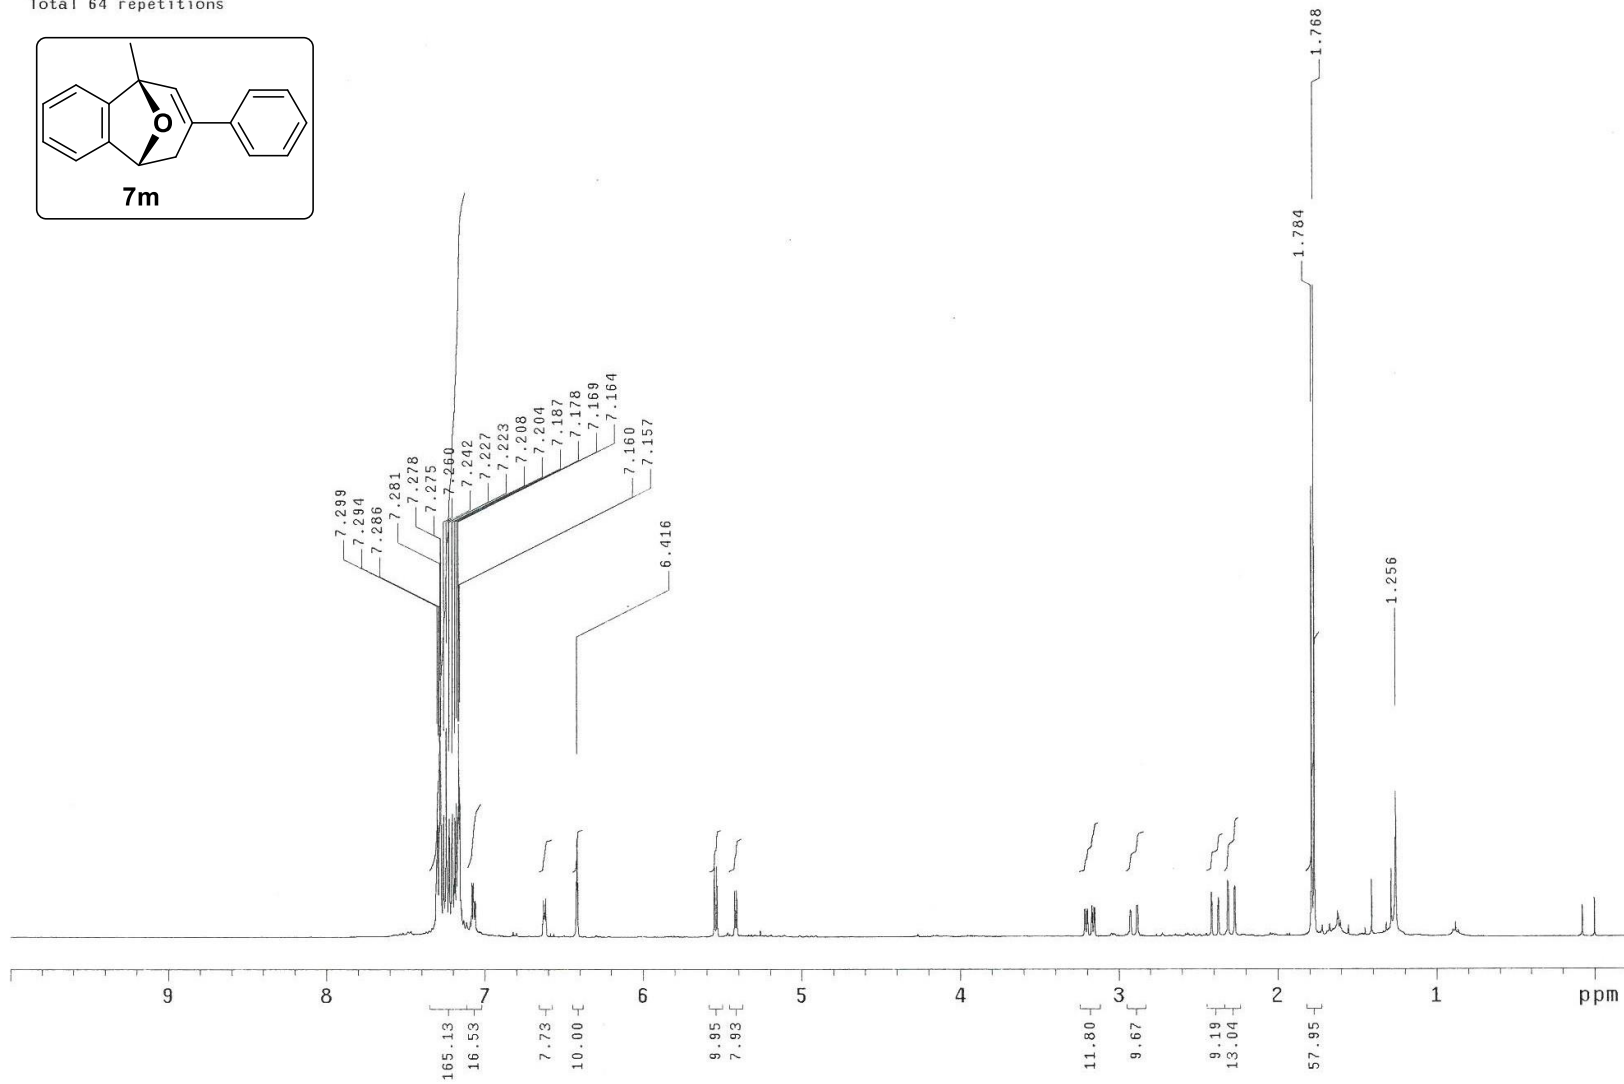



Milu-2014-P079A

Pulse Sequence: s2pu1

UNITYplus-400 "unity400"

Date: Jun 20 2014

Solvent: CDC13

Ambient temperature

Total 4112 repetitions

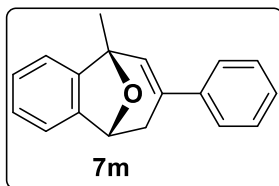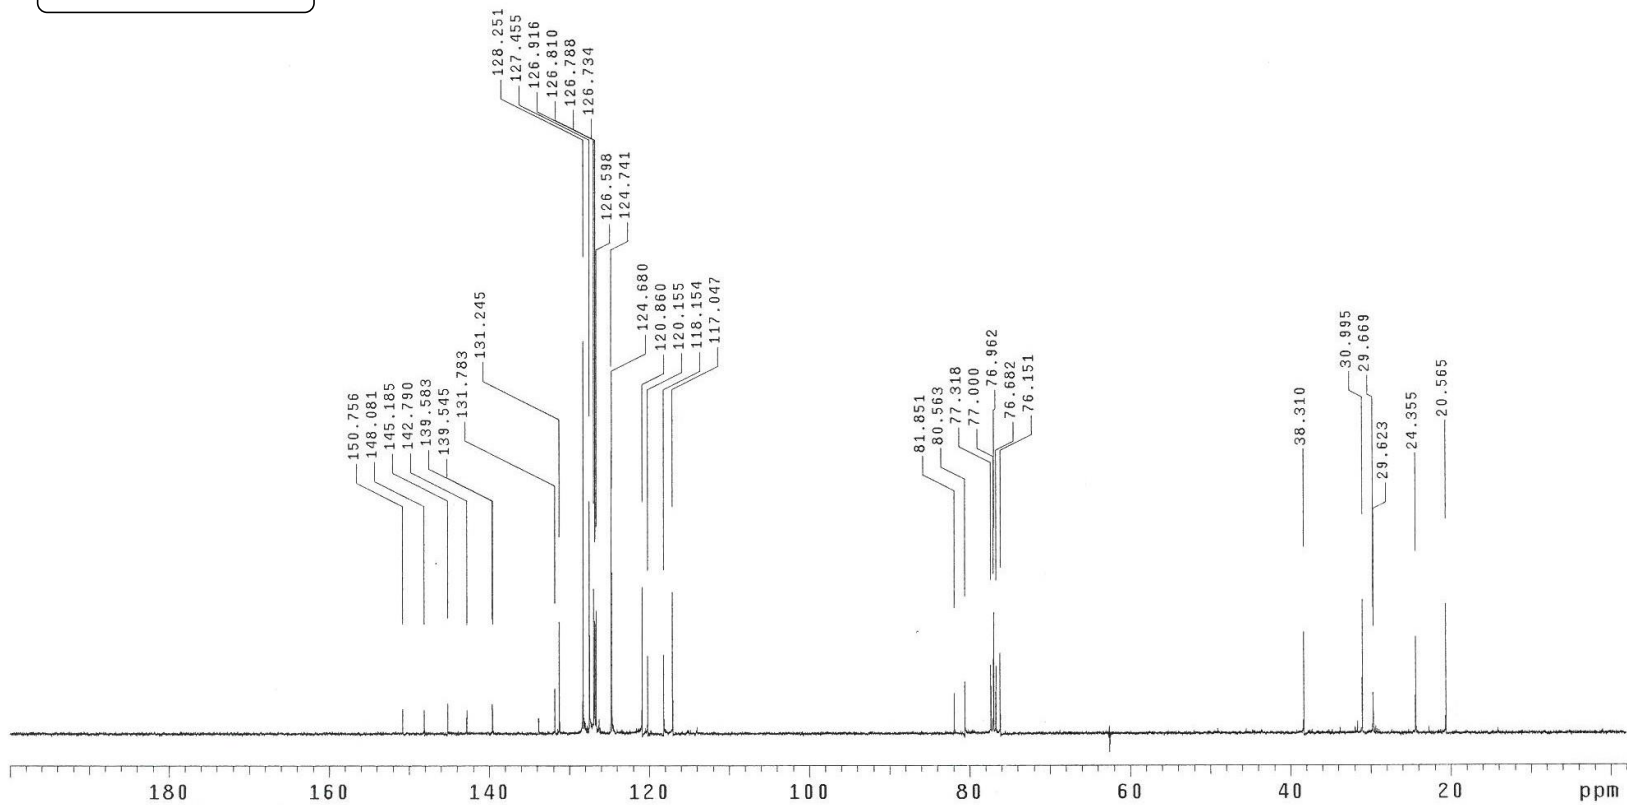

Milu-2014-P079A

Pulse Sequence: DEPT

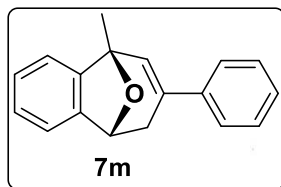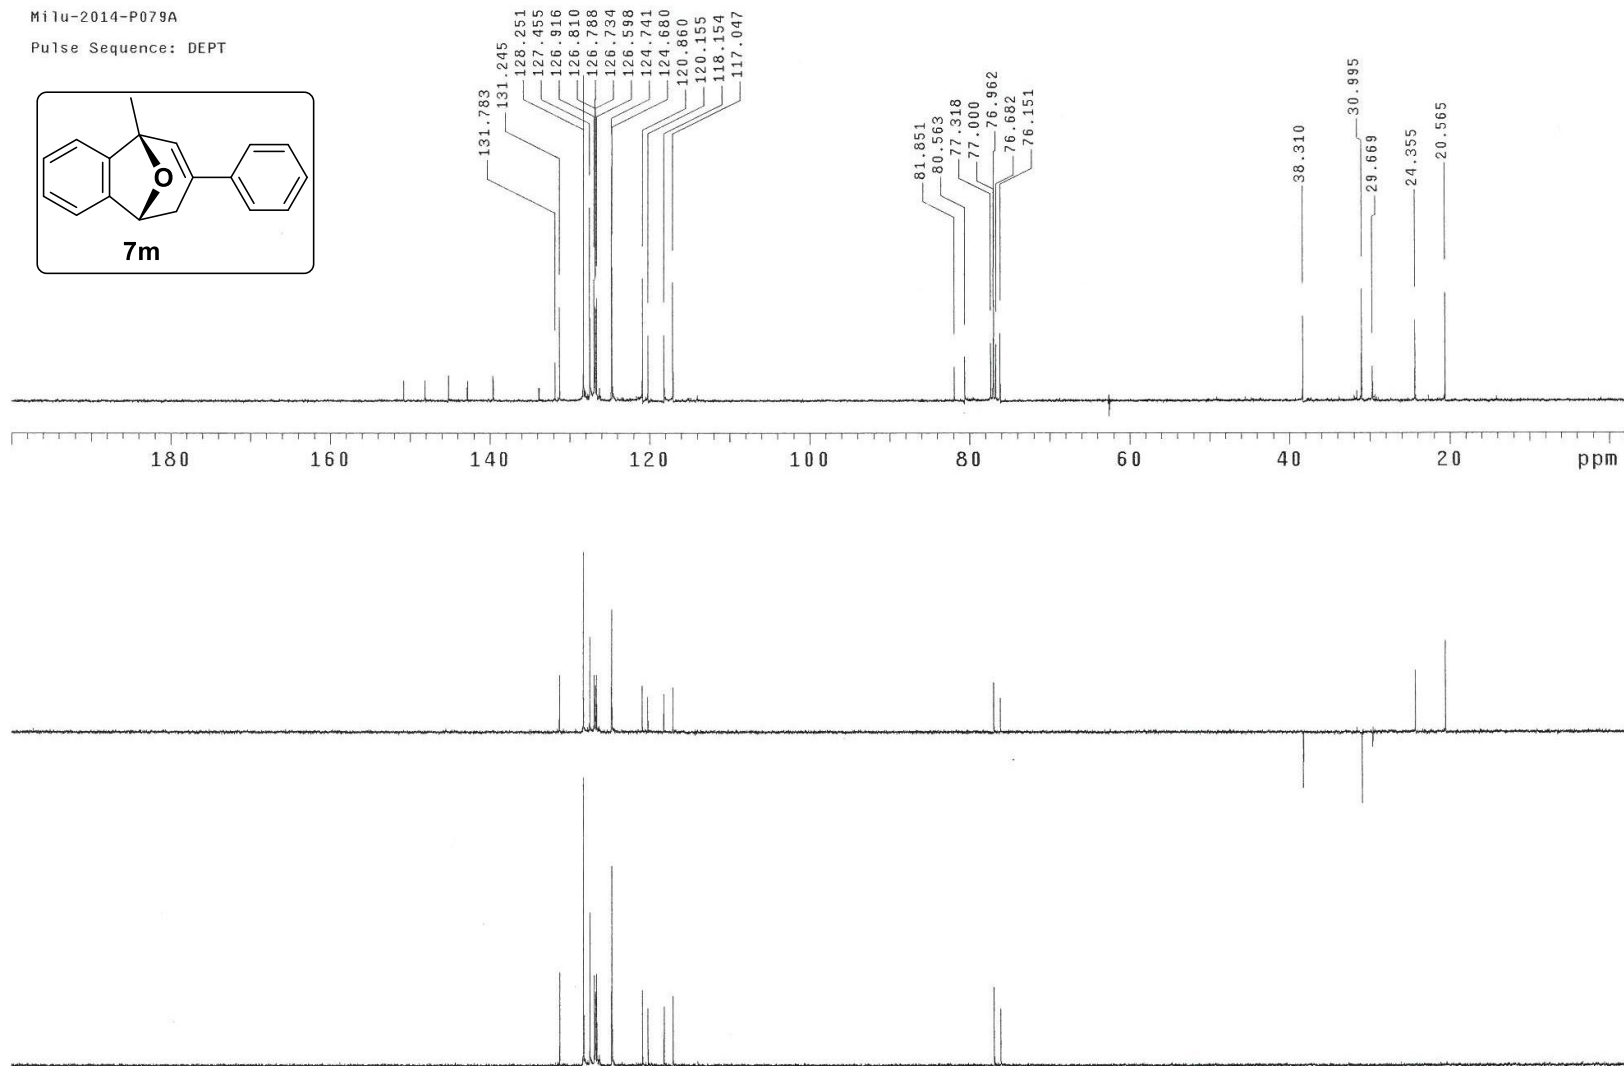

phph0004

Pulse Sequence: s2pu1

Mercury-400BB "MercuryPlus400"

Date: Sep 15 2014

Solvent: CDCl3

Ambient temperature

File: M0207-12

Total 32 repetitions

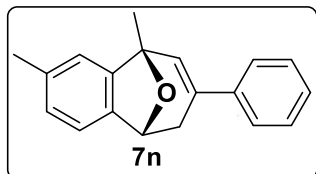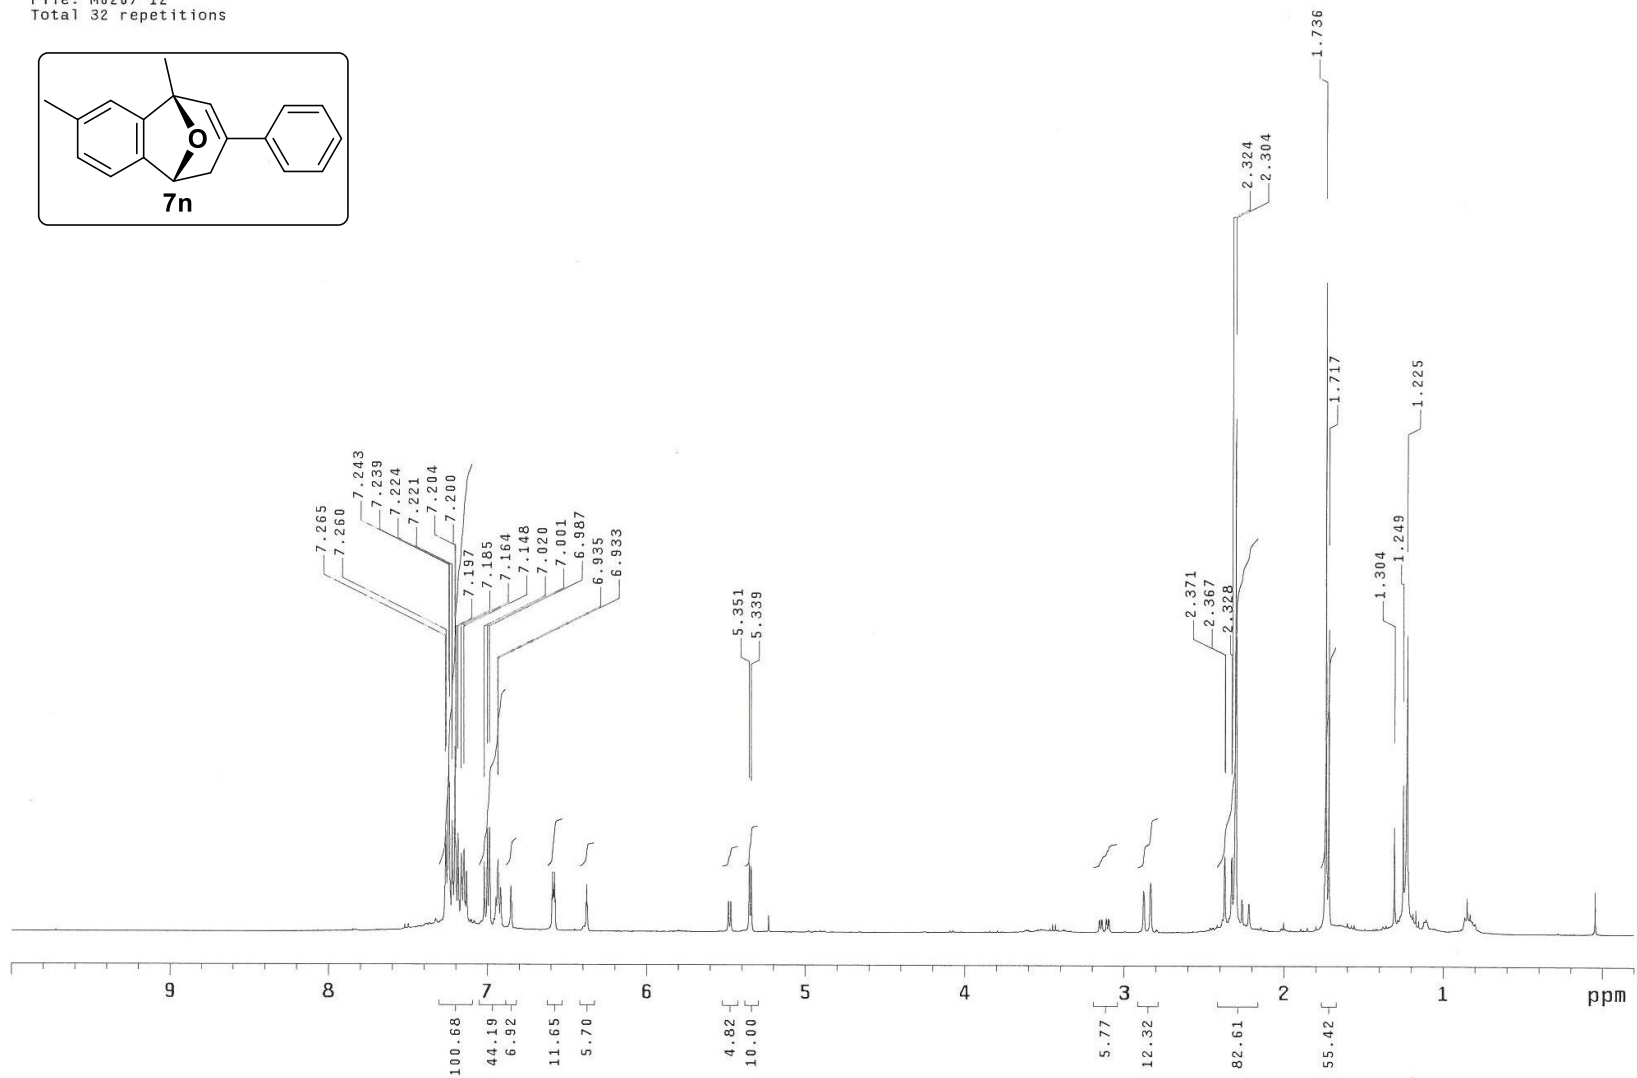

phph0004

Pulse Sequence: s2pu1

Mercury-400BB "MercuryPlus400"

Date: Sep 15 2014

Solvent: CDCl<sub>3</sub>

Ambient temperature

Total 32000 repetitions

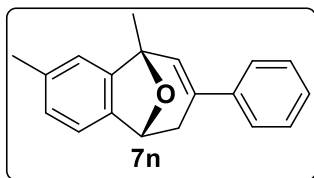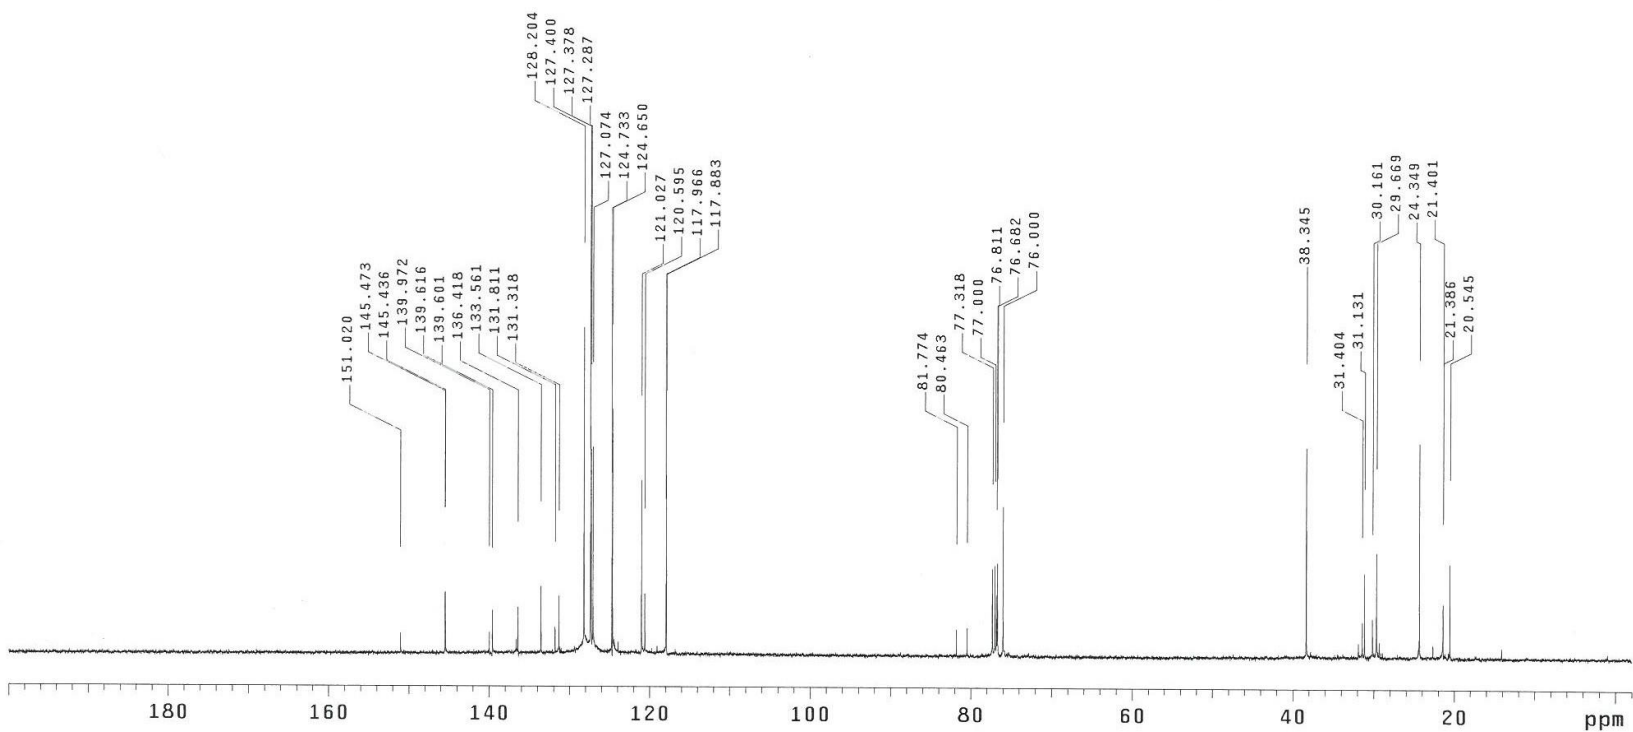

phph0004

Pulse Sequence: DEPT

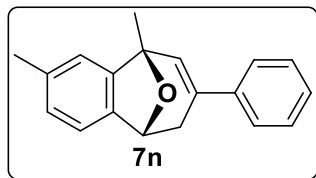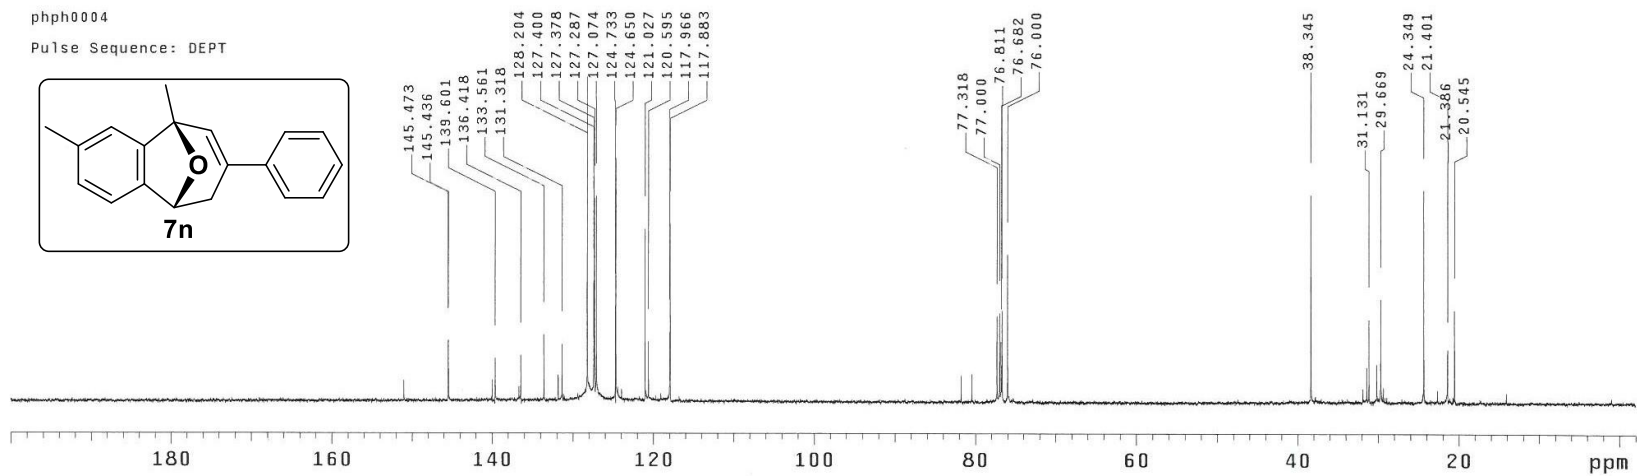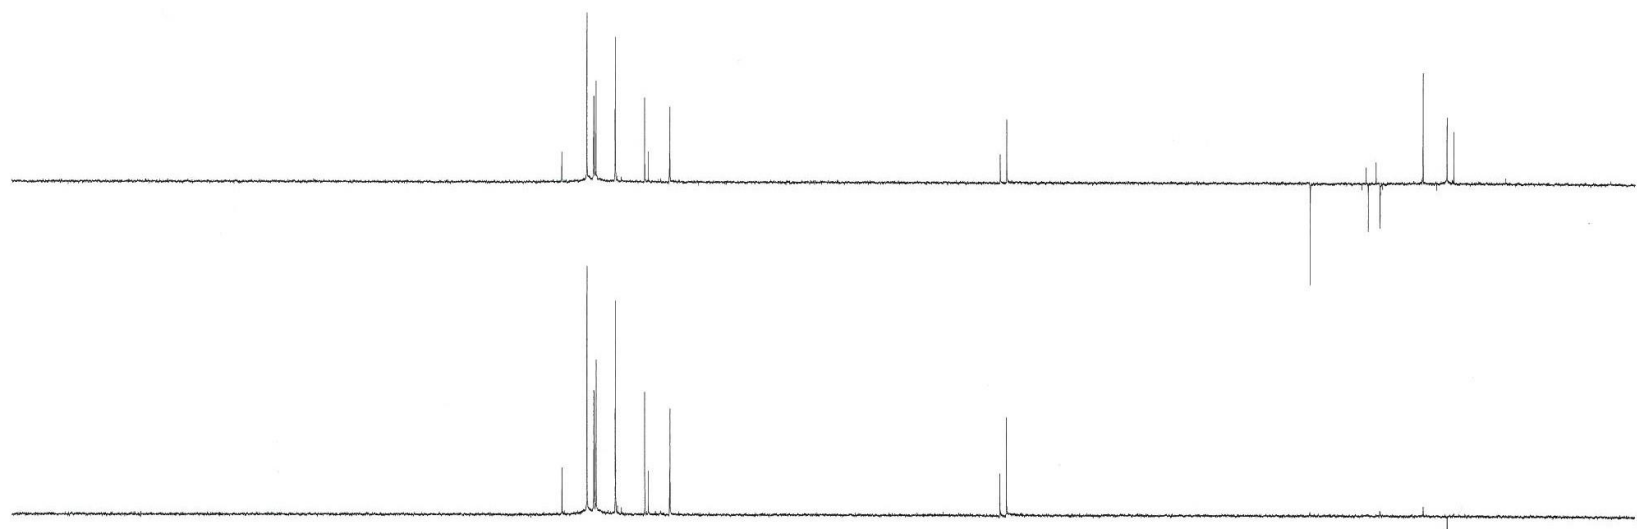

Filename = 104-96-96A\_Proton-1-4.jdf  
 Author = delta  
 Experiment = proton.jxp  
 Sample\_Id = 104-96-96A  
 Solvent = CHLOROFORM-D  
 Creation\_Time = 22-MAY-2015 10:26:36  
 Revision\_Time = 22-MAY-2015 10:27:32  
 Current\_Time = 22-MAY-2015 10:28:02

Comment = single pulse  
 Data\_Format = 1D COMPLEX  
 Dim\_Size = 13107  
 Dim\_Title = Proton  
 Dim\_Units = [ppm]  
 Dimensions = X  
 Site = JNM-ECS400  
 Spectrometer = DELTA2\_NMR

Field\_Strength = 9.389766[T] (400[MHz])  
 X\_Acq\_Duration = 2.18365952[s]  
 X\_Domain = 1H  
 X\_Freq = 399.78219838 [MHz]  
 X\_Offset = 5 [ppm]  
 X\_Points = 16384  
 X\_Prescans = 1  
 X\_Resolution = 0.45794685 [Hz]  
 X\_Sweep = 7.5030012 [kHz]  
 X\_Sweep\_Clipped = 6.00240096 [kHz]  
 Irr\_Domain = Proton  
 Irr\_Freq = 399.78219838 [MHz]  
 Irr\_Offset = 5 [ppm]  
 Tri\_Domain = Proton  
 Tri\_Freq = 399.78219838 [MHz]  
 Tri\_Offset = 5 [ppm]  
 Clipped = FALSE  
 Scans = 8  
 Total\_Scans = 8

Relaxation\_Delay = 5[s]  
 Recvr\_Gain = 42  
 Temp\_Get = 21.4 [dC]  
 X\_90\_Width = 12.031 [us]  
 X\_Acq\_Time = 2.18365952 [s]  
 X\_Angle = 45 [deg]  
 X\_Atn = 2.4 [dB]  
 X\_Pulse = 6.0155 [us]  
 Irr\_Mode = Off  
 Tri\_Mode = Off  
 Dante\_Presat = FALSE  
 Initial\_Wait = 1[s]  
 Repetition\_Time = 7.18365952 [s]

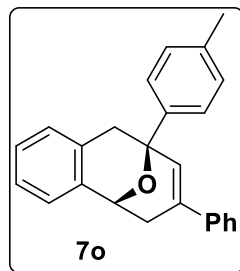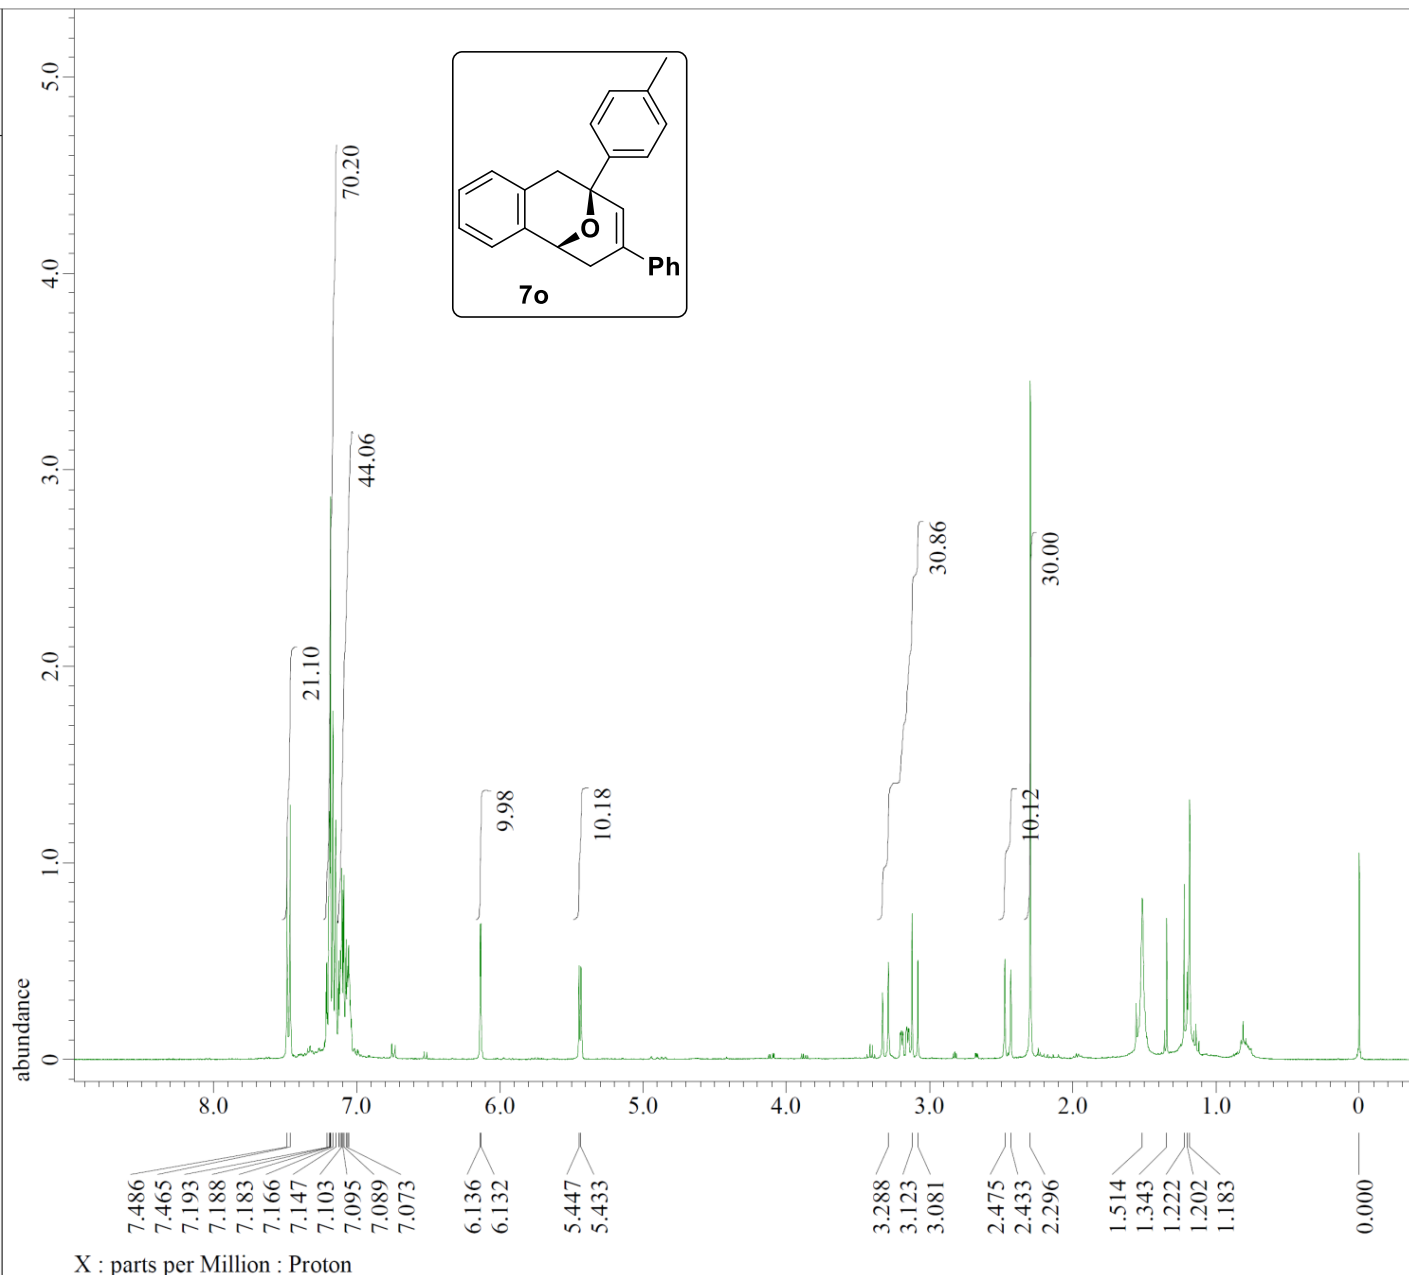

```

Filename      = 104-96-96A_Carbon-1-3.jdf
Author       = delta
Experiment   = carbon.jxp
Sample_Id    = 104-96-96A
Solvent      = CHLOROFORM-D
Creation_Time = 22-MAY-2015 10:29:39
Revision_Time = 22-MAY-2015 11:27:49
Current_Time = 22-MAY-2015 11:28:58

Comment      = single pulse decoupled gat
Data_Format  = 1D COMPLEX
Dim_Size     = 26214
Dim_Title    = Carbon13
Dim_Units    = [ppm]
Dimensions   = X
Site         = JNM-ECS400
Spectrometer = DELTA2_NMR

Field_Strength = 9.389766[T] (400[MHz])
X_Acq_Duration = 1.04333312[s]
X_Domain      = 13C
X_Freq        = 100.52530333[MHz]
X_Offset      = 100[ppm]
X_Points      = 32768
X_Prescans    = 4
X_Resolution  = 0.95846665[Hz]
X_Sweep       = 31.40703518[kHz]
X_Sweep_Clip  = 25.12562814[kHz]
Irr_Domain    = Proton
Irr_Freq      = 399.78219838[MHz]
Irr_Offset    = 5[ppm]
Clipped       = FALSE
Scans         = 1024
Total_Scans   = 1024

Relaxation_Delay = 2[s]
Recvr_Gain      = 60
Temp_Get        = 22[dC]
X_90_Width     = 9.56[us]
X_Acq_Time     = 1.04333312[s]
X_Angle        = 30[deg]
X_Atn          = 5.3[dB]
X_Pulse        = 3.18666667[us]
Irr_Atn_Dec    = 22.008[dB]
Irr_Atn_No     = 22.008[dB]
Irr_Noise     = WALTZ
Irr_Pwidth     = 0.115[ms]
Decoupling     = TRUE
Initial_Wait   = 1[s]
Noe            = TRUE
Noe_Time       = 2[s]
Repetition_Time = 3.04333312[s]
  
```

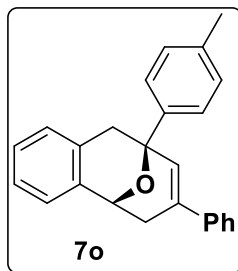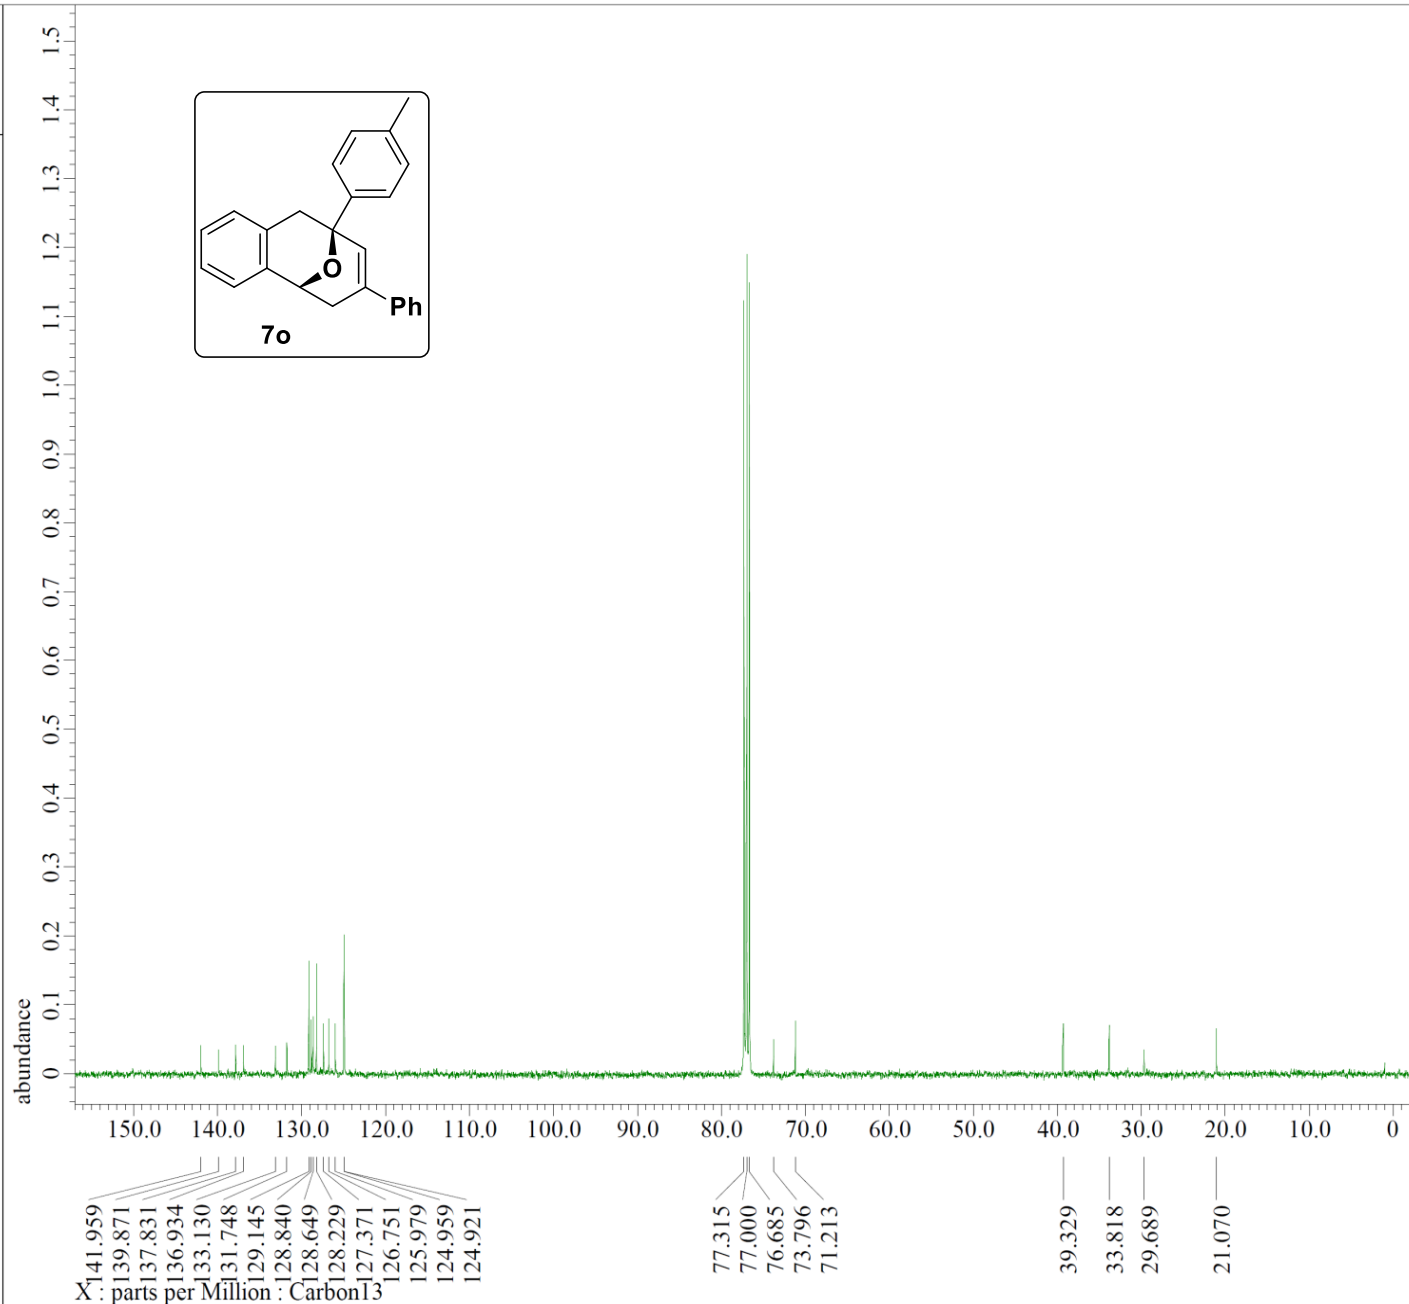

Filename = 104-101-101A\_Proton-1-6.jd  
 Author = delta  
 Experiment = proton.jxp  
 Sample\_Id = 104-101-101A  
 Solvent = CHLOROFORM-D  
 Creation\_Time = 27-MAY-2015 09:14:39  
 Revision\_Time = 27-MAY-2015 09:20:52  
 Current\_Time = 27-MAY-2015 09:21:17

Comment = single\_pulse  
 Data\_Format = 1D\_COMPLEX  
 Dim\_Size = 13107  
 Dim\_Title = Proton  
 Dim\_Units = [ppm]  
 Dimensions = X  
 Site = JNM-ECS400  
 Spectrometer = DELTA2\_NMR

Field\_Strength = 9.389766[T] (400[MHz])  
 X\_Acq\_Duration = 2.18365952[s]  
 X\_Domain = 1H  
 X\_Freq = 399.78219838[MHz]  
 X\_Offset = 5[ppm]  
 X\_Points = 16384  
 X\_Prescans = 1  
 X\_Resolution = 0.45794685[Hz]  
 X\_Sweep = 7.5030012[kHz]  
 X\_Sweep\_Clipped = 6.00240096[kHz]  
 Irr\_Domain = Proton  
 Irr\_Freq = 399.78219838[MHz]  
 Irr\_Offset = 5[ppm]  
 Tri\_Domain = Proton  
 Tri\_Freq = 399.78219838[MHz]  
 Tri\_Offset = 5[ppm]  
 Clipped = FALSE  
 Scans = 8  
 Total\_Scans = 8

Relaxation\_Delay = 5[s]  
 Recvr\_Gain = 32  
 Temp\_Get = 21.3[dC]  
 X\_90\_Width = 12.031[us]  
 X\_Acq\_Time = 2.18365952[s]  
 X\_Angle = 45[deg]  
 X\_Atn = 2.4[dB]  
 X\_Pulse = 6.0155[us]  
 Irr\_Mode = Off  
 Tri\_Mode = Off  
 Dante\_Presat = FALSE  
 Initial\_Wait = 1[s]  
 Repetition\_Time = 7.18365952[s]

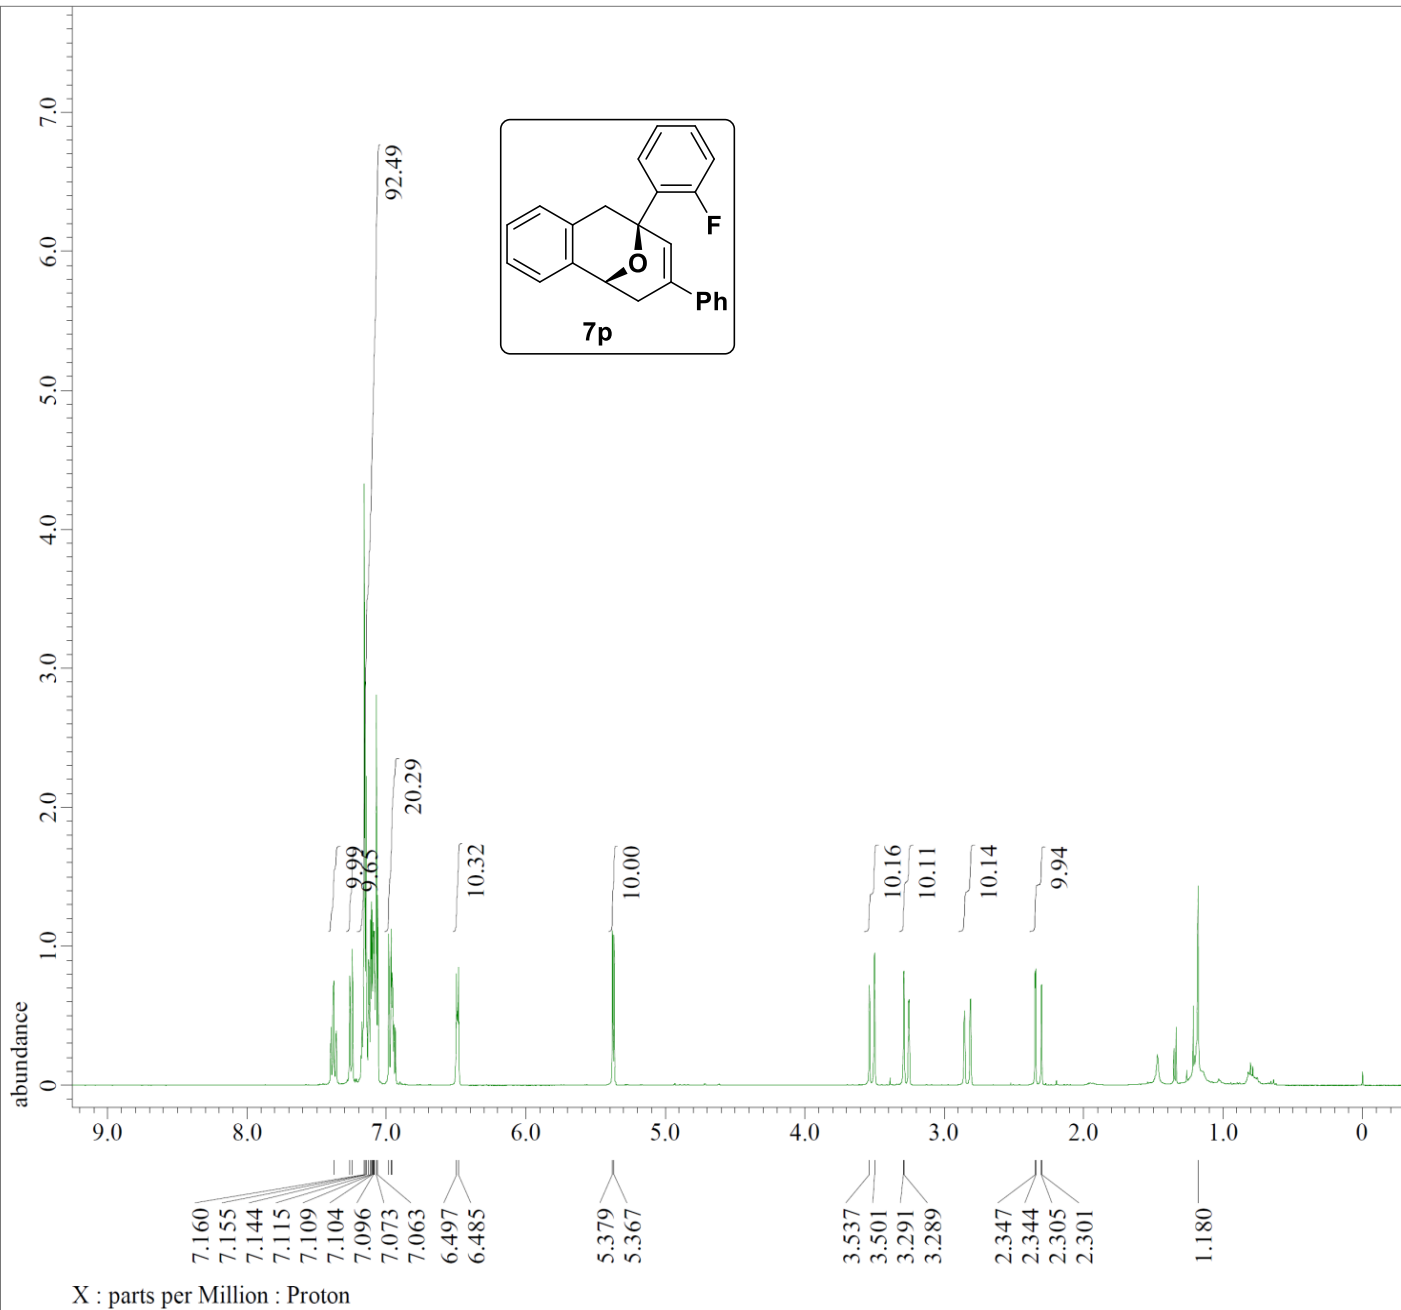



Filename = 104-101-101A\_Carbon-1-3.jd  
 Author = delta  
 Experiment = carbon.jxp  
 Sample\_Id = 104-101-101A  
 Solvent = CHLOROFORM-D  
 Creation\_Time = 27-MAY-2015 09:17:42  
 Revision\_Time = 27-MAY-2015 09:37:48  
 Current\_Time = 27-MAY-2015 09:38:12

Comment = single pulse decoupled gat  
 Data Format = 1D COMPLEX  
 Dim\_Size = 26214  
 Dim\_Title = Carbon13  
 Dim\_Units = [ppm]  
 Dimensions = X  
 Site = JNM-ECS400  
 Spectrometer = DELTA2\_NMR

Field Strength = 9.389766[T] (400[MHz])  
 X\_Acq\_Duration = 1.04333312[s]  
 X\_Domain = 13C  
 X\_Freq = 100.52530333[MHz]  
 X\_Offset = 100[ppm]  
 X\_Points = 32768  
 X\_Prescans = 4  
 X\_Resolution = 0.95846665[Hz]  
 X\_Sweep = 31.40703518[kHz]  
 X\_Sweep\_Clippped = 25.12562814[kHz]  
 Irr\_Domain = Proton  
 Irr\_Freq = 399.78219838[MHz]  
 Irr\_Offset = 5[ppm]  
 Clipped = FALSE  
 Scans = 477.0  
 Total\_Scans = 477.0

Relaxation\_Delay = 2[s]  
 Recvr\_Gain = 60  
 Temp\_Get = 21.7[dC]  
 X\_90\_Width = 9.56[us]  
 X\_Acq\_Time = 1.04333312[s]  
 X\_Angle = 30[deg]  
 X\_Atn = 5.3[dB]  
 X\_Pulse = 3.18666667[us]  
 Irr\_Atn\_Dec = 22.008[dB]  
 Irr\_Atn\_Noie = 22.008[dB]  
 Irr\_Noise = WALTZ  
 Irr\_Pwidth = 0.115[ms]  
 Decoupling = TRUE  
 Initial\_Wait = 1[s]  
 Noe = TRUE  
 Noe\_Time = 2[s]  
 Repetition\_Time = 3.04333312[s]

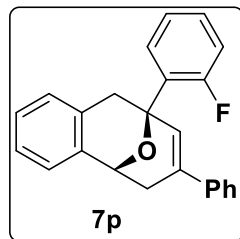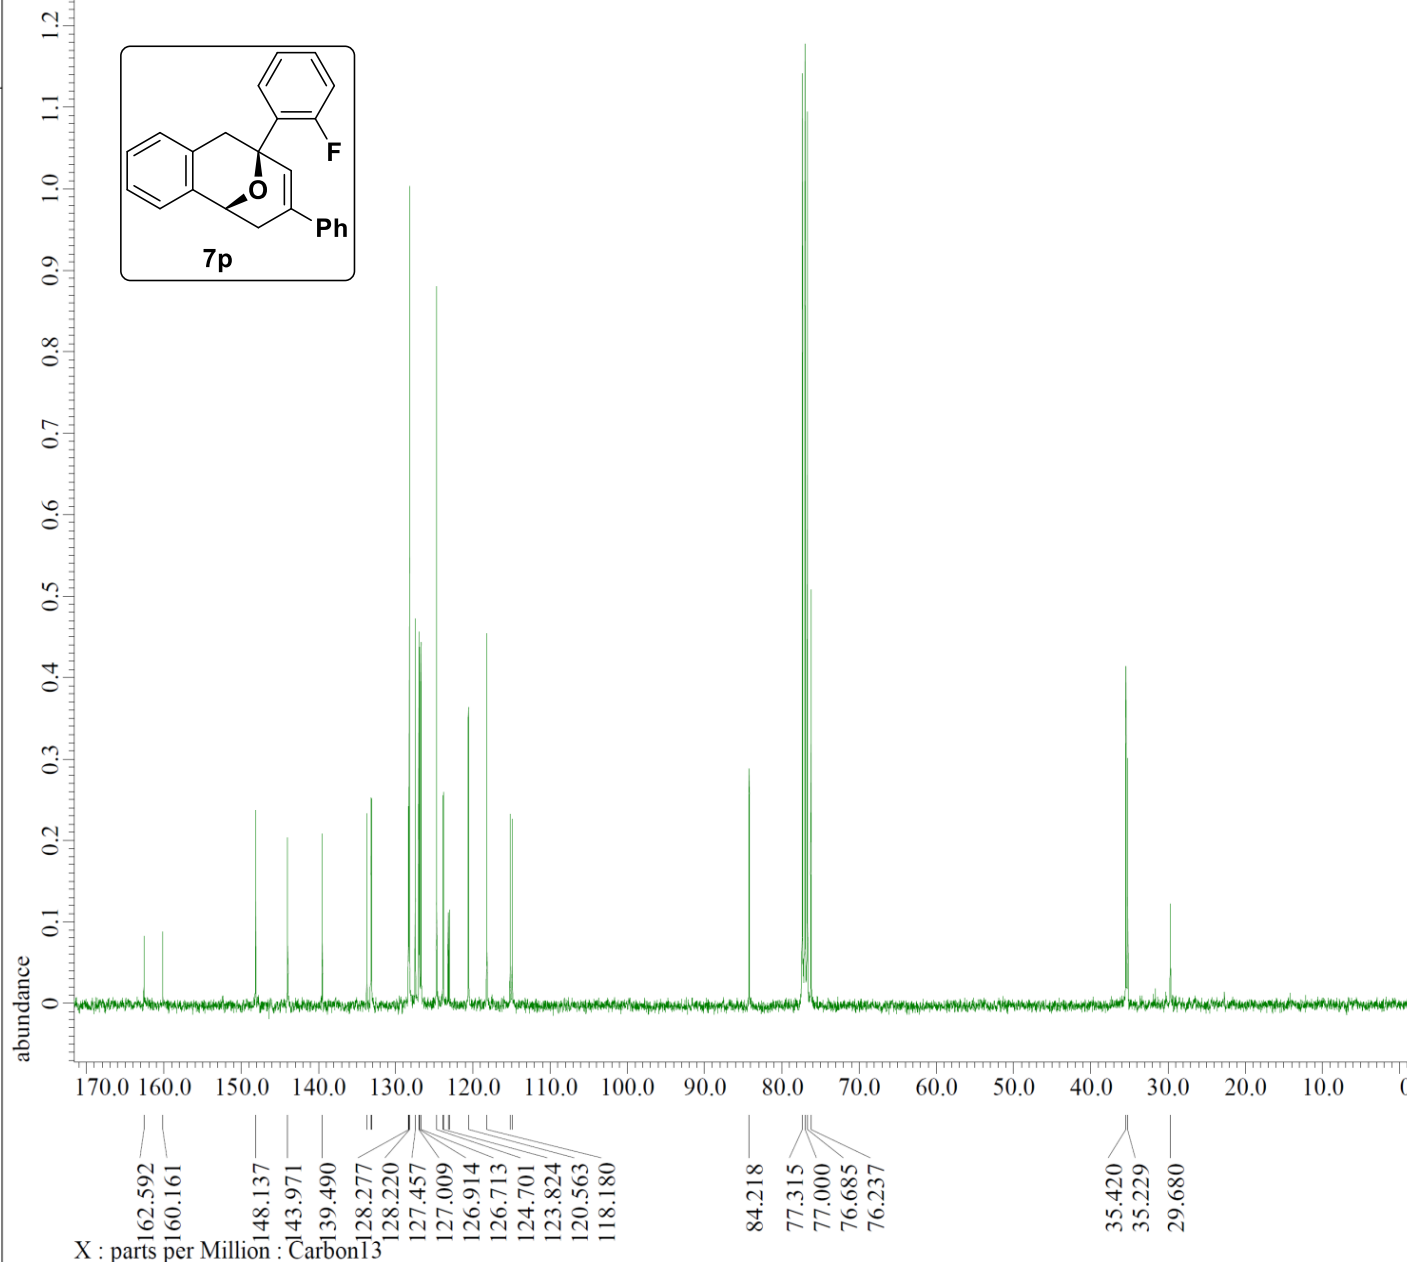

Supplement: c5cc02847g1.pdf [file c5cc02847g1.pdf]
